# Supplementary material
Source: Frontiers journal article supplement (https://www.frontiersin.org/articles/392979)
Supplement: Data_Sheet_2.xls [file Data_Sheet_2.xls]

## Sheet: Sheet1
	Supplementary material: Raw data
Information about scenarios							Physiological Features																Questionnaire Outputs											Vehicle Kinematics
Participant ID	Session number (1-4)	Time of Day (0 = Day, 1= Night)	Environment (0 = Town, 1= Highway)	Weather (0= Sunny, 1= Snowy)	Cell phone used ? (0 = no, 1 = yes)	Order of scenario within session (1-8)	Mean of skin temperature	Median of skin temperature	Mean of respiration rate	standard deviation of respiration rate	RMS of standard deviation of respiration rate	Mean of tonic GSR	Difference of tonic GSR	Number of skin conductance responses	Mean amplitude of skin conductance responses	standard deviation of skin conductance response amplitude	Mean HR	standard deviation of inter beat interval	Power of low frequencies ECG	Power of high frequencies ECG	Low/high frequency power ratio in ECG	Absolute gradient of raw ECG	Extraversion [5-55]	Agreeableness [4-54]	Conscientiousness [4-54]	Emotional Stability [8-58]	Intellect/ Imagination [3-53]	Competitiveness [3-53]	Stress level [0-40]	Positive Affect [0-1]	Negative Affect [0-1]	Activated Affect [0-1]	Unactivated Affect [0-1]	standard deviation of Longitudinal acceleration	standard deviation of throttle	standard deviation of Lane number	standard deviation of Lane offset	standard deviation of Road offset	standard deviation of vertical velocity	standard deviation of front tire slip level	slip of back tires slip level	Mean of Longitudinal acceleration	Mean of Throttle	Mean of Lane number	Mean of Lane offset	Mean of Road offset	Mean of Vertical velocity	Mean of front tire slip level	Mean of back tires slip level
1	1	0	0	0	0	7	0.343054	1	0	0.842061	0.69379	0.325033	0.019848	0.112313	0.289191	0.629827	0	0.492448	0.832555	0.52434	0.137503	1.06388e-22	36	27	28	30	40	36	17	0.525	0.138889	0.361111	0.416667	1	0.234049	0.329419	0.357058	0.347218	0.343144	0.35955	0.00250681	1	0.211354	0.060657	0.193044	1	1	1	0.0958578
1	1	0	0	0	1	3	0.186909	0.254764	0.522678	0.607526	0.485449	0.776159	1	1	0.345304	0.164524	1	1	0.988893	0.0782752	1	0.8938	36	27	28	30	40	36	17	0.525	0.138889	0.361111	0.416667	0.354626	1.28156e-16	0.551377	0.0414222	0.289006	1	0.315439	2.58712e-15	0.687637	0.987396	1	1	0.79714	0.793192	0.645591	0.0777373
1	1	0	0	1	0	2	0.382648	0.312684	0.496318	0.251184	0.27782	0	0	0	0	0	0.221688	0.345857	0.790629	0	0.9178	0.0379686	36	27	28	30	40	36	17	0.525	0.138889	0.361111	0.416667	0.0766647	0	6.23601e-16	5.02256e-17	1	5.02928e-15	1.61349e-14	0.71594	0.387558	0.978135	0.154842	0.886796	0.632293	0.392342	6.43614e-14	0.279129
1	1	0	0	1	1	5	0.00135838	0.366884	0.240626	1	1	0.726749	0.532483	0.480789	0.38887	0.219541	0.73999	0.52464	1	0.111162	0.978933	1	36	27	28	30	40	36	17	0.525	0.138889	0.361111	0.416667	0.136112	0.0191801	0.688985	0.0525107	0.226369	0.377873	0.206	0.871603	0.546665	1	0.613494	0.920785	0.775131	0.638451	0.538652	0.607327
1	1	0	1	0	0	1	0.719735	0	1	0	0	0.553665	0.713318	0.107348	1	0.983978	0.929192	0	0.240954	0.472516	0.108504	0.19019	36	27	28	30	40	36	17	0.525	0.138889	0.361111	0.416667	0	0	0	0	0	0	0	0	0	0	0	0	0	0	0	0
1	1	0	1	0	1	6	0	0.551363	0.285336	0.627878	0.629032	1	0.144146	0.696186	0.356412	0.44774	0.523899	0.0717667	0	0.693735	0.0628923	0.367527	36	27	28	30	40	36	17	0.525	0.138889	0.361111	0.416667	1.59108e-17	1	0.733116	1	0.52788	0.0888373	0.720225	0.0805009	1.32697e-17	0.442361	0.453184	0.281968	0.00125631	0.0188574	0.651175	1.69089e-14
1	1	0	1	1	0	4	0.0411287	0.412198	0.44883	0.30886	0.340922	0.574737	0.13216	0.0195246	0.364437	0.658362	0.0402791	0.639864	0.0730342	0.745717	0	0.103916	36	27	28	30	40	36	17	0.525	0.138889	0.361111	0.416667	0.0386391	0.918811	0.405074	0.927896	0.195564	0.168184	1	1	0.0211382	0.101692	7.61153e-16	0.0726938	1.08675e-17	5.16099e-15	0.723171	1
1	1	0	1	1	1	8	1	0.0712571	0.36982	0.743916	0.669951	0.338809	0.566542	0.551062	0.588314	1	0.409781	0.513882	0.180421	1	0.640773	0.360856	36	27	28	30	40	36	17	0.525	0.138889	0.361111	0.416667	0.069303	0.830446	1	0.826429	8.66138e-17	0.463797	0.795307	0.576355	0.0855982	5.25862e-16	0.606039	1.16405e-16	0.0553404	0.219852	0.819232	0.746543
1	2	0	0	0	0	6	0	1	0	0.54839	0.300206	0.686209	0.102991	0	0.862377	1	0.297881	0.168269	0.151275	0.426138	0.0996693	0.0371728	36	27	28	30	40	36	17	0.525	0.138889	0.361111	0.416667	1	0.20997	0.218826	0.309588	0.465503	1	0.202325	0.248521	1	2.94137e-16	0.186794	6.80777e-17	1	1	0.785531	0.408202
1	2	0	0	0	1	8	0.0528066	0.932381	0.354309	1	0.810054	1	0.378071	0.707763	1	0.371695	1	0.535979	1	0	0.816319	1	36	27	28	30	40	36	17	0.525	0.138889	0.361111	0.416667	0.322286	1.38171e-16	0.409478	0.0372542	0.175912	0.880898	1	0.762284	0.61567	0.988497	0.40439	0.927465	0.926947	0.853166	1	0.684047
1	2	0	0	1	0	2	0.429781	0.723726	0.635203	0	0	0.0015164	0	1	0	0	0.549578	0	0.550096	0.14758	0.98053	9.49958e-23	36	27	28	30	40	36	17	0.525	0.138889	0.361111	0.416667	0.252281	0	6.15566e-16	5.28166e-17	1	0.127804	1.19325e-14	0.672812	0.476224	0.974085	0.444264	0.963512	0.765597	0.53533	0.227446	0.347139
1	2	0	0	1	1	4	0.0954662	0.705592	1	0.448615	0.314506	0.552632	0.31739	0.477062	0.937521	0.456118	0.699847	0.514699	0.75198	0.0586615	1	0.73025	36	27	28	30	40	36	17	0.525	0.138889	0.361111	0.416667	0.348929	0.0216298	0.863284	0.0649142	5.43767e-17	0.642138	0.097162	0.988535	0.590258	1	1	1	0.867527	0.729097	0.519259	0.784692
1	2	0	1	0	0	3	0.295723	0.810727	0.57501	0.687512	0.540782	0.217569	1	0.92057	0.494062	0.626319	0	1	0.383705	0.0874143	0.416274	0.319382	36	27	28	30	40	36	17	0.525	0.138889	0.361111	0.416667	0.26633	0.964049	0.788393	0.914167	0.165129	0.177977	0.576394	2.70931e-15	0.132365	0.414802	0.477852	0.365887	0.128898	0.267407	0.478895	0.0662891
1	2	0	1	0	1	5	0.0315655	0.922979	0.392878	0.975179	1	0.669327	0.304821	0.63114	0.860662	0.460421	0.594274	0.280965	0.00409007	1	0	0.451747	36	27	28	30	40	36	17	0.525	0.138889	0.361111	0.416667	0.114448	0.977502	0.621208	0.934372	0.215056	0.228864	0.336987	7.55129e-05	0.0917287	0.457835	0.472383	0.418886	0.0932054	0.208938	0.238467	1.55195e-14
1	2	0	1	1	0	7	1	0	0.96699	0.125267	0.113659	0	0.199962	0.738199	0.0857395	0.00500617	0.365291	0.114025	0	0.555186	0.107943	0.146474	36	27	28	30	40	36	17	0.525	0.138889	0.361111	0.416667	0.156164	0.988564	1	0.951651	0.124981	0.316699	0.394264	1	0.129633	0.476964	0.829241	0.442427	0.130973	0.216022	0.508822	1
1	2	0	1	1	1	1	0.0230397	0.981337	0.287304	0.615003	0.634533	0.842721	0.110193	0.552186	0.989784	0.50048	0.322289	0.579702	0.411261	0.520851	0.532574	0.437674	36	27	28	30	40	36	17	0.525	0.138889	0.361111	0.416667	1.38332e-17	1	0.100646	1	0.112175	2.99473e-15	0.152968	0.84404	9.66622e-18	0.536223	6.29754e-16	0.510688	1.01771e-17	3.92763e-15	4.60682e-14	0.542874
1	3	1	0	0	0	3	0.4598	0.528019	0	0.405957	0.304631	0	0	0	0	0	0.0704149	0.574663	0.562882	0.39962	0.109002	2.03723e-22	36	27	28	30	40	36	17	0.625	0.25	0.305556	0.638889	0.545894	0.253588	9.27428e-16	0.324849	0.447957	1	0.0728729	0.0590993	0.776651	3.57174e-16	9.81083e-16	9.52186e-17	0.932884	0.981722	0.101332	0.0584174
1	3	1	0	0	1	5	0.111124	0.35629	0.749418	0.393281	0.540891	0	0	0	0	0	0.651615	0	1	0.0690352	0.219341	1	36	27	28	30	40	36	17	0.625	0.25	0.305556	0.638889	0.317927	0.130905	0.679821	0.157229	0.350639	0.397725	0.0332793	0.0839007	0.56957	0.851912	0.557606	0.805438	1	0.814742	0.0850993	0.0409934
1	3	1	0	1	0	8	0.380569	0.531256	0.894331	0.857136	0.59848	0	0	0	0	0	0	0.198645	0.706017	0.0246893	0.267582	0.259347	36	27	28	30	40	36	17	0.625	0.25	0.305556	0.638889	1	0.332631	0.3218	0.379858	1	0.957963	0.741338	1	1	0.56258	0.145478	0.56569	0.849605	1	0.62433	0.703736
1	3	1	0	1	1	2	0	0	0.620974	0.55629	0.381734	0	0	0	0	0	0.608131	1	0.827666	0	1	0.712074	36	27	28	30	40	36	17	0.625	0.25	0.305556	0.638889	0.271439	1.34049e-16	0.520428	5.856e-17	0.413113	1.8205e-15	1.8324e-15	0.270492	0.456696	1	0.575631	1	0.858565	0.470515	7.24192e-15	0.0775023
1	3	1	1	0	0	1	0.692444	0.627733	0.384635	0.31297	0.312868	0	0	0	0	0	1	0.882195	0	0.439897	0.180731	0.400241	36	27	28	30	40	36	17	0.625	0.25	0.305556	0.638889	1.7308e-17	0.973651	0.270888	0.982766	0.466682	0.0807189	0.058445	0.0124924	9.70897e-18	0.407072	0.135483	0.353262	1.04882e-17	3.93229e-15	0.00290173	2.24351e-15
1	3	1	1	0	1	7	1	0.241357	1	0.693527	0.495555	0	0	0	0	0	0.324737	0.58138	0.843276	0.267699	0	0.252068	36	27	28	30	40	36	17	0.625	0.25	0.305556	0.638889	0.0989851	1	1	1	0.172445	0.0548299	0.0309642	7.55666e-16	0.153488	0.436973	1	0.366624	0.0999642	0.138792	0.0523244	0.00710888
1	3	1	1	1	0	6	0.629207	1	0.353502	0	0	0	0	0	0	0	0.323857	0.50462	0.160049	0.233629	0.388249	0.0691443	36	27	28	30	40	36	17	0.625	0.25	0.305556	0.638889	0.628859	0.994079	0.312316	0.954871	0.563758	0.344632	1	0.857454	0.678244	0.429877	0.617126	0.266686	0.12915	0.359569	1	1
1	3	1	1	1	1	4	0.084453	0.45154	0.945899	1	1	0	0	0	0	0	0.877137	0.568989	0.492505	1	0.196557	0.542287	36	27	28	30	40	36	17	0.625	0.25	0.305556	0.638889	0.0284451	0.940977	0.879591	0.933488	5.82121e-17	0.134431	0.495583	0.405156	0.0724071	0.25617	0.772862	0.198367	0.113615	0.0807016	0.212048	0.228359
1	4	1	0	0	0	5	1	0.513976	0	0.948982	0.741117	0	0	0	0	0	0.48175	0	0.81112	0.877713	0.331427	0.0241903	36	27	28	30	40	36	17	0.7	0.222222	0.277778	0.75	1	0.12858	1.09316e-15	0.182105	0.462796	1	1.0498e-15	5.30204e-16	1	4.275e-16	1.33788e-15	1.07033e-16	1	1	0.0246207	0.00688745
1	4	1	0	0	1	2	0.530607	0	0.884953	0.842127	0.529554	0	0	0	0	0	1	0.801226	0.649943	0.819036	0.994598	1	36	27	28	30	40	36	17	0.7	0.222222	0.277778	0.75	0.215725	1.52445e-16	0.506654	6.38709e-17	1	0.59364	0.0138501	0.0317651	0.574834	1	0.855628	1	0.85514	0.75985	5.67331e-15	2.13448e-15
1	4	1	0	1	0	4	0.725787	0.529969	0.345619	0	0	0	0	0	0	0	0	0.230658	0.593521	0.0872474	0.757058	1.47642e-22	36	27	28	30	40	36	17	0.7	0.222222	0.277778	0.75	0.13491	0.134842	0.0259102	0.183123	0.391318	0.626039	0.539164	0.323626	0.527294	0.117713	0.0138308	0.0409921	0.873314	0.724001	0.412262	0.215848
1	4	1	0	1	1	7	0	0.165149	0.350646	1	1	0	0	0	0	0	0.0175534	1	0.52899	0	1	0.618447	36	27	28	30	40	36	17	0.7	0.222222	0.277778	0.75	0.313339	0.112615	0.441623	0.131738	1.77271e-16	0.63062	0.155126	0.31731	0.547958	0.550677	0.428629	0.448564	0.805343	0.695783	0.0735592	0.18674
1	4	1	1	0	0	8	0.280047	1	0.726427	0.664018	0.658377	0	0	0	0	0	0.374315	0.995003	0	0.450709	0	0.296981	36	27	28	30	40	36	17	0.7	0.222222	0.277778	0.75	0.166182	0.92126	0.387867	0.874172	0.844483	0.186355	0.06623	0.0426694	0.0988597	0.323294	0.267416	0.270367	0.0442344	0.200707	0.0505444	0.0198425
1	4	1	1	0	1	3	0.0662831	0.820599	1	0.51437	0.415654	0	0	0	0	0	0.606086	0.367229	0.544902	0.877114	0.889442	0.619425	36	27	28	30	40	36	17	0.7	0.222222	0.277778	0.75	1.85159e-17	1	0.254309	1	0.469157	0.225081	0.0388949	0.0260914	0.261166	0.575223	0.250794	0.507973	0.04548	0.193849	0.0126492	0.023192
1	4	1	1	1	0	1	0.871593	0.259014	0.698926	0.805046	0.389446	0	0	0	0	0	0.739307	0.219287	1	0.245737	0.250634	0.287703	36	27	28	30	40	36	17	0.7	0.222222	0.277778	0.75	0.046539	0.938633	0.296297	0.882127	0.214614	3.02591e-15	0.316134	0.367807	1.02774e-17	0.376262	0.22024	0.299268	1.06311e-17	4.47726e-15	0.113076	0.316623
1	4	1	1	1	1	6	0.619183	0.205953	0.678134	0.6057	0.623208	0	0	0	0	0	0.681231	0.834951	0.314846	1	0.10323	0.611134	36	27	28	30	40	36	17	0.7	0.222222	0.277778	0.75	0.0237461	0.967213	1	0.968949	0.816447	0.473324	1	1	0.311146	0.464586	1	0.43623	0.015877	0.243347	1	1
2	1	0	0	0	0	7	0.0392453	0.733141	0.431561	0.899968	1	0.523369	0.0107444	0.797186	0.190574	0.108555	0.029991	0	0.864293	0.314418	0.56448	0.440625	39	47	43	27	32	39	20	0.6	0.111111	0.333333	0.361111	0.477236	0.221738	0.444699	0.335865	0.236843	0.629066	1.29382e-15	0.0433638	0.88256	5.07005e-16	0.4215	1.17822e-16	1	1	0.0393463	0.0269081
2	1	0	0	0	1	6	0.538869	0.242384	0.970092	0.836473	0.655698	0	1	0	1	1	0.661677	0.320118	0.872239	0.640864	0.263636	1	39	47	43	27	32	39	20	0.6	0.111111	0.333333	0.361111	1	0.107898	0.543718	0.145104	1	1	0.118194	0.253628	1	0.857189	0.675362	0.84809	0.816503	0.926121	0.0835058	0.126243
2	1	0	0	1	0	4	0	1	0	0	0	0.236581	0.0872063	0.553007	0	0	0.179468	0.0519477	0.289411	0.337099	1	1.15387e-22	39	47	43	27	32	39	20	0.6	0.111111	0.333333	0.361111	0.366304	1.22866e-16	8.37144e-16	4.55424e-17	0.243191	0.608691	0.823526	0.515956	0.464587	0.936922	0.462494	0.926501	0.632986	0.631081	0.544933	0.261783
2	1	0	0	1	1	5	0.118937	0.851337	0.154774	0.940267	0.922971	0.329505	0	0.7509	0.0576544	0.030587	0.233508	0.0634493	1	0	0.775821	0.31682	39	47	43	27	32	39	20	0.6	0.111111	0.333333	0.361111	0.322455	0.0531058	1	0.0453109	0.062876	0.522246	0.863889	0.40764	0.442789	1	1	1	0.643814	0.61205	0.612038	0.173384
2	1	0	1	0	0	2	0.254758	0.676905	0.256266	1	0.722171	0.245728	0.309217	0.97885	0.0718527	0.0676035	0	0.30381	0.311581	1	0.709729	0.0326563	39	47	43	27	32	39	20	0.6	0.111111	0.333333	0.361111	2.20695e-17	0.949317	0.0258247	0.903093	0.00371966	3.0775e-15	0.0395363	7.85193e-16	1.5103e-17	0.349419	7.20364e-16	0.255794	0.0585952	0.0515846	5.1871e-15	1.81224e-15
2	1	0	1	0	1	4	0.299006	0.601699	0.356235	0.0819238	0.307009	0.438581	0.207425	0.769383	0.218489	0.121828	0.767406	0.160949	0.274847	0.34311	0.0852952	0.0504778	39	47	43	27	32	39	20	0.6	0.111111	0.333333	0.361111	0.245572	1	0.378208	1	0.180497	0.104316	0.087575	0.0393455	0.0615082	0.608337	0.304357	0.566474	1.05125e-17	4.43825e-15	0.0185435	0.0140216
2	1	0	1	1	0	7	1	0	0.800569	0.6827	0.572134	0.833587	0.0621331	0.969837	0.788511	0.541512	1	1	0.221707	0.578862	0.0807677	0.83151	39	47	43	27	32	39	20	0.6	0.111111	0.333333	0.361111	0.775258	0.945636	0.179456	0.904844	0.110781	0.179085	1	1	0.413278	0.295859	0.00481644	0.239904	0.00686496	0.0893403	1	1
2	1	0	1	1	1	8	0.275815	0.604896	1	0.462888	0.511746	1	0.123066	1	0.366463	0.223344	0.887981	0.2213	0	0.888688	0	0.719179	39	47	43	27	32	39	20	0.6	0.111111	0.333333	0.361111	0.47203	0.978832	0.513661	0.951895	9.4948e-17	0.232764	0.848369	0.592335	0.244696	0.506797	0.442988	0.422865	0.0216679	0.0836052	0.720874	0.393005
2	2	0	0	0	0	3	0	0.619541	0	0.670519	0.258542	0.190214	0	0.514707	0.0803861	0.143563	0	0.425006	0.740718	0.103188	0.351041	0.106478	39	47	43	27	32	39	20	0.6	0.0833333	0.361111	0.277778	1	0.0706591	0.0257083	0.169447	0.717403	1	1.83679e-15	0.21623	1	2.36915e-16	0.203175	5.66876e-17	1	1	0.0598253	0.123956
2	2	0	0	0	1	1	0.486473	0.460801	0.525288	0.552212	0.349651	0.78732	0.334208	0.672381	0.372549	0.0629948	0.687685	0.533878	0.616677	0.207644	0.340553	0.53593	39	47	43	27	32	39	20	0.6	0.0833333	0.361111	0.277778	0.466421	0.0168512	1	0.0117152	0.719905	0.790817	0.0389284	0.281295	0.561839	1	1	1	0.775641	0.782502	0.00270579	0.146928
2	2	0	0	1	0	6	0.119884	1	0.231788	0	0	0.582302	0.396186	0.369017	0.256499	0.100862	0.301629	0	0.566366	0.0272758	0.668055	0.25589	39	47	43	27	32	39	20	0.6	0.0833333	0.361111	0.277778	0.383547	0.16992	0.16717	0.321069	1	0.490207	0.112162	0.19585	0.547693	0.474069	0.235636	0.451417	0.86443	0.765512	0.0663544	0.0669181
2	2	0	0	1	1	4	0.399653	0.852381	0.0492517	0.322952	0.239187	0	0.00659734	0	0	0	0.215832	0.404885	0.742402	0.106111	0.466766	1.97957e-22	39	47	43	27	32	39	20	0.6	0.0833333	0.361111	0.277778	0.279323	1.34646e-16	0.795922	5.10468e-17	9.11466e-17	0.284234	0.773332	0.353056	0.381191	0.984734	0.838995	0.976805	0.802365	0.688977	0.5038	0.144544
2	2	0	1	0	0	2	0.226866	0.488917	0.393341	0.437189	0.248913	0.7096	0.618938	0.91347	0.510756	0.225658	0.53066	0.9925	1	0	1	0.334073	39	47	43	27	32	39	20	0.6	0.0833333	0.361111	0.277778	0.283024	0.975376	7.04457e-16	0.978302	0.583189	0.143349	0.113858	0.0259757	0.125731	0.693856	5.997e-16	0.637018	0.183648	0.273341	1.1292e-14	3.62649e-15
2	2	0	1	0	1	5	0.453506	0.209938	1	0.707251	0.479798	1	0.451654	1	0.948947	0.457371	0.783689	1	0.139734	0.40452	0	1	39	47	43	27	32	39	20	0.6	0.0833333	0.361111	0.277778	0.712134	0.890033	0.635338	0.872686	0.29278	0.601039	0.125939	1.10021e-15	0.427621	0.514348	0.47048	0.502447	0.362573	0.668068	0.208778	0.0627111
2	2	0	1	1	0	7	1	0	0.519336	1	1	0.164115	0.554214	0.896678	1	1	0.311625	0.653397	0.262683	0.471855	0.0125282	0.887657	39	47	43	27	32	39	20	0.6	0.0833333	0.361111	0.277778	0.130928	0.954608	0.196706	0.984522	0.277562	2.10707e-15	0.821839	1	1.11192e-17	0.595749	0.129776	0.605017	9.72097e-18	3.64821e-15	0.983662	1
2	2	0	1	1	1	8	0.488322	0.387202	0.766822	0.426886	0.230555	0.916996	1	0.706766	0.92738	0.464496	1	0.267163	0	1	0.111692	0.709293	39	47	43	27	32	39	20	0.6	0.0833333	0.361111	0.277778	1.97141e-17	1	0.0482427	1	0.0774727	0.112925	1	0.659529	0.0076685	0.747922	0.0663572	0.682345	0.0937255	0.07641	1	0.471034
2	3	1	0	0	0	6	0.255777	0.835075	0.0415893	0.0378838	0.147269	0	0.139096	1	0	0	0.30299	0.0127531	0.771966	0.472639	0.0019309	3.4948e-22	39	47	43	27	32	39	17	0.65	0.166667	0.388889	0.388889	0.76534	1.45381e-16	0.265818	0.188995	0.157784	0.158395	2.87673e-15	1.44623e-15	1	2.16645e-16	0.187791	5.35698e-17	1	1	0.243177	0.0743937
2	3	1	0	0	1	1	0.583838	0.703494	0.633325	0.445587	0.584838	0.468543	0.0256914	0	0.1411	0.0989331	0.0212319	0.858693	0.513126	0.182294	0.0381413	0.428986	39	47	43	27	32	39	17	0.65	0.166667	0.388889	0.388889	1	0.0198042	0.858807	0.0855479	1	1	0.0190467	0.349328	0.866009	1	0.952977	1	0.722153	0.89704	0.180484	0.319116
2	3	1	0	1	0	3	1	0	0.330702	0.265821	0.418687	0.431839	0.0304625	0.663908	0.407827	0.446605	0	0.168012	0.729321	0	0.0700188	0.1649	39	47	43	27	32	39	17	0.65	0.166667	0.388889	0.388889	0.765483	0	3.99556e-16	4.94729e-17	0.282815	0.693896	0.355239	0.602061	0.771629	0.876215	0.0870788	0.842432	0.654289	0.756587	0.184959	0.443259
2	3	1	0	1	1	8	0.909351	0.501123	0	0.102377	0.186509	0.460534	0	0.347658	0.315388	0.320582	0.469812	0.266002	1	0.178991	0.166509	0.451446	39	47	43	27	32	39	17	0.65	0.166667	0.388889	0.388889	0.963468	0.141106	1	0.27056	7.56931e-17	0.534094	1	0.667235	0.799257	0.951866	1	0.92449	0.830549	0.912091	1	0.512333
2	3	1	1	0	0	2	0.404021	0.50286	0.701148	0.0436393	0	1	1	0.304693	1	1	0.738696	0.0573659	0.120276	0.46076	0.107795	0.614293	39	47	43	27	32	39	17	0.65	0.166667	0.388889	0.388889	0.113028	1	0.141858	0.994548	0.31704	0.0674082	0.0396883	0.0492544	0.0336637	0.663679	4.19429e-16	0.589527	0.0522548	0.0692273	2.52546e-14	7.35666e-15
2	3	1	1	0	1	5	0.826861	0.247733	0.662299	0	0.0563683	0.213509	0.179512	0.651086	0.362941	0.257891	0.973723	0.250751	0.384573	0.280686	0	1	39	47	43	27	32	39	17	0.65	0.166667	0.388889	0.388889	0.712352	0.964169	0.358037	1	0.466727	0.265066	0.282419	0.148783	0.190126	0.597791	0.293091	0.585393	0.0585314	0.182062	0.382176	0.161799
2	3	1	1	1	0	6	0.763538	1	0.0717306	1	1	0.174885	0.214971	0.637799	0.192144	0.196269	0.90588	1	0	1	0.0253794	0.39393	39	47	43	27	32	39	17	0.65	0.166667	0.388889	0.388889	0.641345	0.934944	0.0521588	0.927569	0.4033	0.119804	0.19015	1	0.0522434	0.554894	0.0265767	0.498866	9.22173e-18	0.031836	0.0233652	1
2	3	1	1	1	1	4	0	0.688905	1	0.0151465	0.148589	0.996306	0.346139	0.0517127	0.789596	0.440807	1	0	0.330542	0.562299	1	0.716298	39	47	43	27	32	39	17	0.65	0.166667	0.388889	0.388889	4.63423e-17	0.911772	0.327685	0.929886	0.265408	2.28051e-15	0.865672	0.873002	1.38761e-17	0.511462	0.28597	0.496494	0.0376272	4.51011e-15	0.699362	0.742636
2	4	1	0	0	0	7	0.496694	1	0	0	0.076948	0.318114	0.0911278	0.658717	0	0	0.177573	0.0687599	0.221215	0.561114	0.0266993	3.87418e-22	39	47	43	27	32	39	17	0.75	0.0833333	0.527778	0.25	1	0.0084995	0.577846	0.00207205	0.458125	0.714219	0.0717314	2.06083e-15	1	0.605918	0.94452	0.743982	1	1	0.538702	0.246875
2	4	1	0	0	1	1	0.80896	0	0.585485	1	1	0.799218	0.346994	0.182559	1	1	0.5944	0.473528	0.46827	0.197079	0.722656	0.241304	39	47	43	27	32	39	17	0.75	0.0833333	0.527778	0.25	0.805615	0.0411654	1	7.84368e-17	1	0.900748	0.0624055	0.00895397	0.932876	0.227891	1	0.270059	0.929728	0.876288	0.486214	0.227996
2	4	1	0	1	0	3	0.626124	0.88664	0.211262	0.110713	0	0.522841	0.228078	0.0744061	0.187598	0.179682	0	0	0.626075	0	0.641795	0.0202705	39	47	43	27	32	39	17	0.75	0.0833333	0.527778	0.25	0.377242	0.00879713	0.267233	0.0347789	0.473731	1	4.11604e-15	0.0006077	0.701395	0.600469	0.539799	0.679674	0.779083	0.73609	0.193181	0.153492
2	4	1	0	1	1	7	0.0945169	0.673294	0.160934	0.29864	0.251208	0.408259	0.349593	0.563859	0.153816	0.216603	0.310105	0.359684	1	0.0877745	0.947082	0.229304	39	47	43	27	32	39	17	0.75	0.0833333	0.527778	0.25	0.693439	1.71223e-16	0.814021	0.00622628	0.104463	0.876634	0.0215384	0.25872	0.667862	4.83919e-16	0.664594	1.42908e-16	0.733876	0.674218	0.23925	0.258136
2	4	1	1	0	0	4	0	0.88132	0.247592	0.285538	0.465128	0	0.35214	1	0.0656953	0.247634	0.506672	0.696939	0.0794396	0.484163	0.634006	0.660554	39	47	43	27	32	39	17	0.75	0.0833333	0.527778	0.25	0.457684	0.772085	0.138107	0.657683	0.639727	0.600219	0.0338616	0.0279352	0.162022	0.211903	0.278466	0.212841	0.0717908	0.217141	0.0817213	0.138765
2	4	1	1	0	1	1	0.261688	0.880275	0.182543	0.515905	0.425117	0.432045	0.551991	0	0.243498	0.298301	1	0.64136	0	1	0	0.344663	39	47	43	27	32	39	17	0.75	0.0833333	0.527778	0.25	3.00581e-17	0.942523	1.04483e-15	0.918305	0.323078	0.0521593	0.0489501	0.0207565	0.00420606	0.803286	0.0513242	0.795231	9.44946e-18	0.0189355	2.98023e-14	1.10553e-14
2	4	1	1	1	0	5	0.348647	0.865306	0.43137	0.662785	0.668856	0.435602	1	0.857734	0.182476	0.207033	0.238203	1	0.643551	0.0908506	0.19533	1	39	47	43	27	32	39	17	0.75	0.0833333	0.527778	0.25	0.533104	1	0.253305	1	0.0899329	0.493396	0.954066	0.838604	0.202922	1	0.218734	1	0.158167	0.296325	1	1
2	4	1	1	1	1	2	1	0.227688	1	0.461834	0.261075	1	0	0.451325	0.62872	0.436593	0.702043	0.263716	0.86026	0.146097	1	0.705899	39	47	43	27	32	39	17	0.75	0.0833333	0.527778	0.25	0.0469025	0.965984	0.186938	0.898064	9.1998e-17	5.06939e-15	1	1	1.23687e-17	0.823899	1.00674e-15	0.707095	0.00962699	4.05278e-15	0.570563	0.750236
3	1	0	0	0	0	5	0.986857	0.444852	0.197372	0	0	0.415616	0.26737	0.420625	0.00698755	0	0.0730084	0	0.424662	0.351382	0.694447	0.147802	34	40	33	31	41	36	20	0.575	0.333333	0.416667	0.583333	0.540439	0	4.7429e-16	4.4448e-17	0.367248	0.548009	1.75689e-15	7.53169e-16	0.6737	0.993457	0.33488	0.942167	0.889842	0.80087	0.0291204	0.00537913
3	1	0	0	0	1	6	0.549531	0.601483	0.267067	0.325305	0.395346	0.498142	0	0.352106	0.224881	0.264762	0.319122	0.128583	0.582852	0.278325	0.683668	0.413203	34	40	33	31	41	36	20	0.575	0.333333	0.416667	0.583333	0.841762	0.186912	0.643553	0.227549	0.445062	0.984872	0.0248239	0.00464551	1	0.743719	0.300295	0.518831	1	1	0.106158	0.01865
3	1	0	0	1	0	4	1	1	0	0.0212377	0.114313	0.313167	0.0693635	0.368782	0	0.024207	0	0.222189	0.463875	0	1	2.64932e-22	34	40	33	31	41	36	20	0.575	0.333333	0.416667	0.583333	0.343652	1.19227e-16	0.147396	0.0106596	0.273296	0.122296	0.0340492	0.268419	0.560007	1	0.602969	1	0.827618	0.617097	8.59799e-15	0.0907663
3	1	0	0	1	1	7	0.146595	0.489003	0.517299	0.897963	0.946637	0	0.221293	0	1	1	0.330038	0.244425	0.406809	0.138061	0.669365	1	34	40	33	31	41	36	20	0.575	0.333333	0.416667	0.583333	2.44023e-17	0.316456	1	0.337554	4.94753e-17	0.103476	0.0121035	0.0709027	0.323252	4.69748e-16	1	1.18841e-16	0.663251	0.490466	0.0425619	2.89154e-15
3	1	0	1	0	0	1	0	0	1	0.639168	0.799805	1	0.52336	0.592676	0.50018	0.963803	1	1	1	0.831307	0.0535049	0.724619	34	40	33	31	41	36	20	0.575	0.333333	0.416667	0.583333	0.732014	1	0.304568	1	0.625077	0.381778	0.236738	0.157923	0.158572	0.723144	5.25294e-16	0.510418	0.134835	0.342936	0.258359	0.108114
3	1	0	1	0	1	3	0.218207	0.41395	0.390855	0.823618	1	0	0	0	0	0	0.622053	0.292644	0.335354	0.423793	0	0.600567	34	40	33	31	41	36	20	0.575	0.333333	0.416667	0.583333	0.576019	0.887482	0.406949	0.863833	0.735937	0.523546	0.075777	0.0213207	0.148261	0.216244	0.124322	0.0782771	0.132412	0.324719	0.140722	0.041311
3	1	0	1	1	0	7	0.130162	0.572448	0.448268	1	0.854156	0.625865	0.446744	1	0.332397	0.990215	0.848153	0.480955	0.558344	1	0.562454	0.588129	34	40	33	31	41	36	20	0.575	0.333333	0.416667	0.583333	0.157205	0.896919	0.28288	0.89881	0.131667	4.88004e-15	0.720722	0.809081	1.95062e-17	0.266139	0.29597	0.206112	0.111	6.29642e-15	0.534172	0.68236
3	1	0	1	1	1	4	0.578189	0.299131	0.284467	0.759162	0.983052	0.513327	1	0.306105	0.216079	0.382359	0.867253	0.263714	0	0.52898	0.312008	0.913762	34	40	33	31	41	36	20	0.575	0.333333	0.416667	0.583333	1	0.908587	0.436809	0.89067	1	1	1	1	0.298405	0.334051	0.225595	0.190904	1.24988e-17	0.294605	1	1
3	2	0	0	0	0	1	0.806129	0.735637	0	0.661713	0.466363	0.144187	0.202711	0	0.324896	0.425906	0	0.80006	0.975154	0.220242	0.166478	3.47667e-22	34	40	33	31	41	36	20	0.6	0.388889	0.527778	0.5	1	0	4.98563e-16	5.16449e-17	0.352771	0.480434	0.0113942	0.0146513	1	0.975728	0.913491	0.998795	0.992155	1	0.0457248	4.292e-15
3	2	0	0	0	1	5	0.509452	0.455811	0.586876	0.196214	0.220078	0.625826	0.40532	0.560798	0.237544	0.412507	0.255012	0.200482	0.653454	1	0.741715	0.943509	34	40	33	31	41	36	20	0.6	0.388889	0.527778	0.5	0.51664	0.00877295	0.101736	0.0663605	0.316883	0.700574	0.0112616	7.67592e-16	0.920009	0.945627	0.457005	0.919706	0.868448	0.961414	0.0509308	0.0112255
3	2	0	0	1	0	2	0.592095	1	0.328155	0	0	0	0.436638	0.336796	0.288937	0.469407	0.118179	0	0.792095	0.0910196	0.930197	0.219589	34	40	33	31	41	36	20	0.6	0.388889	0.527778	0.5	0.224238	1.39909e-16	0.250736	0.0216727	4.74421e-17	3.24616e-15	1.33004e-15	0.234673	0.423934	1	0.915999	1	0.720581	0.552232	6.01968e-15	0.0941167
3	2	0	0	1	1	6	0.259911	0.236071	0.215166	0.106923	0.167328	0.227668	0	1	0	0	0.123698	0.197538	1	0.322313	0.384312	0.784881	34	40	33	31	41	36	20	0.6	0.388889	0.527778	0.5	0.459394	0.2365	1	0.338241	0.216735	0.286598	0.0137274	0.243884	0.869706	3.40063e-16	1	7.8604e-17	1	0.992124	0.0734033	0.132346
3	2	0	1	0	0	8	1	0.384446	0.503557	0.144026	0.0501318	0.471232	0.901151	0.00311454	0.220521	0.273244	0.202906	0.151958	0.146008	0.493027	0.0130074	0.300375	34	40	33	31	41	36	20	0.6	0.388889	0.527778	0.5	0.465225	0.991949	0.22719	0.999392	0.602888	0.376793	0.0527642	0.0239422	0.355904	0.42647	9.67275e-16	0.4248	0.0483637	0.341485	0.0920451	0.0582839
3	2	0	1	0	1	3	0	0	1	0.171328	0.22193	0.670382	1	0.59852	1	1	1	0.125186	0.362545	0.781542	1	0.910841	34	40	33	31	41	36	20	0.6	0.388889	0.527778	0.5	4.23088e-17	0.937861	0.496886	0.925444	0.74236	0.463834	0.0885948	0.0403653	0.260715	0.278585	0.26131	0.272511	0.0444275	0.189136	0.115929	0.0618258
3	2	0	1	1	0	4	0.457613	0.419549	0.342757	1	0.831105	0.549024	0.193721	0.0833133	0.549802	0.789822	0.28038	0.344086	0.771825	0	0.5572	1	34	40	33	31	41	36	20	0.6	0.388889	0.527778	0.5	0.11262	0.933809	0.545642	0.954279	0.536427	0.0517302	1	1	2.52245e-17	0.187837	0.609716	0.26753	1.44851e-17	7.71837e-15	0.795182	1
3	2	0	1	1	1	1	0.514496	0.355303	0.275926	0.955687	1	1	0.588548	0.115172	0.58925	0.429141	0.289037	1	0	0.342508	0	0.712187	34	40	33	31	41	36	20	0.6	0.388889	0.527778	0.5	0.340674	1	0.837207	1	1	1	0.993582	0.595661	0.546575	0.392784	0.61597	0.36149	0.0877914	0.381973	1	0.943717
3	3	1	0	0	0	3	0.602694	0.873373	0	1	1	0.33019	0.375236	1	0	0.0845724	0.264587	0.685152	0.677293	0.0268269	0.63123	0.320707	34	40	33	31	41	36	20	0.525	0.361111	0.444444	0.555556	0.775435	1.26122e-16	0.265977	0.0282773	0.163475	0.0882257	0.0144189	0.000511471	1	1	0.379226	1	1	1	0.0964062	0.0339602
3	3	1	0	0	1	7	0.464094	0.808967	0.392957	0	0	0.295204	0.295526	0	0.0145931	0	0.0404668	0.278262	0.991385	0	1	0.302943	34	40	33	31	41	36	20	0.525	0.361111	0.444444	0.555556	0.146406	0.211115	0.637757	0.173657	1	0.074094	2.43328e-15	8.93209e-16	0.350438	0.0736588	0.939532	0.158011	0.643937	0.381689	1.63882e-14	4.13511e-15
3	3	1	0	1	0	8	1	1	0.293705	0.0607534	0.0611467	0.13638	0.293139	0.199166	0.103955	0.194201	0.0566106	0.265297	1	0.0294193	0.422693	2.89096e-22	34	40	33	31	41	36	20	0.525	0.361111	0.444444	0.555556	3.31113e-17	0	4.34644e-16	4.75583e-17	0.194899	8.50321e-15	0.077356	0.0283404	0.63987	0.998232	0.0258907	0.945123	0.793924	0.550483	0.0243543	0.020535
3	3	1	0	1	1	6	0	0.787403	0.0819009	0.452129	0.404849	0.336128	0.795422	0.880308	0.0461285	0.0642738	0	0.703473	0	0.12249	0.248163	0.222226	34	40	33	31	41	36	20	0.525	0.361111	0.444444	0.555556	0.244373	0.310938	1	0.270107	7.99766e-17	0.135425	0.0851085	0.0785299	0.676337	2.61323e-16	1	6.98468e-17	0.857605	0.709267	0.0877065	0.0492033
3	3	1	1	0	0	5	0.229012	0.106758	1	0.263288	0.241221	1	0.773138	0.407724	1	1	1	0.884281	0.793819	0.849774	2.39391e-05	0.566134	34	40	33	31	41	36	20	0.525	0.361111	0.444444	0.555556	0.986777	1	0.12998	0.937288	0.64934	0.258892	0.075551	0.0224141	0.0492473	0.692233	4.9445e-16	0.601997	0.159332	0.281445	0.260228	0.0702935
3	3	1	1	0	1	2	0.840952	0.463419	0.803642	0.142781	0.178094	0	0.149523	0.666379	0.162728	0.239867	0.819877	0.366099	0.280208	0.704784	0	0.887009	34	40	33	31	41	36	20	0.525	0.361111	0.444444	0.555556	0.673519	0.951431	0.565232	0.908379	0.845102	0.383521	0.107558	0.0203486	4.31319e-17	0.5851	0.481193	0.547991	0.161118	0.14515	0.26828	0.0636459
3	3	1	1	1	0	5	0.681754	0	0.60455	0.221993	0.273499	0.272164	1	0.515783	0.190537	0.228496	0.381102	0	0.287358	1	0.338003	0.815737	34	40	33	31	41	36	20	0.525	0.361111	0.444444	0.555556	0.994769	0.991252	0.640293	1	0.940658	1	1	0.409266	0.236807	0.646911	0.773559	0.657961	0.177782	0.514146	1	0.410924
3	3	1	1	1	1	8	0.359486	0.198325	0.635251	0.733932	0.507391	0.273134	0	0.545556	0.532907	0.713954	0.735889	1	0.297454	0.688473	0.080978	1	34	40	33	31	41	36	20	0.525	0.361111	0.444444	0.555556	1	0.947433	0.350401	0.901299	0.706421	0.402722	0.446506	1	0.0830556	0.565601	0.204021	0.530639	1.55742e-17	9.05909e-15	0.621444	1
3	4	1	0	0	0	6	0.112	0.826364	0.0100598	0.251774	0.218492	0.424818	0.456956	0	0.458511	0.376502	0.573323	0.050451	0	0.640281	0.54466	0.17896	34	40	33	31	41	36	20	0.525	0.472222	0.416667	0.583333	0.179422	0.0317266	0.83288	5.08638e-17	1.52631e-16	1	0.00741291	0.00517053	0.892895	1	0.728123	0.986768	0.783065	0.786193	0.0287483	0.0957803
3	4	1	0	0	1	3	0	0.714551	0	0	0	0.0181907	0	0.699247	0	0.00457127	0	0.0305702	0.178437	0.0313755	1	0.44359	34	40	33	31	41	36	20	0.525	0.472222	0.416667	0.583333	6.5219e-17	1.37088e-16	1	0.0265809	0.00749751	0.308124	2.71528e-15	2.13837e-15	0.665604	0.936488	0.723989	0.886351	0.824885	0.729872	1.83266e-14	1.39326e-14
3	4	1	0	1	0	1	0.404782	1	0.0494604	0.448782	0.200337	0.295526	0.030928	0.928554	0.0448055	0.146948	0.361829	0.582478	1	0	0.285452	0.139413	34	40	33	31	41	36	20	0.525	0.472222	0.416667	0.583333	0.649376	0.000972699	0.880104	0.0106873	0.982291	0.83384	0.00716635	0.0165498	0.849676	0.959608	1	1	0.811934	0.79123	0.072559	0.097016
3	4	1	0	1	1	4	1	0.642528	0.13244	0.503194	0.327612	0	0.0359967	0.7334	0.0395258	0	0.236265	0	0.399862	0.18728	0.349569	3.33257e-22	34	40	33	31	41	36	20	0.525	0.472222	0.416667	0.583333	0.911581	0.024714	0.958439	0.0136689	0.00338487	0.429022	0.0176867	0.645918	1	0.989498	0.76791	0.95796	1	1	0.115886	0.502101
3	4	1	1	0	0	2	0.303752	0.224609	0.578563	0.783461	0.571086	1	1	1	1	0.723932	1	0.389605	0.790244	0.0403528	0	0.42494	34	40	33	31	41	36	20	0.525	0.472222	0.416667	0.583333	1	0.979233	1.03439e-15	0.940811	0.850448	0.505182	0.151727	0.116874	0.260271	0.00450504	7.1342e-16	0.117511	0.160928	0.430441	0.186467	0.173594
3	4	1	1	0	1	7	0.0659554	0.163591	0.519316	0.728556	0.395597	0.784788	0.324915	0.712153	0.585627	0.749481	0.260452	0.736894	0.537802	0.0767544	0.0252964	0.705742	34	40	33	31	41	36	20	0.525	0.472222	0.416667	0.583333	0.692964	0.981518	0.638719	0.92162	0.434842	0.466931	0.109667	0.0485439	0.357829	5.61329e-16	0.0872939	1.15519e-16	0.215417	0.431931	0.240989	0.186939
3	4	1	1	1	0	7	0.207831	0	0.459621	1	1	0.0220452	0.800987	0.346245	0.717171	1	0.075487	0.628153	0.293436	0.619463	0.0416659	0.288028	34	40	33	31	41	36	20	0.525	0.472222	0.416667	0.583333	0.193046	1	0.0100397	0.980531	0.579951	5.02822e-15	0.172404	1	2.2549e-17	0.166549	0.0733893	0.263062	1.30725e-17	5.71664e-15	0.0385044	0.794362
3	4	1	1	1	1	3	0.142268	0.461471	1	0.849805	0.552026	0.588732	0.136794	0.780669	0.675975	0.531471	0.422501	1	0.447261	1	0.0130301	1	34	40	33	31	41	36	20	0.525	0.472222	0.416667	0.583333	0.783647	0.989609	0.666659	1	1	0.798895	1	0.831866	0.441979	0.0310149	0.650216	0.224031	0.190145	0.475386	1	1
4	1	0	0	0	0	2	0.898069	0.36389	0.208826	0	0.176634	0.196838	0.378057	0.084179	0.429204	0.148452	0	0.345834	0.691915	0.187167	0.0435527	0.158875	27	36	41	27	35	43	16	0.65	0.305556	0.472222	0.555556	1	1.6037e-16	9.18272e-16	7.48179e-17	0.360656	0.290164	0.000929602	0.00409393	1	4.30837e-16	0.0595013	1.80246e-16	1	0.982135	0.0571737	0.0102504
4	1	0	0	0	1	5	0	0	0	0.151456	0.29913	0.79442	0.208541	1	0.468307	0.154619	1	1	1	0	0.575227	1	27	36	41	27	35	43	16	0.65	0.305556	0.472222	0.555556	0.521158	0.0489769	0.656745	0.0531982	0.30503	0.390317	0.000795857	4.31103e-16	0.82513	0.236915	0.251831	0.175778	0.914795	0.867606	0.0504808	0.00692136
4	1	0	0	1	0	8	0.814867	1	0.430587	0.0159477	0.175163	0.0655016	0.0794858	0.098544	0	0	0.102113	0	0.638145	0.043493	0.404563	8.63903e-23	27	36	41	27	35	43	16	0.65	0.305556	0.472222	0.555556	0.584809	0.0204486	0.283156	0.0390583	0.413354	0.710774	4.96246e-16	0.162691	0.778179	0.30078	1.51967e-15	0.370249	0.805699	0.793278	0.0383647	0.123657
4	1	0	0	1	1	6	0.435507	0.918023	0.29642	0.172866	0.332229	0.94559	0.524355	0.237011	1	1	0.318581	0.973957	0.484631	0.428181	0.498258	0.751409	27	36	41	27	35	43	16	0.65	0.305556	0.472222	0.555556	0.798075	0.113114	1	0.124531	1	1	1	1	0.921388	0.438357	0.608847	0.546551	0.715316	1	1	1
4	1	0	1	0	0	3	1	0.783883	0.0140942	1	1	0.208498	0.498217	0	0.48889	0.356688	0.332551	0.620233	0.142247	0.198873	0.22862	0.122386	27	36	41	27	35	43	16	0.65	0.305556	0.472222	0.555556	0.261739	0.898151	0.621504	0.874196	0.238227	0.230834	0.000725931	0.00763897	0.175195	0.598963	0.668208	0.541609	0.1705	0.367582	0.0174146	0.00107537
4	1	0	1	0	1	1	0.604718	0.896874	0.213527	0.469011	0.524243	1	0	0.306469	0.808113	0.440928	0.176273	0.296304	0.0443147	0.480228	0.0164531	0.332082	27	36	41	27	35	43	16	0.65	0.305556	0.472222	0.555556	0.350498	0.982038	0.681343	1	0.345456	0.248483	0.00563207	0.0143238	0.165132	0.854091	0.758119	0.90746	0.0933019	0.237373	0.0224462	3.08575e-15
4	1	0	1	1	0	4	0.490322	0.790664	0.537135	0.00284392	0	0	0.0409641	0.084774	0.276512	0.383834	0.496317	0.34275	0	1	0	0.208512	27	36	41	27	35	43	16	0.65	0.305556	0.472222	0.555556	1.71066e-17	1	0.309912	0.998777	0.186189	2.30133e-15	0.0178571	0.246508	1.11143e-17	1	0.978228	1	9.46312e-18	3.91781e-15	3.78794e-15	0.248066
4	1	0	1	1	1	2	0.412372	0.774281	1	0.127294	0.353505	0.790656	1	0.404767	0.704744	0.681938	0.626028	0.307146	0.722112	0.967154	1	0.654753	27	36	41	27	35	43	16	0.65	0.305556	0.472222	0.555556	0.107893	0.850552	0.959042	0.812691	3.76458e-17	0.107557	0.0468638	0.175822	0.106201	0.415488	1	0.286118	0.147226	0.203149	0.0811663	0.202471
4	2	0	0	0	0	7	0	0	0.253465	0.107372	0.150191	1	1	0.760311	0.657422	0.452292	1	0.353338	1	0.297739	0.187521	1.43821e-22	27	36	41	27	35	43	16	0.475	0.305556	0.388889	0.555556	1	0.258871	0.0930003	0.303831	0.846026	1	0.854861	0.0765742	1	0.124001	6.65611e-16	0.142909	1	1	0.989491	0.502089
4	2	0	0	0	1	7	0.544567	0.173698	0.908663	0.135431	0.102196	0.954254	0.624277	0.806917	1	1	0.0474001	0.395111	0.848671	0.28786	0.197918	0.56019	27	36	41	27	35	43	16	0.475	0.305556	0.388889	0.555556	0.889657	0.242798	0.453061	0.315428	0.714519	0.7633	1	0.0422816	0.905283	3.1258e-16	0.38382	8.53189e-17	0.963517	0.851356	1	0.439282
4	2	0	0	1	0	3	1	0.745706	0.0674654	0	0	0	0.274258	0	0	0	0.078723	0	0.828763	8.67124e-05	0.362944	0.00366501	27	36	41	27	35	43	16	0.475	0.305556	0.388889	0.555556	0.0395848	1.30067e-16	5.09519e-16	5.47509e-17	0.479263	0.114339	2.63968e-14	2.75366e-15	0.174688	0.977433	0.0485021	0.989026	0.510899	0.242632	3.82328e-14	1.62978e-14
4	2	0	0	1	1	2	0.687405	0.671332	1	0.151191	0.159996	0.70255	0.336669	1	0.563556	0.642292	0.0952563	1	0.505655	0	0.863248	1	27	36	41	27	35	43	16	0.475	0.305556	0.388889	0.555556	0.313397	0.122765	1	0.143037	0.115936	0.20238	0.158384	0.864475	0.286547	1	1	1	0.593946	0.402757	0.266777	0.575298
4	2	0	1	0	0	8	0.915996	0.721162	0.518196	0.471615	0.592641	0.865249	0.358127	0.0404255	0.799749	0.967551	0.0748508	0.730787	0.765196	0.273362	1	0.00689678	27	36	41	27	35	43	16	0.475	0.305556	0.388889	0.555556	0.522427	0.926674	0.24311	0.871203	1	0.355055	0.655186	0.0601431	0.209147	0.336415	0.182812	0.229733	0.14298	0.338673	0.497022	0.257613
4	2	0	1	0	1	5	0.514711	0.544092	0.87117	0.254975	0.23416	0.86113	0	0.614351	0.713867	0.742262	0	0.335199	0	0.791229	0.0935717	0.446146	27	36	41	27	35	43	16	0.475	0.305556	0.388889	0.555556	8.47598e-18	0.869638	0.20969	0.845846	7.76061e-17	2.03474e-15	0.592343	0.0394938	7.53154e-18	0.225604	0.123996	0.179701	0.0114016	3.24606e-15	0.333124	0.0800169
4	2	0	1	1	0	1	0.498693	1	0	1	1	0.652431	0.0796832	0.568351	0.320691	0.673869	0.148451	0.467982	0.254482	0.564423	0.575218	0.0180733	27	36	41	27	35	43	16	0.475	0.305556	0.388889	0.555556	0.0874104	0.854212	0.449515	0.807969	0.119062	0.102282	0.898291	0.583928	0.0570921	0.17034	0.29469	0.133529	0.10912	0.108615	0.348919	0.435399
4	2	0	1	1	1	4	0.813886	0.123736	0.712923	0.60334	0.697327	0.332919	0.776105	0.812816	0.459898	0.468848	0.538931	0.449602	0.225726	1	0	0.709486	27	36	41	27	35	43	16	0.475	0.305556	0.388889	0.555556	0.0370951	1	0.44699	1	0.498485	0.134668	0.696054	1	0.0274306	0.557944	0.358529	0.476128	1.01061e-17	0.0204819	0.408005	1
4	3	1	0	0	0	6	0.854802	0.541765	0.301409	0.874484	0.823244	0.346423	0.458056	0.64601	0.561734	0.679401	0	0.220175	0.889869	0.473309	0.0553168	0.103013	27	36	41	27	35	43	16	0.425	0.416667	0.444444	0.388889	1	0.0295437	0.525151	0.00303362	0.588867	1	0.569963	0.0269138	1	3.44658e-16	0.158595	8.45754e-17	1	1	1	0.80095
4	3	1	0	0	1	5	0	0	1	0	0	0.837033	1	0.946044	0.915234	0.642282	1	1	1	0.15291	0.874564	1	27	36	41	27	35	43	16	0.425	0.416667	0.444444	0.388889	0.650965	1.69872e-16	0.3291	7.79059e-17	1	0.381861	0.0524573	3.04241e-15	0.497746	1	0.391389	1	0.736044	0.577027	0.201472	0.253841
4	3	1	0	1	0	7	1	0.852505	0.357487	0.334121	0.320485	0	0.0195191	1	0	0	0.274457	0	0.870243	0.289909	1	1.07001e-22	27	36	41	27	35	43	16	0.425	0.416667	0.444444	0.388889	0.255493	0.0702677	0.268224	0.139246	0.474404	0.256412	0.26995	0.017026	0.532618	0.626448	0.223118	0.614689	0.865259	0.646736	0.638904	0.489104
4	3	1	0	1	1	3	0.706058	0.523549	0.505453	0.141232	0.0170422	0.984227	0.705246	0.931552	1	1	0.586169	0.484992	0.731789	0	0.0346989	0.87506	27	36	41	27	35	43	16	0.425	0.416667	0.444444	0.388889	0.634651	0.0875989	1	0.0384516	0.149604	0.189081	0.1121	1	0.40601	0.586099	1	0.576778	0.659955	0.581915	0.300376	1
4	3	1	1	0	0	8	0.796355	1	0.511774	0.752114	0.792186	0.61511	0.434456	0	0.401879	0.658585	0.812648	0.200801	0.727993	0.382713	0.742165	0.221503	27	36	41	27	35	43	16	0.425	0.416667	0.444444	0.388889	0.372679	0.900013	0.15268	0.8418	0.0730411	0.238507	2.65691e-14	0.055184	0.103021	0.491747	0.0795003	0.428613	0.110452	0.231287	0.0622736	0.117667
4	3	1	1	0	1	1	0.941379	0.735192	0.84098	0.380979	0.483825	0.35457	0.595573	0.601057	0.444747	0.50856	0.89598	0.125621	0	1	0.105214	0.615869	27	36	41	27	35	43	16	0.425	0.416667	0.444444	0.388889	8.8782e-18	0.933957	0.0643837	0.841688	8.31129e-17	0.0107554	0.587142	0.0965218	6.68453e-18	0.552804	0.233387	0.411222	8.76254e-18	3.38513e-15	0.0199938	2.64419e-14
4	3	1	1	1	0	4	0.94711	0.84427	0	0.551785	0.314799	0.389287	0	0.544048	0.17934	0.371887	0.785418	0.284082	0.314247	0.241757	0	0.159117	27	36	41	27	35	43	16	0.425	0.416667	0.444444	0.388889	0.0702078	1	5.92177e-16	1	0.197643	3.57133e-15	1	0.16774	0.0152587	0.710389	6.8869e-16	0.629326	0.0256635	0.0320885	3.81966e-14	0.0761151
4	3	1	1	1	1	6	0.438503	0.858418	0.508051	1	1	1	0.759205	0.888961	0.972946	0.851844	0.842072	0.310955	0.48925	0.510453	0.0477053	0.815199	27	36	41	27	35	43	16	0.425	0.416667	0.444444	0.388889	0.0448309	0.922188	0.214823	0.838974	0.0168991	0.151071	0.128091	0.507868	0.0210422	0.527665	0.161383	0.410923	0.0539796	0.0878715	0.125284	0.431
4	4	1	0	0	0	2	0.653284	0.337036	0.285782	1	0.904519	0.554129	1	0.56284	0.551074	1	0.486194	0.268285	0.998043	0.864981	0.541365	0.0567786	27	36	41	27	35	43	16	0.475	0.361111	0.416667	0.444444	1	0.188684	0.479064	0.360187	1	1	1	0.114519	1	3.08793e-16	0.340633	8.48675e-17	1	1	1	1
4	4	1	0	0	1	7	0.0344483	0.364836	0.689549	0.651039	0.327237	1	0.134604	0.320538	1	0.901212	0.683296	0.807015	0.953015	0	0.539354	1	27	36	41	27	35	43	16	0.475	0.361111	0.416667	0.444444	0.24821	0.0230725	0.998482	0.120596	0.200694	0.318537	0.269414	0.0355641	0.441231	1	0.946373	0.949384	0.777622	0.674553	0.369654	0.454544
4	4	1	0	1	0	2	0.488957	1	0.262987	0.0471898	0.100589	0.060338	0.029381	1	0	0	0.439798	0.134444	0.505746	0.284911	0.387992	8.12481e-23	27	36	41	27	35	43	16	0.475	0.361111	0.416667	0.444444	0.236961	0	5.1249e-16	5.46076e-17	0.898551	0.753547	0.178192	0.0431827	0.423348	0.928396	6.37402e-16	0.927476	0.619059	0.572757	0.273602	0.569357
4	4	1	0	1	1	5	0	0	1	0	0.0917036	0.446595	0.912286	0.236217	0.683709	0.773235	0.912732	1	1	0.55143	0	0.802541	27	36	41	27	35	43	16	0.475	0.361111	0.416667	0.444444	9.39221e-18	1.41728e-16	1	0.105635	0.420131	0.140941	0.396324	6.91759e-15	0.367441	0.977658	1	1	0.736431	0.564422	0.430978	0.444565
4	4	1	1	0	0	3	0.673061	0.623207	0	0.855617	0.513696	0.161948	0.147277	0	0.116153	0.285558	0.31946	0.21241	0.451733	0.886355	0.382245	0.0367682	27	36	41	27	35	43	16	0.475	0.361111	0.416667	0.444444	0.0424971	1	0.296206	1	0.309275	0.119938	0.0764116	0.0543975	0.0397059	0.607355	0.453034	0.456252	0.0280496	0.0354789	0.0667138	0.159915
4	4	1	1	0	1	4	0.679173	0.768308	0.694377	0.579215	0.838796	0.0317514	0	0.871184	0.0299947	0.0392291	1	0.998673	0	0.711979	0.55658	0.342774	27	36	41	27	35	43	16	0.475	0.361111	0.416667	0.444444	0.0462677	0.92426	0.448952	0.862622	5.43029e-17	0.0494341	0.100072	0.0759545	0.0166146	0.307486	0.761348	0.121443	0.067558	0.0780504	0.033051	0.0449487
4	4	1	1	1	0	8	1	0.757549	0.0477076	0.10518	0	0	0.0559637	0.552689	0.00396827	0.0165357	0.768315	0	0.250546	0.734944	1	0.0361688	27	36	41	27	35	43	16	0.475	0.361111	0.416667	0.444444	0.0137871	0.918182	0.324627	0.924316	0.0356066	2.94534e-15	2.68303e-14	0.0739326	7.3992e-18	0.292582	0.293722	0.216822	0.0597752	0.0594499	3.50594e-14	2.93727e-14
4	4	1	1	1	1	1	0.284264	0.563746	0.424469	0.833844	1	0.255673	0.308441	0.267207	0.390903	0.544207	0	0.297107	0.290228	1	0.33822	0.402589	27	36	41	27	35	43	16	0.475	0.361111	0.416667	0.444444	0.0542203	0.892173	0.902055	0.916964	0.15561	0.0760001	0.887533	1	0.0167746	0.289167	0.892023	0.234713	8.76053e-18	3.29084e-15	0.253891	0.546279
5	1	0	0	0	0	1	0.586189	0.1761	0.636324	0	0.00327826	0.391254	0.501219	0.844404	0.114087	0.155567	0.259369	0.0673511	0.320933	0.232755	0.590659	0.029027	33	40	31	22	41	36	23	0.475	0.277778	0.0833333	0.472222	1	1.47516e-16	0.0432755	0.296353	0.766782	1	0.361617	0.298773	0.906412	3.04544e-16	0.197889	7.42938e-17	0.830216	0.992029	0.615372	0.646242
5	1	0	0	0	1	4	0	0	1	0.000969247	0	1	0	0.555616	1	0.62418	0.542245	1	1	0.0393515	0.310738	1	33	40	31	22	41	36	23	0.475	0.277778	0.0833333	0.472222	0.910403	0.013761	0.665082	0.314102	1	0.70366	0.421492	0.0942391	1	0.0626335	0.598756	0.0422833	1	1	1	0.513382
5	1	0	0	1	0	6	1	0.576989	0.596471	0.654005	0.299298	0.25133	0.30423	0.313239	0	0	0	0	0.473483	0.315202	0.883902	3.39518e-23	33	40	31	22	41	36	23	0.475	0.277778	0.0833333	0.472222	0.511573	0.0294586	0.69626	0.321691	0.438255	0.566997	0.206778	0.633178	0.748467	0.476708	0.715283	0.446844	0.994546	0.915234	0.944144	0.949647
5	1	0	0	1	1	2	0.309587	0.427338	0.597305	0.0777499	0.131875	0	0.227973	1	0.0446458	0.120425	0.538901	0.666096	0.82458	0	0.721488	0.682936	33	40	31	22	41	36	23	0.475	0.277778	0.0833333	0.472222	0.39716	0	0.0748378	4.59137e-17	0.378615	0.31849	1	0.826647	0.454446	1	1	1	0.733016	0.649482	0.388792	0.818869
5	1	0	1	0	0	7	0.744108	1	0	0.731204	0.532697	0.443244	1	0	0.325818	0.407304	0.860911	0.137171	0.815816	0.695044	1	0.0447543	33	40	31	22	41	36	23	0.475	0.277778	0.0833333	0.472222	1.5704e-17	0.996579	0.218487	0.984168	0.0462746	1.85662e-15	1.18664e-14	2.59051e-15	0.0348911	0.918735	0.237114	0.738439	0.0973181	0.0651064	4.53446e-14	1.91878e-14
5	1	0	1	0	1	2	0.326576	0.255914	0.619793	1	1	0.600439	0.768919	0.302988	0.908969	1	0.925926	0.930157	0.686434	0.627435	0	0.483	33	40	31	22	41	36	23	0.475	0.277778	0.0833333	0.472222	0.0265794	0.934954	0.49513	0.954058	0.186487	0.0324942	0.284621	0.0694271	9.94822e-18	0.733213	0.290378	0.638272	1.02783e-17	0.0198843	0.0633706	0.00720855
5	1	0	1	1	0	5	0.106594	0.798902	0.815858	0.0494803	0.0721873	0.802611	0.85024	0.2299	0.61991	0.877815	1	0.0870804	0.23017	0.744245	0.208504	0.105473	33	40	31	22	41	36	23	0.475	0.277778	0.0833333	0.472222	0.0917241	1	9.71602e-16	1	0.0615246	0.0308231	0.646976	1	0.0122122	0.904327	8.37451e-16	0.748538	0.00106384	3.77711e-15	0.161245	1
5	1	0	1	1	1	3	0.85937	0.136369	0.705927	0.100653	0.0600194	0.282744	0.739641	0.678545	0.343825	0.291368	0.951858	0.338792	0	1	0.146129	0.294237	33	40	31	22	41	36	23	0.475	0.277778	0.0833333	0.472222	0.0495933	0.858447	1	0.888666	5.209e-17	0.10041	0.47748	0.49925	0.0512356	0.551605	0.868645	0.510145	0.0141892	0.0304734	0.185895	0.479386
5	2	0	0	0	0	4	0.541932	1	0.428097	0.730993	0.584358	0.454978	0.492545	0.277965	0.146949	0.374619	0	0.475811	0.754864	0.277822	0.0114478	6.54916e-23	33	40	31	22	41	36	23	0.475	0.0555556	0.111111	0.416667	0.980488	1.44868e-16	0.117806	6.28695e-17	1	1	0.0811527	0.414717	1	3.09434e-16	0.228899	8.02903e-17	1	1	0.619118	0.576084
5	2	0	0	0	1	8	0	0.511789	0	0.30158	0.330897	0.196195	0.268804	0.9025	0.094382	0.0417574	0.720302	0.855402	0.974353	0	1	1	33	40	31	22	41	36	23	0.475	0.0555556	0.111111	0.416667	1	0.0610435	0.496447	0.116902	0.786489	0.54135	0.130124	0.467573	0.759932	0.173313	0.437733	0.139817	0.926224	0.819156	0.400499	0.454805
5	2	0	0	1	0	1	1	0.971491	0.26936	0.660354	0.574447	0.559676	0.60645	0.300908	0.142247	0.211401	0.203551	0.0825287	0.753296	0.134535	0.679516	0.0510577	33	40	31	22	41	36	23	0.475	0.0555556	0.111111	0.416667	0.678073	0.000424934	0.54945	0.0179096	0.846437	0.334974	0.00920285	0.833095	0.652449	1	0.965695	1	0.917996	0.661258	0.419401	0.667658
5	2	0	0	1	1	6	0.832724	0.433469	1	0	0	0	0.0324889	1	0	0	0.387485	0.368546	0.663177	0.227251	0.559046	0.598073	33	40	31	22	41	36	23	0.475	0.0555556	0.111111	0.416667	0.642098	0.0799534	1	0.181504	0.921828	0.483532	0.00287011	0.838923	0.682742	0.264466	1	0.218478	0.899517	0.742079	0.412122	0.72783
5	2	0	1	0	0	1	0.64834	0.67609	0.794159	1	1	1	0.829797	0.227329	0.67471	0.74213	1	0.274028	1	1	0.692026	0.173719	33	40	31	22	41	36	23	0.475	0.0555556	0.111111	0.416667	0.183356	1	8.26565e-16	1	0.614247	0.0744857	4.92691e-15	2.20185e-15	0.047649	0.989758	8.96711e-16	0.820473	0.134077	0.212081	0.0737118	0.0224636
5	2	0	1	0	1	3	0.766059	0.611395	0.744747	0.49347	0.456527	0.551673	1	0.843241	0.205073	0.291576	0.745862	0	0	0.280278	0	0.379489	33	40	31	22	41	36	23	0.475	0.0555556	0.111111	0.416667	0.152605	0.981832	0.219689	0.987499	0.432474	1.57618e-15	0.0961672	0.0519988	7.81824e-18	0.936048	0.0458555	0.801863	9.51156e-18	3.05317e-15	2.41486e-14	9.98854e-15
5	2	0	1	1	0	5	0.950887	0.430771	0.531932	0.484241	0.685817	0.955821	0	0	1	1	0.265768	1	0.666884	0.499689	0.475963	0.22403	33	40	31	22	41	36	23	0.475	0.0555556	0.111111	0.416667	0.26724	0.857065	0.31394	0.845639	0.435472	0.219806	1	1	0.152141	0.610221	0.0727609	0.535455	0.152268	0.197244	1	1
5	2	0	1	1	1	7	0.277239	0	0.185645	0.846655	0.858221	0.782263	0.818624	0.601501	0.692092	0.684657	0.80329	0.408055	0.867814	0.991162	0.217391	0.514532	33	40	31	22	41	36	23	0.475	0.0555556	0.111111	0.416667	1.34281e-17	0.942695	0.762042	0.961461	1.04723e-16	0.0600788	0.161133	0.853511	0.0563673	0.89351	0.57523	0.79725	0.139306	0.132204	0.169973	0.571007
5	3	1	0	0	0	6	0.344273	0.683753	0.808538	1	1	0	0.179122	0.507494	0.0448073	0.111248	0.507914	0.575293	0.781385	0.467535	0.463979	0.0785429	33	40	31	22	41	36	23	0.35	0.138889	0.0277778	0.305556	1	0.187876	0.642176	0.227317	0.967525	1	0.339982	0.382292	1	2.77936e-16	0.369727	6.86204e-17	1	1	0.354048	0.389303
5	3	1	0	0	1	8	0.0318316	0.653972	0.465654	0.382152	0.278545	0.120819	0.16384	1	0.120706	0.238768	0.825926	0.449709	1	0.120584	0.902639	0.972887	33	40	31	22	41	36	23	0.35	0.138889	0.0277778	0.305556	0.515772	0.0669548	0.85045	0.0746709	0.743904	0.603319	0.289516	0.212148	0.689129	0.936477	0.826355	0.908751	0.896169	0.802468	0.222038	0.213832
5	3	1	0	1	0	2	1	1	1	0.243409	0.21479	0.279361	0.37355	0.670701	0.11906	0.103259	0.210067	0.193964	0.561044	0.135975	0.651532	9.40179e-23	33	40	31	22	41	36	23	0.35	0.138889	0.0277778	0.305556	0.774911	0.15793	0.212242	0.193244	1	0.890409	1	1	0.823502	0.776604	0.334686	0.705911	0.90797	0.824653	1	1
5	3	1	0	1	1	4	0.148814	0.392373	0.204889	0	0	0.0526938	0	0.948626	0	0	0.580201	0.600098	0.551084	0	0.528452	1	33	40	31	22	41	36	23	0.35	0.138889	0.0277778	0.305556	0.412778	1.31694e-16	1	5.1288e-17	0.867922	0.498302	0.0222557	0.542676	0.550329	1	1	1	0.772312	0.576964	0.108875	0.422749
5	3	1	1	0	0	3	0	0.261571	0.846761	0.367442	0.21985	0.23628	0.141626	0.133831	0.391366	0.527732	0.942556	0	0.523457	0.354583	0.26869	0.219844	33	40	31	22	41	36	23	0.35	0.138889	0.0277778	0.305556	0.37587	1	0.706257	0.956833	0.557919	0.131899	0.0633396	0.0796918	0.0859103	0.684428	0.077724	0.485567	0.0602882	0.113639	0.0330191	0.0313568
5	3	1	1	0	1	7	0.662512	0.481191	0.953126	0.114988	0.201384	0.0834947	0.26392	0.694488	0.0293069	0.0281539	0	1	0	1	0	0.359757	33	40	31	22	41	36	23	0.35	0.138889	0.0277778	0.305556	0.0926225	0.781048	0.2922	0.673471	0.355406	0.0261908	0.0228287	1.45007e-15	8.17931e-18	0.189074	0.0620748	0.0505036	0.00785261	2.88762e-15	0.0289264	6.23892e-15
5	3	1	1	1	0	1	0.408014	0	0	0.598536	0.411889	1	1	0	1	1	0.82863	0.0387367	0.163299	0.848946	1	0.0775223	33	40	31	22	41	36	23	0.35	0.138889	0.0277778	0.305556	1.06173e-17	0.992473	1.44924e-15	1	0.604409	0.0819028	1.62622e-15	0.503731	0.0134798	0.683048	4.9639e-16	0.551629	9.98986e-18	0.00969205	9.06571e-15	0.254464
5	3	1	1	1	1	6	0.701958	0.478745	0.739951	0.478475	0.408926	0.0703167	0.192871	0.288848	0.0481376	0.056584	1	0.554424	0.131938	0.819322	0.516419	0.405944	33	40	31	22	41	36	23	0.35	0.138889	0.0277778	0.305556	0.184276	0.796527	0.204913	0.751507	6.06137e-17	1.66668e-15	0.063278	0.564349	0.0402152	0.227319	0.0904274	0.154264	0.0627396	0.0465859	0.0121439	0.291526
5	4	1	0	0	0	8	0	1	0.293414	0.26038	0.234753	0.0169691	0.554231	1	0	0.0525688	0.154641	0	0.635065	0.490999	0.0681998	7.75386e-23	33	40	31	22	41	36	17	0.45	0.361111	0.583333	0.361111	0.773476	0.106274	0.00585885	0.13903	0.337498	1	0.044595	1.30792e-15	1	3.76418e-16	0.286505	9.25283e-17	1	1	0.327653	0.0439404
5	4	1	0	0	1	5	0.738849	0.28092	0.643976	0	0	0	0.958753	0.640505	0.0232343	0	0.407088	0.314009	1	0.130091	0.484393	1	33	40	31	22	41	36	17	0.45	0.361111	0.583333	0.361111	0.501026	1.31607e-16	0.233447	5.41967e-17	0.275009	0.336295	2.58485e-15	0.0948586	0.650657	0.8769	0.648401	0.864625	0.832256	0.775209	0.000223816	4.05572e-15
5	4	1	0	1	0	4	1	0.251077	0.470091	1	1	1	1	0	0.510132	0.504585	0	0.296812	0.587104	0.531108	0.311262	0.113934	33	40	31	22	41	36	17	0.45	0.361111	0.583333	0.361111	0.479617	0.146928	0.185306	0.212422	1	0.116358	0.0319962	0.512928	0.738818	0.220644	0.121963	0.112415	0.911575	0.786974	0.231331	0.215259
5	4	1	0	1	1	2	0.261112	0.190093	1	0.779684	0.725279	0.535439	0.506736	0.774882	0.363985	0.280288	0.270384	1	0.963454	0.23589	0.173579	0.51217	33	40	31	22	41	36	17	0.45	0.361111	0.583333	0.361111	0.0775655	0.0981193	1	0.0564774	0.465054	0.653232	1	0.691026	0.507042	1	1	1	0.698177	0.626322	0.881626	0.336157
5	4	1	1	0	0	8	0.680254	0.555507	0	0.622406	0.441361	0.834187	0	0.413925	0.817803	0.950799	0.900674	0.537992	0.121995	0.411773	0.189281	0.141234	33	40	31	22	41	36	17	0.45	0.361111	0.583333	0.361111	0.338339	0.957967	6.13533e-16	0.965491	8.39266e-17	3.23415e-15	0.170181	0.0513118	7.40363e-05	0.848098	3.59098e-16	0.538295	0.103413	0.10437	0.206346	0.00353458
5	4	1	1	0	1	1	0.764958	0.390632	0.457616	0.0703962	0.102134	0.618999	0.442471	0.511051	0.343081	0.387814	0.3888	0.365163	0.001174	1	0.11186	0.556196	33	40	31	22	41	36	17	0.45	0.361111	0.583333	0.361111	1.87675e-17	0.788438	0.1623	0.815096	0.898886	0.177216	0.0390206	0.141997	1.33897e-17	0.232116	0.402582	0.1967	1.05293e-17	5.08943e-15	2.29341e-14	0.0180114
5	4	1	1	1	0	7	0.426796	0.683813	0.446998	0.338486	0.324976	0.419714	0.871524	0.792741	0.684161	0.625717	1	0.178648	0	0	1	0.273078	33	40	31	22	41	36	17	0.45	0.361111	0.583333	0.361111	1	0.891974	0.234179	0.86818	0.542223	0.503568	0.69605	1	0.435898	0.618529	0.119722	0.348803	0.208175	0.541043	1	1
5	4	1	1	1	1	4	0.387422	0	0.318479	0.792871	0.387029	0.627186	0.349521	0.6221	1	1	0.913651	0.709147	0.625417	0.138818	0	0.616622	33	40	31	22	41	36	17	0.45	0.361111	0.583333	0.361111	0.384851	1	0.106977	1	0.510118	0.137002	0.318748	0.781946	0.12081	0.964231	0.13969	0.619041	0.116114	0.168784	0.496268	0.599981
6	2	0	0	0	0	7	0.728063	1	0.416463	0.225678	0.284294	1	0.973746	0.137631	0.283769	0.330204	0	1	0.547025	0.309707	0.638451	0.257162	30	40	34	37	44	30	15	0.775	0.222222	0.472222	0.472222	0.524772	0.0416214	1	0.10108	0.460907	0.578614	0.0375472	0.193777	1	1	0.512424	0.849314	1	0.937197	0.144247	0.11697
6	2	0	0	0	1	1	0.272215	0	1	0.204108	0.272186	0.81355	0.682141	0.254359	0.496692	0.285438	0.491368	0.587354	0.660292	0.326399	0.450352	0.470575	30	40	34	37	44	30	15	0.775	0.222222	0.472222	0.472222	1	0.938017	0.943156	0.867525	0.901782	0.500059	0.157187	0.0988498	0.330344	0.228586	0.455137	0.170272	0.160673	0.417691	0.258685	0.112641
6	2	0	0	1	0	6	0.816574	0.738453	0	0	0	0	0.44915	0.861224	0	0	0.00277495	0	0.927564	0	1	2.04256e-22	30	40	34	37	44	30	15	0.775	0.222222	0.472222	0.472222	0.339575	0.90037	0.408569	0.84416	0.783334	0.162284	0.212152	0.291643	2.48673e-17	4.68445e-16	0.297095	1.09212e-16	0.0297876	0.0208179	0.206706	0.148276
6	2	0	0	1	1	8	1	0.468422	0.537918	0.756562	0.911257	0.874926	0.58156	0	0.746949	0.538078	0.616015	0.612945	1	0.11364	0.449838	0.764291	30	40	34	37	44	30	15	0.775	0.222222	0.472222	0.472222	3.24867e-17	0	9.68466e-16	4.59142e-17	7.5115e-17	3.80314e-15	2.171e-15	1.02439e-15	0.511621	0.94154	0.350818	0.854905	0.716547	0.570741	1.22039e-14	4.18641e-15
6	2	0	1	0	0	5	0.364174	0.330439	0.168167	0.146942	0.166015	0.335049	1	1	0.390444	0.440068	0.709546	0.33951	0.0179329	0.510465	0.00225124	1	30	40	34	37	44	30	15	0.775	0.222222	0.472222	0.472222	0.345977	1	0.17845	0.946215	1	0.249169	0.110234	0.0460536	0.0276383	0.431703	6.9217e-16	0.340926	1.3682e-17	5.64166e-15	0.142409	0.0391381
6	2	0	1	0	1	4	0	0.375722	0.991125	0.417028	0.530325	0.273285	0	0.870323	1	1	0.830682	0.352324	0.683712	0.779815	0.084692	0.747532	30	40	34	37	44	30	15	0.775	0.222222	0.472222	0.472222	0.617963	1.29904e-16	0.361544	0.0474371	0.581462	1	0.121582	0.265487	0.955824	0.959947	0.816234	0.946019	0.940437	1	0.151677	0.17228
6	2	0	1	1	0	2	0.469801	0.704338	0.180462	0.435853	0.376311	0.512932	0.765741	0.489527	0.413594	0.278919	0.409085	0.719505	0	0.956597	0	0.869033	30	40	34	37	44	30	15	0.775	0.222222	0.472222	0.472222	0.382267	0.023856	0.590968	0.0592699	0.557328	0.339962	0.0292248	0.00773236	0.82515	0.979996	1	1	0.939805	0.847133	0.095572	0.0293088
6	2	0	1	1	1	8	0.297291	0.563586	0.137803	1	1	0.97532	0.695063	0.717764	0.751945	0.562968	1	0.609203	0.218148	1	0.0840136	0.872063	30	40	34	37	44	30	15	0.775	0.222222	0.472222	0.472222	0.668392	0.997513	0.837313	1	0.967352	0.452106	1	1	0.269987	0.344514	0.735701	0.402728	0.0605873	0.212653	1	1
6	4	0	0	0	0	1	0.534861	0.602525	0	0.431515	0.179086	0.573603	0.160219	0.925453	0.00365536	0	0	0.884897	0.743589	0.0997226	0.265809	0.142895	30	40	34	37	44	30	15	0.85	0.166667	0.5	0.444444	5.70872e-17	0	1.7908e-15	4.79842e-17	7.80394e-17	7.78847e-15	2.69586e-15	8.47e-16	0.701171	0.989309	0.85489	1	0.840137	0.713238	1.82927e-14	6.45207e-15
6	4	0	0	0	1	7	0	0.431638	1	0.221125	0.371954	0.16117	0.252259	0.704478	0.319867	0.33812	0.400116	1	0.810806	0.123296	0.41081	0.692546	30	40	34	37	44	30	15	0.85	0.166667	0.5	0.444444	1	1.26541e-16	1	0.0266239	0.346373	0.94297	0.023268	0.00105235	0.988604	0.992358	1	0.961178	0.997868	1	0.0993095	0.0382874
6	4	0	0	1	0	4	1	1	0.0903855	0	0	0	0.354706	1	0	0.0162887	0.134179	0.892323	0.975811	0	0.889079	2.89201e-22	30	40	34	37	44	30	15	0.85	0.166667	0.5	0.444444	0.0418541	0.0151755	0.132761	0.0094412	0.0715987	0.489496	0.0193737	0.000687489	0.732865	1	0.481581	0.912164	0.894876	0.817148	0.0840084	0.0182206
6	4	0	0	1	1	3	0.31553	0.554878	0.857935	1	1	0.163747	0	0.613347	0.325911	0.322876	0.3575	0.471302	1	0.00549568	1	0.489453	30	40	34	37	44	30	15	0.85	0.166667	0.5	0.444444	0.964992	0.988498	0.142521	0.981214	0.770468	1	0.335344	0.072708	0.282863	0.0757403	0.422413	0.145078	0.166289	0.402197	0.458706	0.148263
6	4	0	1	0	0	6	0.331743	0	0.78913	0.794915	0.770969	0.224881	1	0	0.387541	0.572911	0.47664	0.691801	0.421317	0.304314	0.0184649	0.213018	30	40	34	37	44	30	15	0.85	0.166667	0.5	0.444444	0.684018	0.984752	0.134213	0.960545	1	0.682707	0.0752572	0.0201593	0.119963	7.22604e-16	9.74943e-16	1.60877e-16	0.0569589	0.121275	0.140319	0.0400871
6	4	0	1	0	1	5	0.0982105	0.151713	0.93394	0.102682	0.0953828	0.684862	0.82329	0.665578	0.473645	0.463274	0.995692	0.373524	0.0171623	0.786538	0.0248599	1	30	40	34	37	44	30	15	0.85	0.166667	0.5	0.444444	0.480909	0.987433	0.344269	0.978453	0.686394	0.448836	1	1	2.39132e-17	0.0606106	0.192747	0.105713	1.33495e-17	0.0511564	1	1
6	4	0	1	1	0	2	0.514789	0.128167	0.549	0.482633	0.522578	0.44863	0.474236	0.350687	0.470447	0.74993	0.76612	0	0	0.568768	0.0181976	0.241976	30	40	34	37	44	30	15	0.85	0.166667	0.5	0.444444	0.851968	0	0.268948	0.00721134	0.159835	0.594582	0.0213706	0.00128619	1	0.989309	0.385101	0.851489	1	0.915388	0.109984	0.0404506
6	4	0	1	1	1	8	0.308238	0.350717	0.715113	0.385937	0.0715763	1	0.688628	0.672661	1	1	1	0.365851	0.249072	1	0	0.811083	30	40	34	37	44	30	15	0.85	0.166667	0.5	0.444444	0.13313	1	0.763722	1	0.476956	0.342759	0.192781	0.0575915	0.0240335	0.211315	0.500009	0.223896	0.0432394	6.01021e-15	0.1645	0.0614337
6	1	1	0	0	0	4	0	0.361507	1	0.0786503	0	0.660341	0	0.810838	0.232125	0	0.123038	0.277591	0.336701	0.179472	0.0214428	0.0625921	30	40	34	37	44	30	15	0.675	0.166667	0.444444	0.388889	0.0362493	0.921397	0.70137	0.914674	0.47027	5.73021e-15	0.874606	0.821107	1.82351e-17	0.0239116	0.317869	0.0228253	1.31786e-17	4.98565e-15	0.843564	0.782071
6	1	1	0	0	1	1	0.142606	0.250367	0.658816	0.565282	0.882745	0.912114	0.442456	1	0.798637	0.628673	0.502782	0.35206	0.437174	0.195605	0.213763	0.349219	30	40	34	37	44	30	15	0.675	0.166667	0.444444	0.388889	1.91677e-17	0.037414	0.734422	0.0607501	1.0706e-16	0.303776	0.946376	0.99596	0.51956	1	0.335726	0.842568	0.8077	0.689454	0.83169	0.863581
6	1	1	0	1	0	3	1	0.413325	0	0.245308	0.658295	0	0.473965	0.415107	0	0.102883	0.352298	0.00270219	0.850942	0	1	0.27457	30	40	34	37	44	30	15	0.675	0.166667	0.444444	0.388889	0.186492	1	0.885336	1	0.855154	0.0952051	0.228825	0.259238	0.0385854	0.391112	0.378795	0.250912	0.0272133	0.0917878	0.308643	0.266897
6	1	1	0	1	1	2	0.488903	1	0.66157	0.362289	0.732611	0.873976	0.623262	0	0.410845	0.491698	0.518334	0.364452	1	0.0413101	0.753597	0.83299	30	40	34	37	44	30	15	0.675	0.166667	0.444444	0.388889	0.0630721	0.910393	1	0.910007	0.688146	0.124825	1	1	0.03547	5.01183e-16	0.514608	1.15323e-16	0.0265646	0.0297614	1	1
6	1	1	1	0	0	6	0.345717	0	0.901083	0.682214	1	1	0.511434	0.5457	0.331621	0.440356	0.561869	0.307805	0.137293	0.0276937	0.177944	0.3703	30	40	34	37	44	30	15	0.675	0.166667	0.444444	0.388889	0.0368849	0.0222539	1.28962e-15	0.0175286	0.14571	0.0870465	3.10898e-15	3.58819e-15	0.452009	0.987819	6.66414e-16	0.770026	0.740441	0.559897	2.81598e-14	2.77844e-14
6	1	1	1	0	1	7	0.543689	0.2587	0.331056	1	0.977353	0.633921	0.644169	0.21485	0.868436	0.511917	1	0.350228	0	0.526941	0.0361367	0.892299	30	40	34	37	44	30	15	0.675	0.166667	0.444444	0.388889	0.194576	0.970726	0.274625	0.96995	1	0.313966	0.176446	0.187674	0.0790088	0.255659	0.0968993	0.194962	0.043517	0.116197	0.316936	0.293011
6	1	1	1	1	0	5	0.141305	0.171862	0.840104	0.031903	0.342817	0.615735	1	0.992299	0.642119	0.822503	0	1	0.0840811	0.365131	0	1.90568e-22	30	40	34	37	44	30	15	0.675	0.166667	0.444444	0.388889	0.377471	1.26839e-16	0.218889	0.00433776	0.605239	0.731806	0.0179447	0.00385439	0.842887	0.975947	1	1	0.961064	0.809707	0.220628	0.257513
6	1	1	1	1	1	1	0.00934717	0.697515	0.972247	0	0.304828	0.784928	0.633486	0.980066	1	1	0.75965	0	0.11941	1	0.0292189	1	30	40	34	37	44	30	15	0.675	0.166667	0.444444	0.388889	1	0.0193909	0.172971	4.87046e-17	0.462381	1	0.0342179	0.0454118	1	0.985895	0.575856	0.925937	1	1	0.271749	0.333763
6	3	1	0	0	0	2	0	0.294865	0.334273	0.997895	0.927221	0.246055	0	0.336055	0.101787	0.288496	0.358186	0	0.63258	0.54519	0.321147	2.94718e-22	30	40	34	37	44	30	15	0.725	0.0833333	0.444444	0.333333	0.072801	0.962381	1	0.927594	1.08932e-16	0.0710761	1	1	0.0625615	0.12437	0.319375	0.00545976	0.0978308	0.100826	1	0.770257
6	3	1	0	0	1	8	0.611797	0	1	0	0	0.670682	0.811473	0.502508	0.49148	0.360015	0.55637	0.0598193	0.693938	0.667689	0.106148	0.691566	30	40	34	37	44	30	15	0.725	0.0833333	0.444444	0.333333	0.89189	1.4186e-16	0.657428	5.69388e-17	0.576255	1	0.0567799	0.0329933	1	0.988079	0.855147	0.977372	0.988237	0.988891	0.3419	0.545131
6	3	1	0	1	0	5	0.644719	0.649306	0	1	0.972548	0	0.176249	0.562375	0	0	0	0.674712	0.857005	0.0783535	0.301596	0.273892	30	40	34	37	44	30	15	0.725	0.0833333	0.444444	0.333333	0.193714	0.00443592	0.682699	0.00276325	0.486067	0.00850004	3.44949e-15	4.0418e-15	0.413666	0.980863	0.991524	1	0.633638	0.509422	3.89131e-14	3.5463e-14
6	3	1	0	1	1	6	1	1	0.893639	0.208864	0.174999	0.185046	0.448991	0.902903	0.144224	0.133914	0.269818	0.166981	1	0	1	0.632213	30	40	34	37	44	30	15	0.725	0.0833333	0.444444	0.333333	0.24784	1	0.870079	1	0.626199	0.166994	0.238737	0.239204	0.0719675	0.194888	0.549602	0.157654	0.0860987	0.149279	0.358383	0.251598
6	3	1	1	0	0	4	0.313597	0.968741	0.423142	0.848519	0.795228	0.354231	0.282329	0.469963	0.206288	0.371644	0.6956	1	0	1	0.247643	0.143799	30	40	34	37	44	30	15	0.725	0.0833333	0.444444	0.333333	3.08101e-17	0.974286	0.37769	0.968801	0.493543	3.30591e-15	0.288934	0.282408	1.70868e-17	0.18378	1.4948e-15	0.0994219	1.21218e-17	4.50582e-15	0.22707	0.13297
6	3	1	1	0	1	3	0.638549	0.758519	0.741589	0.977513	1	0.691804	1	0	0.866578	0.918878	0.744248	0.264221	0.128749	0.551842	0.132515	1	30	40	34	37	44	30	15	0.725	0.0833333	0.444444	0.333333	0.183631	0.0349946	0.636436	0.0396995	0.200012	0.487804	0.8865	0.970813	0.576281	1	0.382826	0.943013	0.776527	0.733814	0.776919	1
6	3	1	1	1	0	7	0.279201	0.475285	0.354005	0.524827	0.554232	0.37766	0.248347	0.964993	0.382374	0.498674	0.591922	0.623956	0.0109127	0.53189	0.108779	0.284638	30	40	34	37	44	30	15	0.725	0.0833333	0.444444	0.333333	1	0.0108826	0.977688	0.0119555	0.558576	0.885641	0.0746684	0.261439	0.910894	0.991074	1	0.990952	1	1	0.401746	0.615337
6	3	1	1	1	1	7	0.535177	0.502368	0.93993	0.898702	0.443995	1	0.50544	1	1	1	1	0.062622	0.271597	0.938548	0	0.906146	30	40	34	37	44	30	15	0.725	0.0833333	0.444444	0.333333	0.0663857	0.920139	1.9875e-15	0.912084	1	0.0100694	0.195928	0.168774	0.00273724	3.84357e-16	0.459441	1.04239e-16	0.00382202	0.0357001	0.234639	0.0846967
7	2	0	0	0	0	7	0.843368	1	0	0.764437	0.836637	0.42001	0.320312	0.386463	0.178061	0	0	0.981524	0.994256	0.142153	0.48296	0.364533	39	39	36	37	38	32	20	0.775	0.305556	0.666667	0.5	0.193714	0.00443592	0.682699	0.00276325	0.486067	0.00850004	3.44949e-15	4.0418e-15	0.413666	0.980863	0.991524	1	0.633638	0.509422	3.89131e-14	3.5463e-14
7	2	0	0	0	1	5	0	0	1	0.324971	0.330186	0.0168606	0.459445	0.810811	0.342961	0.016789	0.877236	0.418329	0.973049	0.127955	0.736409	0.594165	39	39	36	37	38	32	20	0.775	0.305556	0.666667	0.5	1	0.0108826	0.977688	0.0119555	0.558576	0.885641	0.0746684	0.261439	0.910894	0.991074	1	0.990952	1	1	0.401746	0.615337
7	2	0	0	1	0	1	0.553911	0.729351	0.32375	0.489896	0.479372	0	0.327417	0	0	0.0995463	0.278592	1	0.68667	0.142583	0.866893	0.294526	39	39	36	37	38	32	20	0.775	0.305556	0.666667	0.5	0.89189	1.4186e-16	0.657428	5.69388e-17	0.576255	1	0.0567799	0.0329933	1	0.988079	0.855147	0.977372	0.988237	0.988891	0.3419	0.545131
7	2	0	0	1	1	2	0.578255	0.587091	0.840096	0	0	1	0.451349	0.493249	0.616226	0.3659	0.182041	0.339562	1	0.031284	0.464725	1	39	39	36	37	38	32	20	0.775	0.305556	0.666667	0.5	0.24784	1	0.870079	1	0.626199	0.166994	0.238737	0.239204	0.0719675	0.194888	0.549602	0.157654	0.0860987	0.149279	0.358383	0.251598
7	2	0	1	0	0	8	0.393667	0.322867	0.368804	0.373734	0.257705	0.451759	0.0553825	0.525863	0.362436	1	1	0.228459	0.613445	0.152104	1	3.54822e-22	39	39	36	37	38	32	20	0.775	0.305556	0.666667	0.5	0.0663857	0.920139	1.9875e-15	0.912084	1	0.0100694	0.195928	0.168774	0.00273724	3.84357e-16	0.459441	1.04239e-16	0.00382202	0.0357001	0.234639	0.0846967
7	2	0	1	0	1	5	0.514304	0.603446	0.953794	0.0367859	0.0251652	0.518864	1	1	0.592922	0.178495	0.808892	0	0.349219	0.280517	0.765576	0.293018	39	39	36	37	38	32	20	0.775	0.305556	0.666667	0.5	3.08101e-17	0.974286	0.37769	0.968801	0.493543	3.30591e-15	0.288934	0.282408	1.70868e-17	0.18378	1.4948e-15	0.0994219	1.21218e-17	4.50582e-15	0.22707	0.13297
7	2	0	1	1	0	6	1	0.812467	0.199036	1	1	0.466267	0.884869	0.612151	0.560792	0.575152	0.486939	0.497954	0	0	0	0.157343	39	39	36	37	38	32	20	0.775	0.305556	0.666667	0.5	0.072801	0.962381	1	0.927594	1.08932e-16	0.0710761	1	1	0.0625615	0.12437	0.319375	0.00545976	0.0978308	0.100826	1	0.770257
7	2	0	1	1	1	4	0.479027	0.626687	0.510666	0.286952	0.225443	0.404716	0	0.458741	1	0.391166	0.847226	0.119818	0.547623	1	0.763105	0.793977	39	39	36	37	38	32	20	0.775	0.305556	0.666667	0.5	0.183631	0.0349946	0.636436	0.0396995	0.200012	0.487804	0.8865	0.970813	0.576281	1	0.382826	0.943013	0.776527	0.733814	0.776919	1
7	4	0	0	0	0	3	1	0	0.885983	0.0980585	0.0144021	0.0202494	0.700505	0.974461	0.101606	0.141374	0.158369	0.194936	0.652018	0.964667	0.15934	0.210655	39	39	36	37	38	32	20	0.925	0.0555556	0.5	0.5	0.270105	1	0.0966697	0.980286	3.93238e-17	0.172231	0.00332633	0.132385	0.0660029	1	0.0579911	1	0.132248	0.310111	0.0152076	0.17311
7	4	0	0	0	1	7	0.313682	0.836781	0	0	0	0.524396	0	0.486826	0.282966	0.316631	0.0387494	0	1	0.497622	0.0893954	1	39	39	36	37	38	32	20	0.925	0.0555556	0.5	0.5	1	0.289964	1	0.162862	1	1	1	1	0.79233	4.11864e-16	0.673897	1.2059e-16	0.756521	0.972085	1	1
7	4	0	0	1	0	7	0.113066	1	0.767296	0.830929	0.719455	0.681876	0.476369	0.828192	0.412866	0.380346	0.162198	1	0.625354	0.489655	0	7.17906e-22	39	39	36	37	38	32	20	0.925	0.0555556	0.5	0.5	0.632821	0.0272309	0.593886	0.0519271	0.41735	0.545086	0.00839034	0.000628457	1	0.121719	0.412079	0.191147	1	1	0.0952721	0.0877507
7	4	0	0	1	1	2	0	0.780651	0.721181	0.177446	0.0887782	0	0.742774	0	0	0	0.669587	0.188914	0.791737	1	0.117035	0.893521	39	39	36	37	38	32	20	0.925	0.0555556	0.5	0.5	1.68509e-17	0.930773	1.07115e-15	1	0.073018	2.17292e-15	0.00625416	0.00945802	0.00526761	0.735874	0.158229	0.928476	0.024908	3.85467e-15	4.9476e-15	0.0104505
7	4	0	1	0	0	8	0.445696	0.7991	0.0846835	1	1	1	1	0.644905	1	1	0	0.719776	0	0.468074	1	0.234642	39	39	36	37	38	32	20	0.925	0.0555556	0.5	0.5	0.2403	0.846077	0.181634	0.760388	0.266256	0.0800686	4.83899e-16	0.00438072	9.05919e-18	0.493367	2.00041e-15	0.568258	9.01427e-18	0.0702209	0.00532519	3.80143e-15
7	4	0	1	0	1	6	0.115534	0.774665	0.46946	0.223603	0.117958	0	0	0	0	0	0.119949	0.26259	0.195429	0.556847	0.0305251	0.508763	39	39	36	37	38	32	20	0.925	0.0555556	0.5	0.5	0.248309	0.0607356	0.625818	0.0469828	0.213971	0.125323	0.00458392	0.0669392	0.613774	0.239164	0.835368	0.357123	0.941216	0.849574	0.0831316	0.116273
7	4	0	1	1	0	3	0.453991	0.764035	0.211671	0.660838	0.681176	0.779455	0.601619	0.838736	0.424809	0.28113	0.165242	0.421932	0.316753	0	0.997922	0.263346	39	39	36	37	38	32	20	0.925	0.0555556	0.5	0.5	0.118072	0.902842	0.578033	0.932862	0.152283	0.0780227	0.0121317	0.044179	0.00577168	0.634293	1	0.833267	0.0573975	0.0999008	0.0193558	0.0405127
7	4	0	1	1	1	5	0.234756	0.704604	1	0.290083	0.117183	0.139099	0.938018	1	0.366914	0.329948	1	0.223231	0.35258	0.511343	0.00301434	0.605061	39	39	36	37	38	32	20	0.925	0.0555556	0.5	0.5	0.624176	1.71722e-16	0.516948	8.12347e-17	0.199767	0.339472	0.00170044	3.93321e-16	0.669459	0.0486957	0.797901	0.147728	0.872948	0.841759	0.0621453	0.0575048
7	1	1	0	0	0	4	0	0.528763	0.490864	1	1	0	0.174218	0.0456306	0.183173	0.264148	0	1	0.642517	0.627581	0.00767801	0.112147	39	39	36	37	38	32	20	0.6	0.388889	0.444444	0.638889	0.23196	0.0789151	0.554551	0.100911	0.159035	0.35103	3.92313e-14	0.966044	0.470208	0.256988	0.675616	0.324447	0.756468	0.688461	0.33497	0.831777
7	1	1	0	0	1	1	0.697369	0	0.711836	0	0	0.383251	0.933356	0.237115	0.530379	0.485178	0.786364	0.15064	1	0.392454	0.129188	1	39	39	36	37	38	32	20	0.6	0.388889	0.444444	0.638889	0.948377	0.113599	0.595856	0.171932	0.607701	0.813643	0.0822088	0.979165	0.7484	0.547364	0.712845	0.469243	0.871905	0.929553	0.603023	1
7	1	1	0	1	0	7	1	1	0	0.275751	0.262654	0.963286	0.0252003	0	0.461331	0.757565	0.58449	0.39731	0.334413	1	0.0468132	3.19536e-22	39	39	36	37	38	32	20	0.6	0.388889	0.444444	0.638889	0.770773	0.0443453	1	0.0582707	0.477879	0.941181	0.560626	0.008593	0.905081	0.119918	1	0.164871	0.981036	0.942177	1	0.490402
7	1	1	0	1	1	3	0.631948	0.214267	0.805824	0.118948	0.0982614	0.630863	0.461551	0.22349	0.528418	0.355029	0.302919	0.274746	0.593384	0.22831	0.253533	0.731155	39	39	36	37	38	32	20	0.6	0.388889	0.444444	0.638889	1	1.66273e-16	0.549245	6.91817e-17	0.477455	1	0.544759	2.49309e-15	1	3.9223e-16	0.8991	8.61837e-17	1	1	0.82933	0.469619
7	1	1	1	0	0	5	0.98691	0.625849	0.643087	0.47409	0.455257	1	0.678379	0.268545	0.836437	1	0.558384	0.300743	0.0646486	0.656398	0	0.0311331	39	39	36	37	38	32	20	0.6	0.388889	0.444444	0.638889	1.61863e-17	1	0.571053	1	7.39381e-17	4.11166e-15	0.609787	0.539782	0.0265955	1	0.954715	1	0.0833575	0.0168232	4.57076e-14	0.376084
7	1	1	1	0	1	2	0.290204	0.193264	0.681466	0.118044	0.0743468	0.827827	1	0.54828	1	0.746103	0.424695	0.112513	0	0	1	0.602793	39	39	36	37	38	32	20	0.6	0.388889	0.444444	0.638889	0.196584	0.900959	0.313882	0.717585	0.485437	0.206894	0.757852	1	0.0573273	0.618824	0.482374	0.527621	0.0789254	0.0922214	0.20902	0.899216
7	1	1	1	1	0	4	0.932982	0.401269	0.527958	0.458491	0.457957	0.543472	0.0236495	0.353247	0.963883	0.88097	0.373177	0.191183	0.320947	0.266651	0.0562382	0.0657148	39	39	36	37	38	32	20	0.6	0.388889	0.444444	0.638889	0.169904	0.955646	0.628913	0.844077	0.37319	0.267674	1	0.0774923	0.0571698	0.709583	0.663807	0.685203	0.0904489	0.172273	0.359111	0.241185
7	1	1	1	1	1	8	0.831966	0.0452642	1	0.0749852	0.0251573	0.0475663	0	1	0	0	1	0	0.185325	0.4248	0.40154	0.684797	39	39	36	37	38	32	20	0.6	0.388889	0.444444	0.638889	0.204124	0.821362	7.71875e-16	0.621199	1	0.132687	0.650368	0.045046	9.31136e-18	0.401809	7.25213e-16	0.398564	8.70496e-18	3.6693e-15	0.0605312	1.49568e-14
7	3	1	0	0	0	1	1	1	0	0.909639	0.928782	0.192112	0.27322	0.839668	0	0.223634	0.448163	0.688834	0.761701	0.522416	0	3.18782e-22	39	39	36	37	38	32	20	0.8	0.194444	0.444444	0.5	1	0.0182404	1	0.0403555	1	0.794403	0.140376	0.0944255	1	1	0.771028	1	1	1	0.745049	0.503855
7	3	1	0	0	1	6	0.212671	0.352043	0.7901	0.0104484	0.0863321	0.995698	0	0.645672	0.440688	0.613849	0.553885	0.277104	0.856839	0.578676	0.266907	1	39	39	36	37	38	32	20	0.8	0.194444	0.444444	0.5	1.06312e-17	0.925493	0.229155	0.869188	0.126823	0.0202625	1	1	8.23596e-18	0.562954	1.2745e-15	0.593489	9.78995e-18	3.06932e-15	1	1
7	3	1	0	1	0	7	0.147453	0	0.0325464	0.383419	0.449073	0.585968	0.187116	0	0.219353	0.18413	0	1	1	0.450266	0.958977	0.338004	39	39	36	37	38	32	20	0.8	0.194444	0.444444	0.5	0.0179693	0.95338	0.268297	1	0.140991	0.0546023	2.94374e-15	0.00966306	0.0172659	0.613388	1	0.739609	0.0224116	0.0768499	0.00568001	1.59762e-14
7	3	1	0	1	1	3	0.08483	0.429655	0.0830974	0.0624163	0	0	0.410774	0.486438	0.0590094	0	0.890221	0	0.88253	0	1	0.281794	39	39	36	37	38	32	20	0.8	0.194444	0.444444	0.5	0.152376	1	0.317213	0.970913	0.540373	0.128908	0.00219384	2.37028e-15	0.0544739	0.709491	0.0519302	0.711651	0.0366872	0.189864	2.87707e-14	0.016133
7	3	1	1	0	0	1	0.53627	0.828751	0.352269	0.381791	0.228234	1	0.473093	1	0.437655	0.217328	0.687288	0.364652	0.443334	0.432839	0.512921	0.369965	39	39	36	37	38	32	20	0.8	0.194444	0.444444	0.5	0.111787	0.0637584	0.842149	0.101913	7.41908e-17	0.233649	0.0378121	0.85724	0.495255	0.153393	0.939238	0.309234	0.934804	0.69945	0.304212	0.865103
7	3	1	1	0	1	5	0	0.250793	1	0	0.144642	0.693789	0.0707869	0.306261	0.633741	0.690906	0.514164	0.514229	0.559127	0.322147	0.749708	0.649208	39	39	36	37	38	32	20	0.8	0.194444	0.444444	0.5	0.0964828	0.815373	0.827959	0.679769	0.162632	0.0300874	0.0877254	0.456507	0.0306286	0.334515	0.417899	0.38251	0.0805024	0.186313	0.184487	0.485595
7	3	1	1	1	0	8	0.055647	0.333119	0.136262	1	1	0.332669	1	0.658364	0.399047	0.548004	0.52248	0.664688	0	1	0.143625	0.270767	39	39	36	37	38	32	20	0.8	0.194444	0.444444	0.5	0.751687	1.62941e-16	0.976115	7.11754e-17	0.569705	1	0.0612292	0.02143	0.937158	3.14061e-16	0.812394	7.50689e-17	0.93374	0.990032	0.506888	0.4776
7	3	1	1	1	1	2	0.865566	0.0645935	0.533937	0.264086	0.130792	0.848185	0.335234	0.711867	1	1	1	0.0903951	0.432504	0.242324	0.825084	0.771497	39	39	36	37	38	32	20	0.8	0.194444	0.444444	0.5	0.230218	0.11061	1.2446e-15	0.149977	0.0843805	1.81539e-15	0.00391827	0.796722	0.513153	0.593963	0.590673	0.706042	0.891319	0.623907	0.153108	0.642002
8	1	0	0	0	0	2	1	0	0.419563	0.120475	0.111386	0.107571	0.419541	0.489427	0.108236	0.0965309	1	0.867304	1	0	0.478314	0.90626	22	29	42	23	38	32	20	0.475	0.25	0.194444	0.416667	0.512965	0.0549111	0.44744	0.103964	0.247296	0.583384	0.0146369	1.70495e-15	0.955342	0.0770892	0.684807	0.025679	0.968822	0.85955	0.248421	0.126717
8	1	0	0	0	1	4	0.230817	0.406345	0.217395	0.46085	0.267729	0.483969	0	1	0.195459	0.166207	0.36364	0.97125	0.693176	0.110872	0.212474	0.700211	22	29	42	23	38	32	20	0.475	0.25	0.194444	0.416667	1	0.0597129	1	0.147837	9.17695e-17	0.528394	0.0306983	0.00983781	1	0.00545589	1	0.033718	1	1	0.305071	0.140592
8	1	0	0	1	0	8	0.0614595	1	0	0.0624625	0.0365301	0.582606	1	0.471948	1	0.859013	0.232056	0.918075	0.496413	0.0143638	0.23246	0.889513	22	29	42	23	38	32	20	0.475	0.25	0.194444	0.416667	0.616269	0.0434025	0.173138	0.0698022	0.284267	0.874775	0.0316731	0.647115	0.939083	0.610112	0.299986	0.57991	0.964967	0.988452	0.320756	0.494779
8	1	0	0	1	1	1	0.173158	0.534193	0.417211	0.212285	0.217178	0	0.365919	0.899609	0	0	0	0.489213	0.786217	0.171154	0.569863	1	22	29	42	23	38	32	20	0.475	0.25	0.194444	0.416667	0.0665024	1.77589e-16	0.583546	8.69844e-17	0.326862	0.802654	0.0223142	0.352193	0.699178	1	0.526521	1	0.91067	0.804372	0.225247	0.239328
8	1	0	1	0	0	6	0	0.585872	0.380211	0.641761	0.345033	0.481105	0.519132	0.962911	0.656316	1	0.423371	1	0.105653	0.756174	0	0.107086	22	29	42	23	38	32	20	0.475	0.25	0.194444	0.416667	0.560742	0.904817	0.0672786	0.819946	0.747568	0.657252	0.0258584	0.0378129	0.163599	0.165832	8.40575e-16	0.168664	0.0702395	0.254483	0.0831059	0.0727957
8	1	0	1	0	1	7	0.149042	0.336068	0.437523	0.337911	0.358209	1	0.649633	0.215482	0.671066	0.806646	0.271422	0.59851	0.220289	0.602148	0.0897327	0.069741	22	29	42	23	38	32	20	0.475	0.25	0.194444	0.416667	0.0188268	1	0.00346576	1	0.0301269	6.37178e-15	0.00592757	0.014404	0.0272573	0.720113	0.0398808	0.699573	0.0631081	4.30183e-15	0.00227414	0.0126669
8	1	0	1	1	0	3	0.667474	0.0225229	1	0	0	0.287575	0.567987	0.871174	0.244779	0.281474	0.992619	0.286484	0.169129	1	0.427612	0.0111174	22	29	42	23	38	32	20	0.475	0.25	0.194444	0.416667	1.68638e-17	0.915469	0.0866986	0.839815	0.0228578	0.0289632	2.44768e-15	0.015513	1.28489e-17	0.386478	0.0598493	0.38369	0.0866049	0.0295196	1.98948e-14	8.4477e-15
8	1	0	1	1	1	1	0.440107	0.130818	0.515904	1	1	0.646922	0.239751	0	0.506694	0.478796	0.744483	0	0	0.361644	1	7.63885e-23	22	29	42	23	38	32	20	0.475	0.25	0.194444	0.416667	0.317244	0.843997	9.58115e-16	0.70868	1	1	1	1	0.087314	6.18196e-16	0.173298	1.52054e-16	9.5626e-18	0.0228068	1	1
8	2	0	0	0	0	5	0.142203	0.728852	0.446072	0.329569	0.476701	0.359305	0.425143	0.453683	0.089017	0.064	0	0.111306	0.928406	0	0.65101	0.306821	22	29	42	23	38	32	20	0.475	0.25	0.194444	0.472222	0.879268	0.150562	0.0816441	0.189871	9.70669e-17	1	1	0.929001	0.761294	0.812437	0.29194	0.841797	0.842794	0.953413	1	0.736583
8	2	0	0	0	1	8	0.360558	0.682194	0.287566	0.74932	0.936894	0.212874	0.533993	0.850296	0.0794212	0.0520838	0.898354	1	0.921776	0.132005	0.570159	0.394194	22	29	42	23	38	32	20	0.475	0.25	0.194444	0.472222	0.186462	0.0464252	0.401128	6.2463e-17	0.0338507	0.224281	0.00844332	2.57492e-15	0.619084	1	0.550448	0.999461	0.845246	0.777531	0.172413	0.168758
8	2	0	0	1	0	2	0	1	0	1	0.670283	0.759746	0.961098	0.181055	0.239567	0.155803	0.443418	0.0952111	0.789587	0.370171	0.0720962	0.194186	22	29	42	23	38	32	20	0.475	0.25	0.194444	0.472222	0.367865	0.235111	0.36852	0.361715	0.222632	0.658256	0.741876	0.980163	0.732111	0.569538	0.551963	0.623945	0.9218	0.931973	0.80217	1
8	2	0	0	1	1	4	1	0	1	0.27274	0.478905	0	0.728269	1	0	0	0.818997	0	1	0.159703	0.118141	1	22	29	42	23	38	32	20	0.475	0.25	0.194444	0.472222	1	1.40656e-16	1	0.0409285	0.184898	0.232761	0.0543908	1	1	0.976969	1	1	1	1	0.489633	0.993492
8	2	0	1	0	0	6	0.538256	0.656796	0.221764	0.359334	0.380136	0.112071	0.765305	0.540527	0.105913	0.124914	1	0.607621	0.229184	1	1	0.208951	22	29	42	23	38	32	20	0.475	0.25	0.194444	0.472222	0.129864	0.922318	6.41059e-16	0.889821	1	0.0648857	0.0131567	0.0209725	0.012855	3.77092e-16	5.8514e-16	0.0446661	9.60119e-18	4.10093e-15	0.0518097	0.0224926
8	2	0	1	0	1	7	0.104295	0.678332	0.49727	0	0	1	0.363309	0	1	1	0.318216	0.685951	0.191352	0.932291	0	0.176064	22	29	42	23	38	32	20	0.475	0.25	0.194444	0.472222	0.376273	1	0.392399	0.998792	0.916908	0.333678	0.0206277	0.0379403	0.113212	0.217477	0.434325	0.204845	0.103806	0.313108	0.141085	0.140046
8	2	0	1	1	0	4	0.260997	0.537807	0.666299	0.687098	1	0.238818	0	0.362611	0.291035	0.260435	0.287358	0.392734	0.550249	0.765776	0.657162	3.69767e-23	22	29	42	23	38	32	20	0.475	0.25	0.194444	0.472222	1.55625e-17	0.918535	0.219994	0.841735	0.423592	2.80321e-15	2.87589e-15	0.00796357	1.22389e-17	0.0517085	0.519729	9.27784e-17	0.0989372	0.0914991	0.00143263	1.68589e-14
8	2	0	1	1	1	5	0.336848	0.546334	0.0234654	0.155	0.452972	0.331068	1	0.78527	0.235076	0.274936	0.873029	0.308836	0	0.451974	0.0456271	0.33393	22	29	42	23	38	32	20	0.475	0.25	0.194444	0.472222	0.181674	0.983321	0.333137	1	0.80202	0.256507	0.0150205	0.880003	0.000560783	0.164789	0.444445	0.174014	0.00930825	0.048096	2.78322e-14	0.590502
8	3	1	0	0	0	2	0.134323	0.901126	0.234108	0.154638	0.152981	0.0624792	0.86509	0.752835	0.00175456	0	0	1	0.464468	0.311107	0.208712	0.7035	22	29	42	23	38	32	20	0.4	0.305556	0.111111	0.555556	1	0.160229	1.05341e-15	0.263474	0.767595	1	0.13625	0.238345	1	0.29976	0.141092	0.21721	1	1	1	0.638849
8	3	1	0	0	1	1	0.570821	0.571222	0	0.259781	0.287902	0.218078	0	0.369553	0.169994	0.130683	0.378257	0.651251	0.627305	0.0236316	0.613269	0.558583	22	29	42	23	38	32	20	0.4	0.305556	0.111111	0.555556	0.209398	1.55225e-16	0.889348	6.58217e-17	7.12368e-17	0.0204367	1.36127e-14	2.38502e-15	0.4228	1	1	1	0.893262	0.652784	0.341223	0.146781
8	3	1	0	1	0	6	1	0	0.39442	0	0	1	1	0.169913	1	1	0.579189	0.63783	1	0	0.80617	1	22	29	42	23	38	32	20	0.4	0.305556	0.111111	0.555556	0.752033	0.165742	0.110947	0.229857	0.796485	0.445538	0.00302276	0.0466735	0.659565	0.0385376	0.0784409	1.08782e-16	0.927558	0.8554	0.606553	0.315784
8	3	1	0	1	1	3	0.0572309	1	0.848489	0.3043	0.228754	0.063712	0.265479	0.206362	0.0400545	0.0309439	0.124457	0.0223707	0.734666	0.104611	0.580371	0.749429	22	29	42	23	38	32	20	0.4	0.305556	0.111111	0.555556	0.646728	0.126681	1	0.191073	0.237123	0.278421	1	1	0.533047	0.633353	0.829076	0.606244	0.877545	0.706672	0.551439	1
8	3	1	1	0	0	8	0.0226677	0.987936	0.133826	1	1	0.0192804	0.444709	1	0.0895344	0.141583	0.291328	0.207633	0.0291824	1	0.0577802	0.0272475	22	29	42	23	38	32	20	0.4	0.305556	0.111111	0.555556	0.260113	0.982453	0.273494	0.917227	0.948061	0.291257	0.031961	0.023322	0.102883	0.292522	0.0394063	0.198728	0.0920315	0.221119	0.263176	0.200611
8	3	1	1	0	1	5	0.270751	0.758604	0.447903	0.485272	0.463995	0.175171	0.228835	0.397868	0	0.0277895	1	0.365321	0.360818	0.927294	1	0.0507258	22	29	42	23	38	32	20	0.4	0.305556	0.111111	0.555556	0.112697	1	0.094514	0.977263	1	2.23605e-15	0.0657342	0.0225152	0.00654581	0.35044	0.0482495	0.290407	0.0262377	0.0624533	0.0572402	1.78233e-14
8	3	1	1	1	0	7	0.381967	0.655912	0.183041	0.741138	0.676013	0.580681	0.403481	0	0.435541	0.396019	0.806851	0	0.34795	0.253147	0.174978	7.66065e-23	22	29	42	23	38	32	20	0.4	0.305556	0.111111	0.555556	0.187992	0.999218	0.0200178	1	0.93787	0.170304	0.154704	0.898226	0.05104	0.350097	9.06855e-16	0.330562	0.082593	0.14473	8.44146e-14	0.747475
8	3	1	1	1	1	2	0	0.901481	1	0.0544703	0.0728106	0	0.540255	0.792377	0.163077	0.399972	0.634316	0.138506	0	0.385998	0	0.0258541	22	29	42	23	38	32	20	0.4	0.305556	0.111111	0.555556	9.59742e-18	0.88529	0.0723525	0.859386	0.790157	0.0480146	0.61517	0.425749	7.52814e-18	4.48039e-16	0.211693	0.06161	9.86723e-18	3.3276e-15	0.299834	0.365601
8	4	1	0	0	0	1	0.518978	0.566414	0.415877	0.278406	0.376917	0.168931	1	1	0.684789	0.464607	0.827543	0.893592	0.947735	0.721104	0.382183	0.867239	22	29	42	23	38	32	20	0.4	0.194444	0.166667	0.444444	1	0.261842	0.564581	0.380432	0.675028	1	0.0419221	0.00708946	1	0.250841	0.473722	0.24963	1	1	0.268407	0.300796
8	4	1	0	0	1	6	0.0512736	1	1	0.211745	0.345651	0.1541	0.487507	0.647161	0	0	0.21997	0.488706	0.951664	0.173738	0.831791	1	22	29	42	23	38	32	20	0.4	0.194444	0.166667	0.444444	0.178636	0.243332	1	0.369967	0.570049	0.215299	0.0389751	1.86064e-15	0.574534	0.458174	1	0.392362	0.862816	0.711031	0.210492	0.160584
8	4	1	0	1	0	3	0	0.925702	0.570406	0	0	0.0156155	0.6092	0.555411	0.580877	0.172691	0	0	0.846686	0	0.638346	0.166442	22	29	42	23	38	32	20	0.4	0.194444	0.166667	0.444444	0.694367	0.263357	0.604073	0.370609	0.400038	0.776909	0.366446	0.800156	0.584039	0.207524	0.66418	0.278512	0.797525	0.826165	0.261031	0.747651
8	4	1	0	1	1	4	0.419723	0.750383	0.0248425	0.0974002	0.422296	0.434968	0	0.737492	0.0809567	0.0508634	0.630736	0.428812	0.816587	0.119188	0.921896	0.651085	22	29	42	23	38	32	20	0.4	0.194444	0.166667	0.444444	0.111945	1.34977e-16	0.586092	5.72931e-17	6.04264e-17	0.113565	1.97964e-15	0.466803	0.332904	1	0.967756	1	0.63565	0.562082	1.53522e-14	0.332793
8	4	1	1	0	0	8	0.135211	0.904571	0.246482	0.588397	1	0.761601	0.381571	0.212538	0.639941	0.60332	1	0.863583	0	1	0	0.20526	22	29	42	23	38	32	20	0.4	0.194444	0.166667	0.444444	0.406126	0.902279	1.17512e-15	0.820545	1	0.494721	0.0284426	0.0329119	0.130673	0.0812778	0.55189	9.08961e-17	0.0389635	0.296366	0.0742268	0.14178
8	4	1	1	0	1	6	1	0	0.0124964	1	0.898324	0	0.385986	0.766639	0.0445823	0.0440281	0.591034	1	0.577418	0.256234	0.653452	0.236551	22	29	42	23	38	32	20	0.4	0.194444	0.166667	0.444444	0.0117216	0.930399	0.240999	0.946516	0.707089	0.0366694	0.0186948	0.0237426	8.5728e-18	0.166062	0.300041	0.220358	0.0133631	0.0532444	0.00741779	1.21415e-14
8	4	1	1	1	0	3	0.60939	0.566022	0	0.531203	0.817763	0.0270329	0.614705	0.545357	0.0876125	0.0754235	0.685612	0.253767	0.322359	0.933274	1	9.83303e-23	22	29	42	23	38	32	20	0.4	0.194444	0.166667	0.444444	1.34162e-17	0.865468	0.091345	0.819382	0.610089	3.46576e-15	0.00664633	0.621132	0.00656933	3.83529e-16	1.26976e-15	0.0241834	9.4297e-18	3.74666e-15	0.010719	0.450338
8	4	1	1	1	1	2	0.269157	0.756058	0.816159	0.233067	0.24632	1	0.0159411	0	1	1	0.878605	0.909475	1	0.131174	0.609922	0.192162	22	29	42	23	38	32	20	0.4	0.194444	0.166667	0.444444	0.000687354	1	0.902122	1	0.587546	0.291468	1	1	0.0160247	0.385527	0.760567	0.356246	0.0445329	0.113785	1	1
9	1	0	0	0	0	5	0.538202	0.998486	0	0.663474	0.551635	0.639397	0.791712	0	0	0	0.0656941	0.297849	0.468887	0.265707	0.789556	1.44751e-22	39	36	37	26	43	38	23	0.5	0.277778	0.388889	0.25	1	0	0.225747	0.00954392	0.698206	0.625773	0.717674	0.195737	1	1	0.307121	1	1	1	0.915986	0.76092
9	1	0	0	0	1	7	0.0317885	0	1	0.0148564	0.044618	0	0	0.609774	0.0711304	0.450471	0.882634	0.399232	0.317031	0.512839	1	1	39	36	37	26	43	38	23	0.5	0.277778	0.388889	0.25	0.45389	0	0.424779	0.0179884	1	0.330205	0.526926	3.75077e-14	0.804222	1	0.125168	0.92533	0.837615	0.77096	0.531701	0.510346
9	1	0	0	1	0	2	0.218886	1	0.564016	0.273705	0.142518	0.929573	1	0.467782	0.0715063	0.101244	1	1	1	0.0935941	0.497207	0.803592	39	36	37	26	43	38	23	0.5	0.277778	0.388889	0.25	0.0268027	0	1.08845e-15	4.61217e-17	0.459529	0.136925	5.39648e-14	0.278321	0.646922	1	0.0204122	0.96331	0.703477	0.654571	9.23787e-14	0.328514
9	1	0	0	1	1	1	0.602808	0.544543	0.492597	0.222357	0.215586	0.0574782	0.761606	0.0891247	0.0494597	0.110945	0.296195	0.328598	0.281415	0.81401	0.481074	0.891431	39	36	37	26	43	38	23	0.5	0.277778	0.388889	0.25	0.289525	0	0.481154	0.0203901	0.696401	1	0.675782	0.222328	0.977149	1	0.433665	0.968603	0.877885	0.909533	1	1
9	1	0	1	0	0	6	0.507048	0.605331	0.434848	0.58306	0.571457	1	0.817969	0.822303	0.237365	0.407818	0.347616	0.230446	0	0.630504	0	0.208367	39	36	37	26	43	38	23	0.5	0.277778	0.388889	0.25	0.153941	1	0.768406	1	0.364261	3.62366e-15	0.224316	0.150323	1.82116e-17	0.645323	1.19866e-15	0.577755	1.05169e-17	4.27152e-15	0.00117386	4.49415e-14
9	1	0	1	0	1	3	0.369947	0.69982	0.445745	0.662407	0.652028	0.410965	0.988268	0.337805	0.47656	0.792894	0.258917	0.52552	0.412739	1	0.396641	0.554899	39	36	37	26	43	38	23	0.5	0.277778	0.388889	0.25	4.69464e-17	0.438126	0.604257	0.902624	8.44598e-17	0.0834541	0.593044	0.24521	0.0788009	0.336441	0.181219	0.260286	0.173494	0.23295	0.342729	0.204971
9	1	0	1	1	0	4	1	0.753272	0.159704	1	1	0.154139	0.986465	0.867933	0.164884	0.191324	0	0.240195	0.431941	0	0.594309	0.00671917	39	36	37	26	43	38	23	0.5	0.277778	0.388889	0.25	0.130825	0.0538171	1	0.84765	0.250695	0.142985	1	1	0.106042	9.24932e-16	1	1.49872e-16	0.172752	0.242792	0.359176	0.328596
9	1	0	1	1	1	8	0	0.587241	0.710066	0	0	0.80284	0.999534	1	1	1	0.483046	0	0.100675	0.950601	0.862297	0.554388	39	36	37	26	43	38	23	0.5	0.277778	0.388889	0.25	0.197953	1.9594e-15	0.875469	0.906138	0.289136	0.390357	0.544884	0.517057	0.121692	0.295549	0.37481	0.30634	0.113475	0.192567	0.40555	0.557262
9	2	0	0	0	0	6	0.828122	1	0.259885	1	1	1	0.33228	1	0.179565	0.0213538	0.245282	0.857708	1	0.164182	0.0456589	0.0609693	39	36	37	26	43	38	23	0.625	0.111111	0.416667	0.194444	0.467668	0.0222025	0.404615	5.30189e-17	0.328775	0.67493	0.0828051	0.0133439	0.798871	1	0.683861	1	1	0.883203	0.494239	0.295878
9	2	0	0	0	1	3	0.569908	0.195048	0.212615	0.255842	0.314481	0	0	0.869026	0	0	0.075123	0.244125	0.756807	0	0.320355	0.203077	39	36	37	26	43	38	23	0.625	0.111111	0.416667	0.194444	0.516644	1.29786e-16	0.638784	0.0114077	0.506865	0.709601	0.0966387	3.66853e-15	0.811336	0.985988	0.700749	0.966059	0.837331	0.619044	0.437869	0.315141
9	2	0	0	1	0	2	0.764482	0.426403	0.00988252	0.884327	0.612468	0.444987	0.0851391	0.812435	0.231973	0.644719	0	0	0.897336	0.263574	0.18261	0.033258	39	36	37	26	43	38	23	0.625	0.111111	0.416667	0.194444	0.474886	0.253956	0.919481	0.364101	0.483417	0.311009	0.091512	0.00549148	0.748354	5.26557e-16	1	1.44421e-16	0.978779	0.741976	0.46096	0.237964
9	2	0	0	1	1	7	0	0.0934651	0.916842	0	0	0.194865	1	0.967121	0.30546	0.253295	0.624355	0.24026	0.798347	0.823917	0.510892	1	39	36	37	26	43	38	23	0.625	0.111111	0.416667	0.194444	1	0.0159955	1	0.0367862	1	1	1	1	1	0.96071	0.643212	0.823355	0.955419	1	1	1
9	2	0	1	0	0	1	1	0.903765	0	0.27801	0.326366	0.560036	0.96401	0	0.230298	0.26787	0.000352251	0.222976	0.487317	0.281389	0.165102	1.19543e-22	39	36	37	26	43	38	23	0.625	0.111111	0.416667	0.194444	0.040063	1	1.08365e-15	1	0.380996	0.0717426	2.8956e-14	0.01936	0.0208343	0.483609	9.34836e-16	0.247696	1.11402e-17	0.00957512	5.66171e-14	1.57238e-14
9	2	0	1	0	1	4	0.774194	0.303281	0.307431	0.520356	0.322257	0.345464	0.496769	0.656976	0.591671	0.403565	0.742361	1	0.0320052	0.639293	0	0.294662	39	36	37	26	43	38	23	0.625	0.111111	0.416667	0.194444	2.14379e-17	0.986215	0.66981	0.941876	5.03356e-17	2.75995e-15	0.032576	0.0322929	1.26552e-17	0.589042	0.987307	0.206511	0.00506213	3.84206e-15	0.0069963	0.00217917
9	2	0	1	1	0	5	0.846881	0.551494	0.271419	0.696555	0.456107	0.729151	0.737728	0.754718	0.498956	0.405641	0.41524	0.32526	0	1	0.179242	0.0747362	39	36	37	26	43	38	23	0.625	0.111111	0.416667	0.194444	0.136398	0.971291	0.542477	0.913053	0.145286	0.111605	0.25232	0.101878	0.050945	0.39662	0.92465	0.0114284	0.0705184	0.116572	0.103196	0.0910016
9	2	0	1	1	1	8	0.158387	0	1	0.275757	0.289864	0.744158	0.136343	0.410423	1	1	1	0.388159	0.237871	0.906476	1	0.467593	39	36	37	26	43	38	23	0.625	0.111111	0.416667	0.194444	0.158416	0.995925	0.755311	0.961822	0.207972	0.145834	0.136719	0.152949	0.0707338	0.368363	0.706181	0.0524683	0.0793922	0.123155	0.0940014	0.128755
9	3	1	0	0	0	8	0.540073	0.578552	0.0329924	0.611455	0.561504	0.72309	0.00589467	0.536767	0.100677	0.177272	0.600824	1	1	0.0974407	0.0817399	1.23619e-22	39	36	37	26	43	38	23	0.175	0.444444	0.388889	0.166667	0.655009	0	5.59995e-16	5.14536e-17	0.966369	1	0.174425	0.696787	0.930268	0.989182	0.490819	1	0.885374	1	0.383439	0.681379
9	3	1	0	0	1	5	0.563251	0.10245	1	0	0	0.711981	0.3747	0.548077	0.182966	0.105583	0.432627	0	0.648871	0	1	1	39	36	37	26	43	38	23	0.175	0.444444	0.388889	0.166667	1	1.31631e-16	0.308332	0.0274641	0.54123	0.48491	0.0260864	3.2749e-15	0.832167	1	0.398405	0.976105	0.901796	0.875563	0.227842	0.230115
9	3	1	0	1	0	1	1	0.835942	0.0270031	0.600677	0.553549	0.324945	0.592215	0.940526	0	0	0.0444169	0.0946418	0.65624	0.0790515	0.275044	0.0352518	39	36	37	26	43	38	23	0.175	0.444444	0.388889	0.166667	0.504484	0	0.1028	0.00943594	1	0.801186	1	1	1	0.989182	7.49193e-16	0.881871	0.90389	0.904326	1	1
9	3	1	0	1	1	3	0.072694	0	0.738124	0.263982	0.170766	0.04056	0.868273	0.695158	0.255178	0.301751	0	0.1249	0.903015	0.0721513	0.0943987	0.331046	39	36	37	26	43	38	23	0.175	0.444444	0.388889	0.166667	0.437671	0.189787	1	0.281722	0.23528	0.263759	0.0357154	0.446332	0.927697	2.8055e-16	1	7.08906e-17	1	0.896063	0.313411	0.38268
9	3	1	1	0	0	4	0.763157	1	0	1	1	0.720651	1	0.659001	0.40547	0.87717	0.297619	0.570891	0.467926	0.428746	0.183184	0.0505507	39	36	37	26	43	38	23	0.175	0.444444	0.388889	0.166667	4.21594e-17	1	0.324963	1	0.0891341	2.63108e-15	0.0282069	0.0110355	1.6385e-17	0.747369	0.176023	0.621447	0.0150926	0.00776175	0.0263479	1.54795e-14
9	3	1	1	0	1	2	0.945486	0.334333	0.762203	0.0181027	0.0247954	0.235179	0.790945	1	0.187398	0.20306	0.385501	0.243238	0	0.695817	0.321746	0.484687	39	36	37	26	43	38	23	0.175	0.444444	0.388889	0.166667	0.0690229	0.98017	0.659198	0.962973	0.117601	0.0272147	0.0177317	0.0112999	0.0285737	0.681098	0.447338	0.556142	1.1399e-17	4.54154e-15	0.0881414	0.0390802
9	3	1	1	1	0	7	0.825753	0.910166	0.0615823	0.874169	0.853177	0	0.705808	0	0.0404616	0.0724643	0.506204	0.646075	0.496835	0.17823	0	0.0636682	39	36	37	26	43	38	23	0.175	0.444444	0.388889	0.166667	0.135032	0.954285	0.526986	0.866711	0.193422	0.0801206	0.083855	0.0768349	0.0739256	0.576479	0.731345	0.391352	0.0531581	0.0653119	2.91091e-14	0.0324619
9	3	1	1	1	1	6	0	0.570118	0.494487	0.141285	0.135812	1	0	0.827999	1	1	1	0.786414	0.487326	1	0.350534	0.299377	39	36	37	26	43	38	23	0.175	0.444444	0.388889	0.166667	0.0592232	0.769336	0.744226	0.678546	9.89506e-17	0.0587578	3.69078e-15	0.00131951	0.10092	0.139919	0.669767	0.0532576	0.0830964	0.0512081	0.0136293	0.070874
9	4	1	0	0	0	1	0.93203	0.984803	0.425799	0.26003	0.294639	0.054223	0.297349	0.296753	0.0395296	0.0874683	0.184473	0.325468	0.598497	0.173338	0.357059	2.61175e-22	39	36	37	26	43	38	23	0.3	0.333333	0.0833333	0.527778	0.897622	0	0.0964063	4.48725e-17	0.722578	0.604541	0.0324428	0.00546243	0.887936	0.980624	0.743449	1	0.953915	0.985531	0.244274	0.308603
9	4	1	0	0	1	7	1	0.642896	0.897265	0	0	0	0	0.966819	0	0	0.54766	0.587541	0.489135	0.633316	0.388789	0.881712	39	36	37	26	43	38	23	0.3	0.333333	0.0833333	0.527778	0.579674	1.18411e-16	0.344612	0.0146677	1	0.434409	0.0282195	4.10022e-15	0.773764	1	0.252595	0.907728	0.888878	0.867541	0.204496	0.214759
9	4	1	0	1	0	5	0.0829286	1	0	1	1	0.210876	0.00376294	0.163464	0.0254957	0.027138	0.744312	0.68005	1	0.23408	0.340383	0.390456	39	36	37	26	43	38	23	0.3	0.333333	0.0833333	0.527778	1	0	0.395674	0.0154421	0.912988	0.603492	0.053972	0.0296196	1	0.980624	0.500634	0.86546	1	1	0.3336	0.388366
9	4	1	0	1	1	3	0.0325759	0.848636	0.950798	0.15482	0.240625	0.305843	0.44284	1	0.217327	0.329153	0.527558	0	0.806938	0	1	1	39	36	37	26	43	38	23	0.3	0.333333	0.0833333	0.527778	5.48497e-17	0.211182	1	0.289858	1.17633e-16	7.88021e-15	3.25202e-15	0.0190289	0.577964	0.223734	1	0.288371	0.705219	0.694238	3.17081e-14	0.0327652
9	4	1	1	0	0	6	0.524353	0.917608	0.36044	0.91198	0.711664	0.433009	1	0.856206	1	0.732705	1	1	0.177824	0.593666	0.154263	0.256523	39	36	37	26	43	38	23	0.3	0.333333	0.0833333	0.527778	0.771775	0.877513	0.281211	0.808325	0.438023	0.638527	0.0769594	0.0836941	0.138487	0.205131	0.19323	0.214178	0.159083	0.38636	0.268071	0.281977
9	4	1	1	0	1	4	0.470737	0.356219	0.965992	0.0531041	0.0238454	0.364323	0.351964	0.542733	0.351084	0.516524	0.147551	0.0709373	0	0.502574	0	0.369374	39	36	37	26	43	38	23	0.3	0.333333	0.0833333	0.527778	0.0326943	0.83425	0.36368	0.791252	0.514542	0.106346	0.0348831	0.0451839	1.72778e-17	5.171e-16	0.36013	0.14121	1.15693e-17	5.50904e-15	0.0769005	3.25634e-14
9	4	1	1	1	0	8	0.571156	0.950706	0.560623	0.243595	0.187721	0.699164	0.700658	0	0.192356	0.345798	0	0.111921	0.00192122	0.43686	0.0154955	0.0388225	39	36	37	26	43	38	23	0.3	0.333333	0.0833333	0.527778	0.153568	1	8.70418e-16	1	0.99432	0.370698	0.0502692	0.0851521	0.0797089	0.88262	1.05181e-15	0.786902	0.023439	0.0324352	0.0990284	0.174568
9	4	1	1	1	1	2	0	0	1	0.131657	0.00386066	1	0.517544	0.238794	0.656665	1	0.585892	0.00422363	0.395554	1	0.400416	0.955263	39	36	37	26	43	38	23	0.3	0.333333	0.0833333	0.527778	0.355391	0.838337	0.443205	0.723321	0.224285	1	1	1	0.193551	0.031503	0.605726	1.07032e-16	0.187042	0.354039	1	1
10	1	0	0	0	0	2	1	0.942344	0.785691	0.695236	1	0.405668	0.433957	0.357596	0.121132	0.142391	0	0.564671	0.765017	1	0.0651946	6.3772e-22	47	45	49	50	47	42	15	0.85	0.0833333	0.444444	0.444444	0.930295	0.134643	0.785708	0.0907698	0.889149	0.949071	0.419743	0.363756	1	0.0807728	0.715798	0.179605	1	1	0.581477	0.463308
10	1	0	0	0	1	7	0.586043	0.637449	0.898029	0.1097	0.0906025	1	1	0.130706	0.992201	0.768438	0.850515	0	0.683233	0.870553	0	0.829155	47	45	49	50	47	42	15	0.85	0.0833333	0.444444	0.444444	1	1.90695e-16	0.470043	0.00691028	0.92435	0.924662	0.0645238	0.0159741	0.745438	0.920426	0.504852	0.995504	0.816974	0.834424	0.223516	0.256612
10	1	0	0	1	0	6	0	0	1	0	0.1341	0.515104	0.0683679	0.515158	0.566087	0.288724	0.726365	0.530119	0.974556	0.0796231	0.967428	0.605753	47	45	49	50	47	42	15	0.85	0.0833333	0.444444	0.444444	0.525144	0.0105122	0.283294	9.7709e-17	0.669397	0.25727	0.0330992	0.461469	0.344558	0.532654	0.439411	0.418466	0.758545	0.593229	0.173632	0.36044
10	1	0	0	1	1	1	0.595756	0.730166	0.539958	0.0436543	0	0.605183	0.547704	1	0.449297	0.236488	0.676584	0.405992	1	0.541417	0.185074	0.423113	47	45	49	50	47	42	15	0.85	0.0833333	0.444444	0.444444	0.691194	0.110184	1	0.0804051	1	1	1	1	0.651877	7.48461e-16	1	2.04746e-16	0.906396	0.874338	1	1
10	1	0	1	0	0	7	0.913084	1	0	1	0.957862	0.711374	0	0.219146	0	0.201398	0.426176	0.264744	0	0.701097	0.477169	0.270683	47	45	49	50	47	42	15	0.85	0.0833333	0.444444	0.444444	0.459424	1	0.0531735	1	0.890456	0.24961	2.16987e-15	0.011703	0.0790921	0.810899	0.0770754	0.82853	0.0083211	0.184094	0.0182551	0.0386928
10	1	0	1	0	1	5	0.390219	0.826226	0.4864	0.408448	0.613603	0.615569	0.519737	0.349236	1	0.68086	1	0.275194	0.24554	0.62134	1	1	47	45	49	50	47	42	15	0.85	0.0833333	0.444444	0.444444	0.0587926	0.96294	5.30151e-16	0.938163	0.444671	0.0672803	0.00541745	1.7219e-15	0.0131862	0.659091	5.90349e-16	0.672484	7.73128e-18	0.0370337	0.00180118	7.59138e-15
10	1	0	1	1	0	3	0.506852	0.825705	0.42918	0.204847	0.150859	0.737009	0.553408	0.384875	0.570801	1	0.430351	1	0.102932	0.777245	0.698501	0.800999	47	45	49	50	47	42	15	0.85	0.0833333	0.444444	0.444444	7.72943e-18	0.994269	0.129566	0.995524	7.70129e-17	1.70071e-15	0.0284576	0.75539	3.65221e-18	1	0.137577	1	0.0129474	2.80305e-15	1.10936e-14	0.44868
10	1	0	1	1	1	6	0.787139	0.850255	0.113526	0.85687	0.649597	0	0.57246	0	0.0751615	0	0.432918	0.521604	0.106297	0	0.163146	0.00297188	47	45	49	50	47	42	15	0.85	0.0833333	0.444444	0.444444	0.306894	0.910956	0.159636	0.838323	0.778608	0.304891	0.170122	0.752432	0.06464	0.444351	0.256205	0.41971	0.0157696	0.174234	0.143393	0.580565
10	3	0	0	0	0	4	0.742143	0.815286	0.403703	0.44604	0.62759	0.116622	0.350983	0.396285	0.000265559	0.227878	0.362176	0.533972	0.552608	0.645295	0.0133673	0.284065	47	45	49	50	47	42	15	0.625	0.222222	0.277778	0.638889	1	0.0970716	0.711408	0.0920943	1	1	1	1	1	6.24945e-16	0.604172	0.0136814	0.909433	1	1	1
10	3	0	0	0	1	8	0.0884768	0.449402	1	0.0406457	0	1	0.115457	1	1	0.594021	0.681201	0.770544	1	0.255941	0.0427412	0.347677	47	45	49	50	47	42	15	0.625	0.222222	0.277778	0.638889	0.997834	1.74608e-16	0.615344	0.00476681	0.313624	0.893794	0.118634	0.0956653	0.909141	0.115812	0.620769	0.0754876	1	0.963156	0.169842	0.167087
10	3	0	0	1	0	2	0	0.22011	0.320082	1	1	0.424191	0.621287	0	0.00393896	0.398461	0.0490507	1	0.599814	0.625957	0.0886381	0.418741	47	45	49	50	47	42	15	0.625	0.222222	0.277778	0.638889	0.819023	0.0410994	1	0.0789323	0.22874	0.701925	0.00961141	0.00209333	0.729794	0.267102	1	0.440332	0.959429	0.851081	0.0895014	0.0878404
10	3	0	0	1	1	8	0.693784	1	0.678595	0	0.179894	0	0.0106021	0.526315	0.0880966	0	0.890875	0.160468	0.67627	1	0.210214	4.83718e-22	47	45	49	50	47	42	15	0.625	0.222222	0.277778	0.638889	8.69486e-18	0.99807	0.312639	0.997816	3.52077e-17	1.57642e-15	0.000550091	3.31083e-16	0.0138713	0.963279	0.270929	0.968434	0.0934623	0.028081	0.00354395	2.78433e-15
10	3	0	1	0	0	5	1	0.581788	0	0.412712	0.508593	0.333506	1	0.369615	0	0.0953795	0	0.292918	0.0570796	0.972192	0	0.432303	47	45	49	50	47	42	15	0.625	0.222222	0.277778	0.638889	0.755635	0.0125481	0.843663	8.2309e-17	0.199044	0.509397	0.0136241	0.135228	0.618549	0.723998	0.728064	0.702382	0.962926	0.802074	0.0954589	0.208968
10	3	0	1	0	1	1	0.560567	0.516864	0.349841	0.15904	0.352808	0.306181	0.926699	0.521592	0.649945	0.527451	1	0.308662	0.448722	0	0.512564	1	47	45	49	50	47	42	15	0.625	0.222222	0.277778	0.638889	0.16649	0.843122	0.256539	0.734783	0.105815	0.122702	4.05428e-16	0.00200913	0.0399178	0.296248	0.319488	0.174081	0.0985964	0.129485	0.0135928	0.0147265
10	3	0	1	1	0	4	0.614275	0.609998	0.350453	0.325364	0.232114	0.517389	0.159992	0.526407	0.89099	1	0.851713	0	0	0.360895	0.72478	0.164163	47	45	49	50	47	42	15	0.625	0.222222	0.277778	0.638889	0.0597667	1	0.284958	1	0.0236281	0.0581816	0.108895	0.0920817	0.0229287	1	0.206915	1	0.0921275	0.0778345	0.0717619	0.0839964
10	3	0	1	1	1	6	0.430791	0	0.104073	0.254072	0.531989	0.168352	0	0.456679	0.303921	0.464048	0.229392	0.843029	0.13216	0.303695	1	0.33568	47	45	49	50	47	42	15	0.625	0.222222	0.277778	0.638889	0.0707496	0.753679	4.77557e-16	0.651195	0.161302	0.0731843	0.0114852	0.11243	5.55128e-18	0.00658081	5.33062e-16	1.83794e-16	8.40923e-18	2.6794e-15	3.29643e-15	0.104007
10	2	1	0	0	0	3	0	0.855642	0.452138	1	0.580017	0.65621	0	0	0.134536	0.195153	0.557323	0.656653	0.882028	1	0.759464	0.457742	47	45	49	50	47	42	15	0.825	0.138889	0.555556	0.472222	0.639237	0.118688	1	0.207928	1.20982e-16	1	0.0395429	0.0329596	0.5828	0.207205	1	0.0407864	0.916413	0.959387	0.271508	0.121818
10	2	1	0	0	1	2	0.413269	0.394326	0.688715	0.291892	0.214408	0.9713	0.691055	1	1	0.802972	0.16696	0.439444	0.799928	0.226514	0.462753	0.654725	47	45	49	50	47	42	15	0.825	0.138889	0.555556	0.472222	0.707138	1.47807e-16	0.25666	6.58686e-17	0.190081	0.617866	2.67414e-15	0.565243	0.5893	0.7364	0.287096	0.875359	0.917928	1	0.228729	0.399475
10	2	1	0	1	0	7	0.286119	0.5276	0	0.88751	1	0.234933	0.304278	0.0514872	0.0382802	0.0104085	0.218907	0.137835	1	0.246088	0.991917	1	47	45	49	50	47	42	15	0.825	0.138889	0.555556	0.472222	1	0.0157981	0.235884	0.0291837	0.665067	0.731927	0.0158477	1.44903e-15	1	3.61913e-16	0.192389	1.14861e-16	0.954759	0.902019	0.319922	0.143891
10	2	1	0	1	1	6	0.739227	0.839126	0.911951	0.522992	0.500337	0.117882	0.208811	0.526392	0	0	0	0.431241	0.941838	0.559045	0.563123	0.19546	47	45	49	50	47	42	15	0.825	0.138889	0.555556	0.472222	0.148764	0.974699	4.27006e-16	0.98456	0.681587	0.150644	0.0445982	0.104429	0.0656902	0.929486	4.97986e-16	0.941323	0.0674756	0.262421	2.08227e-14	0.0706442
10	2	1	1	0	0	3	1	1	0.253887	0.17576	0.228477	0.238717	1	0.15099	0.292099	0.457806	0.281169	0.448345	0.341792	0	0	0.20029	47	45	49	50	47	42	15	0.825	0.138889	0.555556	0.472222	0.0238561	0.870472	0.166845	0.830292	0.913339	2.34906e-15	0.0353039	0.0207537	5.80379e-18	0.601186	0.1932	0.562819	0.0417293	0.115849	0.000257594	6.07032e-15
10	2	1	1	0	1	2	0.240652	0.669295	0.560026	0.495926	0.18019	1	0.552235	0.552134	0.782343	1	1	0	0.657779	0.460001	1	0.306567	47	45	49	50	47	42	15	0.825	0.138889	0.555556	0.472222	0.687346	0.124223	0.730332	0.149734	0.181881	0.63211	0.061837	0.553391	0.721883	0.332165	0.598877	0.219669	1	0.913609	0.339542	0.383873
10	2	1	1	1	0	8	0.618393	0	1	0	0	0	0.0571937	0.0517595	0.195591	0.176143	0.236981	0.457947	0	0.226695	0.305954	0.651934	47	45	49	50	47	42	15	0.825	0.138889	0.555556	0.472222	0.0642633	1	0.0468367	0.988057	1	0.244368	0.687428	1	0.0665997	1	0.0929769	0.975908	9.78568e-18	0.14474	0.411762	1
10	2	1	1	1	1	1	0.620492	0.525739	0.183226	0.994698	0.935608	0.299271	0.728471	0.657437	0.541076	0.428701	0.163082	1	0.177705	0.288891	0.0936137	4.93332e-22	47	45	49	50	47	42	15	0.825	0.138889	0.555556	0.472222	9.44095e-18	0.956061	0.350422	1	0.298975	0.0391407	1	0.98063	0.00616376	0.944937	0.343506	1	0.0416464	3.87225e-15	1	0.878283
10	4	1	0	0	0	5	0	0.0208412	0.616247	0.482697	0.328269	0.259129	0	0	0.0839308	0.128049	0.366781	0.593632	1	0.692218	0.0887464	0.745057	47	45	49	50	47	42	15	0.575	0.138889	0.166667	0.555556	1	0.0302443	0.440544	0.0284458	1	0.716327	0.137712	1.65786e-15	0.983337	0.23176	0.307118	0.266688	0.996607	0.934053	0.568052	0.169914
10	4	1	0	0	1	7	1	0.68566	0.069374	1	1	0.549061	0.226065	0.664958	0.0563797	0.120762	0.105104	1	0.719996	0.393904	0.215295	0.246466	47	45	49	50	47	42	15	0.575	0.138889	0.166667	0.555556	0.3808	1.54259e-16	1	7.06969e-17	0.209376	0.551733	1	0.313211	0.324358	0.970902	1	1	0.757628	0.682415	0.475226	0.0963509
10	4	1	0	1	0	4	0.0744225	0	0	0.880062	0.799167	0	0.384089	0.108563	0	0	0	0.372846	0.456193	1	0.358715	5.97823e-22	47	45	49	50	47	42	15	0.575	0.138889	0.166667	0.555556	0.891378	0.0288488	0.485272	0.00848698	0.959392	1	0.502045	0.758494	1	0.476265	0.369455	0.489254	1	1	1	0.978906
10	4	1	0	1	1	8	0.60278	1	1	0.0628704	0	0.788839	1	0.600033	0.406041	0.462737	0.235701	0.225107	0.637704	0.527063	1	0.363013	47	45	49	50	47	42	15	0.575	0.138889	0.166667	0.555556	9.02342e-18	0.0067302	0.52727	0.0113421	8.36743e-17	1.6846e-15	5.61203e-15	0.485028	0.180122	3.98126e-16	0.572764	8.70468e-17	0.649379	0.350043	2.81473e-14	0.164831
10	4	1	1	0	0	2	0.0980672	0.145981	0.258698	0.521246	0.352891	0.315825	0.518914	0.00716613	0.146945	0.121169	0.138139	0	0.235231	0.462108	0.187588	0.719814	47	45	49	50	47	42	15	0.575	0.138889	0.166667	0.555556	0.116481	0.815817	0.118345	0.698665	0.556471	0.211146	0.238024	0.0840657	0.0129128	0.423022	0.105611	0.378397	0.0902631	0.142875	0.177933	1.0718e-14
10	4	1	1	0	1	3	0.501803	0.464869	0.7788	0	0.032036	1	0.893776	1	1	1	1	0.279571	0.410435	0.513916	0.519012	1	47	45	49	50	47	42	15	0.575	0.138889	0.166667	0.555556	0.0431742	0.961037	0.48169	0.933102	0.262613	0.177257	0.293629	0.204142	5.76842e-18	0.905328	0.451851	0.771657	0.0935914	0.047748	0.196446	0.0302959
10	4	1	1	1	0	6	0.0782326	0.239181	0.160973	0.549693	0.223335	0.311186	0.31291	0.274612	0.107705	0.0723454	0.72189	0.108404	0	0.861272	0	0.82614	47	45	49	50	47	42	15	0.575	0.138889	0.166667	0.555556	0.120324	1	6.71447e-16	1	0.713053	0.224675	0.114789	1	0.00432494	0.978905	5.24876e-16	0.833293	9.20449e-18	3.98396e-15	0.0487653	1
10	4	1	1	1	1	4	0.590628	0.598133	0.167432	0.233722	0.149785	0.712105	0.902344	0.696148	0.377338	0.95951	0.451947	0.789166	0.211264	0	0.597261	0.403468	47	45	49	50	47	42	15	0.575	0.138889	0.166667	0.555556	0.0927874	0.998877	0.28818	0.995486	0.65023	0.266828	0.403875	0.765732	0.0171332	1	0.326666	0.822575	0.0961348	0.095982	0.334148	0.737006
11	1	0	0	0	0	2	0.0185505	0.364873	0.467751	0.571959	0.691578	0.430136	0.264201	0.432189	0.378914	0.221963	0.128836	0.606969	0.716553	1	0.597098	5.56774e-22	37	41	41	40	43	40	16	0.9	0.194444	0.611111	0.472222	0.866539	1.35001e-16	0.629499	0.185704	1	1	0.748709	0.110412	0.988003	1	1	1	0.965455	1	1	0.832896
11	1	0	0	0	1	8	0.0106021	0.163233	1	0	0	0.675785	0.404256	0.891363	0.835204	0.602329	0.911159	0.0557425	1	0.625694	0.77698	0.67059	37	41	41	40	43	40	16	0.9	0.194444	0.611111	0.472222	1	0	0.40461	0.0208073	0.42499	0.93603	0.677988	0.677005	1	0.485187	0.454071	0.5616	1	0.925723	0.76282	1
11	1	0	0	1	0	1	0.563414	0.513585	0	1	0.996128	0.848922	0	0	0.877111	0.546276	0.908908	0.61969	0.39818	0	0.174502	0.0252921	37	41	41	40	43	40	16	0.9	0.194444	0.611111	0.472222	0.0108424	0	8.04303e-16	4.13688e-17	0.0609373	2.77932e-15	2.54272e-14	4.52878e-15	0.456722	0.485187	0.963824	0.724969	0.725369	0.568825	5.72511e-14	0.00924506
11	1	0	0	1	1	5	0.610648	1	0.22694	0.614858	0.650854	0	0.35264	0.662772	0	0	0	0.432164	0.957277	0.294154	1	0.625896	37	41	41	40	43	40	16	0.9	0.194444	0.611111	0.472222	0.23943	0	0.0053573	0.000271177	0.14283	0.134441	0.170765	0.0284197	0.640627	0.485187	0.875204	0.699995	0.965012	0.792482	0.329179	0.194778
11	1	0	1	0	0	7	1	0	0.481727	0.463744	0.337418	1	0.506998	0.987666	0.853404	0.573593	1	1	0.580585	0.729665	0.00166657	0.425014	37	41	41	40	43	40	16	0.9	0.194444	0.611111	0.472222	2.04053e-17	0.989858	0.602569	1	0.206016	0.00493963	0.343374	0.0290635	0.0105661	0.453483	0.153772	0.393828	0.0254281	4.42348e-15	0.225658	3.28799e-14
11	1	0	1	0	1	4	0.389901	0.721981	0.955494	0.897981	1	0.669192	1	1	0.692153	0.875905	0.552771	0	0	0.346897	0.348541	1	37	41	41	40	43	40	16	0.9	0.194444	0.611111	0.472222	0.0695905	0.824423	1	0.815973	3.39109e-17	0.0426154	0.987929	0.128484	0.0250079	7.51986e-16	0.105683	1.22911e-16	0.127517	0.120272	0.368217	0.0938888
11	1	0	1	1	0	8	0.610648	1	0.22694	0.614858	0.650854	0	0.35264	0.662772	0	0	0.0377218	0.421656	0.54423	0.525176	0	0.625896	37	41	41	40	43	40	16	0.9	0.194444	0.611111	0.472222	0.0172062	0.99998	0.492312	0.991588	0.200025	0.0407715	0.683211	1	0.00258476	0.491919	0.0526082	0.370987	1.23883e-17	0.00413749	0.293141	0.476622
11	1	0	1	1	1	2	0	0.250825	0.662536	0.246234	0.311853	0.952652	0.0860495	0.673448	1	1	0.562697	0.603827	0.366529	0.857065	0.00142958	0.653863	37	41	41	40	43	40	16	0.9	0.194444	0.611111	0.472222	0.0237059	1	0.505998	0.987031	0.21553	0.0786637	1	0.222813	1.57799e-17	0.492413	4.36056e-16	0.35395	0.00286185	0.00222451	0.32448	0.0611726
11	3	0	0	0	0	3	0.788913	0.170618	0.0991542	0.798191	0.864818	0.403974	0.805976	0.124906	0.600426	0.421284	0	0.470012	1	0.126606	0.598569	6.6031e-23	37	41	41	40	43	40	16	0.85	0.138889	0.666667	0.305556	0.0334972	0	1.03631e-15	4.25217e-17	0.356842	0.176486	1.77573e-14	0.17475	0.965301	0.789433	0.177925	0.661422	0.975793	0.939105	0.6014	0.552912
11	3	0	0	0	1	6	0	0.170735	1	0.256851	0.238295	0.329734	0.0811522	0.568962	0.135163	0.052396	0.47463	0.363693	0.919718	0.00445869	1	0.826886	37	41	41	40	43	40	16	0.85	0.138889	0.666667	0.305556	0.336007	0	0.0633402	0.00261258	1	0.190734	0.391024	0.126409	0.761149	0.789433	0.600871	0.807617	0.81038	0.789019	0.253891	0.322689
11	3	0	0	1	0	4	0.441564	0.759075	0.375093	0.612074	0.562441	0	0.634084	0.605384	0	1	0.282181	0.703219	0.558917	0	0.907151	0.0496029	37	41	41	40	43	40	16	0.85	0.138889	0.666667	0.305556	5.62081e-17	0.998777	0.29263	1	0.653094	0.0343948	0.128489	0.031569	1.98605e-17	0.806496	0.0516444	0.539074	0.014392	4.88948e-15	1.52274e-13	3.98914e-14
11	3	0	0	1	1	7	0.405539	0.0647922	0.567853	0.194773	0.232535	0.137354	0	0.493553	0.0146477	0	0.287475	0	0.619752	0.298195	0.379216	0.694928	37	41	41	40	43	40	16	0.85	0.138889	0.666667	0.305556	0.409472	0.952904	0.777245	0.959491	0.402147	0.243253	0.150623	0.0626733	0.107531	0.638725	0.119217	0.44884	0.142614	0.217484	0.238723	0.267155
11	3	0	1	0	0	5	1	0.37826	0	1	1	0.309235	1	0	0.632038	0.336593	0.304906	0.218698	0.353585	0.513798	0.53216	0.283176	37	41	41	40	43	40	16	0.85	0.138889	0.666667	0.305556	0.71776	1.18595e-16	0.0706306	0.0175535	0.469473	0.579004	0.0883674	4.45313e-15	1	0.843974	1	0.959052	1	1	1	0.519425
11	3	0	1	0	1	1	0.606774	1	0.658415	0.36504	0.438559	0.486567	0.648737	0.228815	0.486387	0.505732	0.591053	0.131885	0.325511	0.785853	0.00172962	0.731445	37	41	41	40	43	40	16	0.85	0.138889	0.666667	0.305556	1	0.0648773	0.401546	0.0904533	0.829859	1	0.143362	0.631889	0.887238	1	0.84138	1	0.830058	0.913007	0.254873	1
11	3	0	1	1	0	1	0.0038021	0	0.656787	0.771601	0.85443	1	0.786097	1	1	0.515563	1	1	0.504858	0.308759	0	0.434427	37	41	41	40	43	40	16	0.85	0.138889	0.666667	0.305556	0.239988	1	0.171178	0.991886	0.796006	0.117857	1	1	0.0156289	0.805343	3.98715e-16	0.523926	1.13348e-17	0.00537461	0.163556	0.656764
11	3	0	1	1	1	6	0.719509	0.0871953	0.64756	0	0	0.241533	0.997529	0.384938	0.456065	0.168106	0.684748	0.0962836	0	1	0.562257	1	37	41	41	40	43	40	16	0.85	0.138889	0.666667	0.305556	0.0453155	0.792714	1	0.771077	6.42825e-17	5.04176e-15	0.0585159	0.0326167	0.0492706	6.71187e-16	0.209812	1.22462e-16	0.131495	0.134697	0.0203895	0.124336
11	2	1	0	0	0	5	0.516498	0.322155	0.259389	1	1	0	0.134643	0.50152	0	0.119064	0	0	0.835805	0.0319027	0.779632	1.9315e-22	37	41	41	40	43	40	16	0.95	0	0.555556	0.333333	0.134962	0.825299	1	0.790408	0.164554	0.0325999	0.13722	0.202509	0.0773183	7.08441e-16	0.15739	1.22548e-16	0.155974	0.156653	0.310955	0.229213
11	2	1	0	0	1	3	1	0	1	0.457263	0.313614	1	0.526067	1	1	1	0.711453	0.545047	0.597683	0.247966	0.558074	1	37	41	41	40	43	40	16	0.95	0	0.555556	0.333333	0.155033	1	0.259728	1	0.809842	5.59474e-15	0.121067	0.218355	2.05865e-17	0.870559	4.17488e-16	0.584151	1.20072e-17	5.41916e-15	0.122322	5.7122e-14
11	2	1	0	1	0	8	0.226616	0.751322	0	0.962067	0.829302	0.354768	0.261259	0	0.156173	0.0622799	0.313068	0.0594047	0.829755	0.00627998	0.881115	0.332718	37	41	41	40	43	40	16	0.95	0	0.555556	0.333333	0.946423	0.0790258	0.790908	0.0735363	1	1	0.242189	0.460866	1	1	0.880909	1	0.99812	0.983825	1	1
11	2	1	0	1	1	4	0.661312	0.875735	0.735568	0.123973	0.15461	0.245334	0	0.462511	0.0566482	0	0.455685	0.160175	0.872219	0	1	0.707807	37	41	41	40	43	40	16	0.95	0	0.555556	0.333333	1	0	0.279546	0.0135208	0.614333	0.43469	0.125388	0.121368	0.888379	0.858553	0.814366	0.915331	1	1	0.630753	0.602772
11	2	1	1	0	0	2	0.6803	1	0.473436	0.870903	0.506778	0.675303	0.482602	0.302939	0.924262	0.497854	1	0.879206	0	1	0.321541	0.334064	37	41	41	40	43	40	16	0.95	0	0.555556	0.333333	0.0873971	1.13797e-16	0.381438	0.0148602	0.268693	0.103774	1.01352e-14	2.02161e-14	0.743966	0.867084	0.746987	0.894981	0.855896	0.813818	0.0179136	0.346324
11	2	1	1	0	1	7	0.169619	0.517313	0.869243	0	0	0.60023	0.344911	0.0280486	0.640457	0.558128	0.381275	1	1	0.00853257	0	0.526047	37	41	41	40	43	40	16	0.95	0	0.555556	0.333333	0.369092	0	8.74701e-16	4.2323e-17	1.2964e-16	0.171519	0.00548613	0.136915	0.775351	0.858553	1	0.972974	0.897224	0.883853	9.89176e-14	0.401514
11	2	1	1	1	0	6	0	0.236745	0.570169	0.503555	0.35834	0.579608	0.282026	0.415737	0.376541	0.150527	0.50744	0.568187	0.544888	0.285106	0.600401	0.6418	37	41	41	40	43	40	16	0.95	0	0.555556	0.333333	5.39323e-17	0.843134	0.725471	0.827244	0.356447	0.0208151	0.0808733	0.112401	0.0313805	0.069951	0.0509218	0.0774122	0.113364	0.0770583	0.0458594	0.0557257
11	2	1	1	1	1	3	0.297593	0.925967	0.742382	0.321894	0.351433	0.153229	1	0.414894	0.263941	0.226391	0.692276	0.349698	0.278843	0.00781327	0.842779	0.880657	37	41	41	40	43	40	16	0.95	0	0.555556	0.333333	0.312116	0.921671	0.823251	0.907153	0.513744	0.24947	1	1	0.13048	0.555906	0.166103	0.377662	0.117634	0.163625	0.941886	0.775994
11	4	1	0	0	0	8	1	0.452143	0.0455848	0.940964	0.810781	1	0.35893	0.214217	0.427562	0.12101	0.837692	0.113535	1	0	0.183799	9.49729e-23	37	41	41	40	43	40	16	0.925	0	0.555556	0.277778	1	0	0.0454159	0.00292181	1	0.474411	0.119614	7.8059e-15	1	0.967751	0.554711	0.874005	1	1	1	0.620894
11	4	1	0	0	1	1	0.543273	0.635446	0.974619	0.595044	0.677686	0.738049	0.135021	1	0.92959	0.51279	0.318093	0.0648067	0.179005	0.413383	0	0.781104	37	41	41	40	43	40	16	0.925	0	0.555556	0.277778	0.795238	1.27755e-16	0.366129	0.015026	0.584621	1	0.103222	0.0127599	0.986427	1	1	1	0.888629	0.924738	0.961215	0.791991
11	4	1	0	1	0	2	0.0496277	1	0.74915	0.718227	0.707859	0.254927	1	0.438894	0.0173342	0.0300404	0.65989	1	0.960234	0.122094	0.228831	0.309196	37	41	41	40	43	40	16	0.925	0	0.555556	0.277778	0.439957	0	7.24044e-16	4.67904e-17	0.0551736	0.312635	0.0584981	0.688007	0.920555	0.967751	0.566137	0.878977	0.988306	0.929808	0.942221	0.902319
11	4	1	0	1	1	7	0.0421234	0.779462	0.950131	0.504571	0.488734	0.316784	0.256214	0.757815	0.0352882	0	0.215161	0	0.347429	0.0616814	0.0507399	0.604847	37	41	41	40	43	40	16	0.925	0	0.555556	0.277778	0.299389	0	0.0927512	0.00599115	1.17693e-16	0.237267	0.0652962	1	0.862966	0.967751	0.70494	0.915218	0.952342	0.861219	0.904756	1
11	4	1	1	0	0	5	0.358428	0.071986	0	1	1	0.479426	0.376542	0.0580956	0.585955	0.405318	0.151554	0.0369606	0	0.148566	0.195051	0.427362	37	41	41	40	43	40	16	0.925	0	0.555556	0.277778	0.183034	1	0.826416	1	0.391664	0.0376999	2.11949e-14	0.0306428	0.0891301	0.270022	0.0545484	0.135604	0.0951717	0.117375	0.0354885	0.086785
11	4	1	1	0	1	4	0	0.812184	0.739769	0	0	0	0.521547	0	0	0.228228	0.466841	0.0259765	0.104161	1	0.604257	0.707578	37	41	41	40	43	40	16	0.925	0	0.555556	0.277778	0.089626	0.986068	1	0.986735	0.076841	0.0129687	0.0612572	0.0154304	0.0549764	0.32391	0.132818	0.151486	0.0765637	0.0835504	1.28857e-13	0.0433667
11	4	1	1	1	0	5	0.111913	0.510216	1	0.57195	0.626539	0.160134	0.485121	0.473954	0.230158	0.180483	0	0.267132	0.499201	0.543446	1	0.726018	37	41	41	40	43	40	16	0.925	0	0.555556	0.277778	0.13746	0.967134	0.621007	0.970071	0.0925061	0.200353	0.0928778	0.0380738	0.120162	7.89434e-16	5.12568e-16	1.4056e-16	0.124226	0.151195	0.359978	0.34394
11	4	1	1	1	1	2	0.749727	0	0.894435	0.743055	0.703274	0.723306	0	0.573565	1	1	1	0.613229	0.898898	0.716549	0.184627	1	37	41	41	40	43	40	16	0.925	0	0.555556	0.277778	3.36209e-17	0.973194	0.7601	0.954806	0.582746	4.20212e-15	1	0.417185	1.67639e-17	0.140187	0.0469974	0.0247019	1.10213e-17	4.51335e-15	0.202568	4.58715e-14
12	1	0	0	0	0	7	0.880759	0.211885	0.486136	0.602301	0.60124	0.43079	0.200675	0.933605	0.980963	1	0.702603	0.289693	1	0.41557	0.0579233	0.518831	36	31	30	35	38	35	19	0.575	0.333333	0.416667	0.416667	1	0.171815	0.0952167	0.140839	1	1	1	1	0.993467	0.330779	0.0649886	0.558352	0.810831	1	1	1
12	1	0	0	0	1	6	0.75057	0.642502	0.764799	0.226339	0.191329	0.616317	0	0.289612	0.178162	0	0.134178	0.382091	0.824552	0.110655	0.879403	0.176553	36	31	30	35	38	35	19	0.575	0.333333	0.416667	0.416667	0.713054	0.00198174	0.538316	8.16569e-17	0.24842	0.66471	0.00825815	8.6087e-05	0.773964	5.13376e-16	0.536675	1.26876e-16	0.864455	0.69507	0.0913333	0.128151
12	1	0	0	1	0	3	0	1	1	0	0.0525395	0.564291	0.0966631	0	0.751872	0.334365	0.10485	0	0.822276	0.589281	0	0.61553	36	31	30	35	38	35	19	0.575	0.333333	0.416667	0.416667	0.86951	1.74254e-16	0.255968	0.00773866	0.522473	0.342474	0.0321544	0.00392365	1	0.825259	0.384127	0.963933	1	0.732433	0.221833	0.17885
12	1	0	0	1	1	8	0.958532	0.607509	0.843797	0.0781438	0	0	0.160632	1	0	0.0323556	0	0.219665	0.792851	0	0.133389	5.18074e-22	36	31	30	35	38	35	19	0.575	0.333333	0.416667	0.416667	0.359707	0.148724	0.785025	0.129547	4.01974e-17	0.417523	0.120473	0.192234	0.499559	0.704864	0.526018	0.666091	0.762133	0.564806	0.15431	0.31612
12	1	0	1	0	0	1	1	0.209694	0	0.66356	0.258686	0.33019	0.242412	0.772554	0.400884	0.267084	0.697694	0.30873	0.366789	0.141355	0.58665	0.270537	36	31	30	35	38	35	19	0.575	0.333333	0.416667	0.416667	0.0779338	0.950784	7.92742e-16	0.838936	0.120084	0.0236847	8.49399e-16	5.18198e-16	8.43212e-18	0.861988	8.2705e-16	0.733517	0.0129929	0.0225791	8.59082e-15	5.51868e-15
12	1	0	1	0	1	2	0.528306	0	0.498829	0.241872	0.166572	0.598748	0.420669	0.295147	0.399751	0.140733	0.356542	0.764352	0	0.328278	1	0.939895	36	31	30	35	38	35	19	0.575	0.333333	0.416667	0.416667	1.22242e-17	0.860261	0.339019	0.766861	0.0639477	1.64427e-15	0.021051	0.0126685	0.00369419	0.710622	0.283655	0.696387	9.01482e-18	2.8644e-15	0.012501	0.0283856
12	1	0	1	1	0	7	0.462924	0.224588	0.528133	0.3236	0.149667	1	0.432569	0.332423	0.729194	0.275333	0.863448	0.306805	0.0155446	1	0.330657	0.82737	36	31	30	35	38	35	19	0.575	0.333333	0.416667	0.416667	0.500205	1	0.509905	1	0.409659	0.456715	0.135871	0.314364	0.135501	1	0.345953	1	0.0110867	0.141234	0.166045	0.76919
12	1	0	1	1	1	5	0.396306	0.22887	0.434598	1	1	0.561531	1	0.483454	1	0.869324	1	1	0.347517	0.694985	0.446768	1	36	31	30	35	38	35	19	0.575	0.333333	0.416667	0.416667	0.140545	0.981589	1	0.967379	0.212885	0.161547	0.0186942	0.16391	0.0538106	0.939795	1	0.896244	0.0276235	0.0936359	0.0400246	0.251914
12	2	0	0	0	0	4	0.860109	0.168245	0.480914	0	0	0.854694	0	0.832439	0	0	0	0.127261	0.440225	0.523234	0.00990312	2.684e-22	36	31	30	35	38	35	19	0.575	0.416667	0.444444	0.5	0.930482	1.85249e-16	4.98662e-16	9.15241e-17	0.0900218	0.740002	0.00463871	0.0343536	0.567633	0.259445	0.0109098	0.319817	0.814951	0.902696	0.0483312	0.0755239
12	2	0	0	0	1	5	0.657196	0.0607992	0.941839	0.326643	0.289994	0.785213	0.814598	0.558201	0.0187433	0.0734634	0.651481	0.216831	0.67914	0.393866	0.0384247	0.731597	36	31	30	35	38	35	19	0.575	0.416667	0.444444	0.5	0.982572	0.313917	1	0.432621	1	1	1	0.911393	0.558384	0.736418	1	0.629319	0.737394	1	0.775963	0.524338
12	2	0	0	1	0	2	1	0	0.599481	0.173822	0.0790797	0.45461	0.453281	0.890995	0.760237	0.669399	0.074026	0	0.828821	0.568582	0	0.391103	36	31	30	35	38	35	19	0.575	0.416667	0.444444	0.5	1	0.212388	0.75301	0.273615	0.252548	0.259226	0.0157132	0.108662	1	1	0.716296	0.739719	1	0.929977	0.109233	0.166567
12	2	0	0	1	1	1	0.237872	0.510918	0.780732	0.18915	0.190667	1	0.887777	0.721356	0.0468378	0.0436617	0.630016	0.761522	1	0.327773	0.132268	1	36	31	30	35	38	35	19	0.575	0.416667	0.444444	0.5	0.666526	0.291894	0.506307	0.309457	0.912838	0.616813	0.854108	1	0.408188	0.900881	0.510281	1	0.627023	0.904489	1	1
12	2	0	1	0	0	6	0.973337	0.701155	0.0506011	0.582064	0.620787	0	0.934305	0	1	0.773296	0.851053	0.302081	0	0.184527	1	0.233979	36	31	30	35	38	35	19	0.575	0.416667	0.444444	0.5	0.414743	0.812241	0.0482594	0.707297	0.439831	0.217302	0.00327396	0.00485634	0.0584091	5.66692e-16	5.49854e-16	1.25376e-16	7.81269e-18	0.133389	0.0104603	0.0250195
12	2	0	1	0	1	7	0	1	0.280259	0.884688	0.729632	0.795696	0.421629	1	0.248642	0.541306	0.116863	0.0836914	0.320307	0.285239	0.0625975	0.327166	36	31	30	35	38	35	19	0.575	0.416667	0.444444	0.5	0.198794	0.851975	0.170701	0.776266	0.194636	1.62881e-15	3.20631e-16	2.98762e-16	1.9176e-05	0.146474	0.136828	0.183703	0.0178964	3.54617e-15	3.16882e-15	2.09155e-15
12	2	0	1	1	0	4	0.573035	0.503074	0	1	1	0.658099	1	0.781019	0.495008	0.694398	1	0.750105	0.376301	1	0.0454375	0.37407	36	31	30	35	38	35	19	0.575	0.416667	0.444444	0.5	0.409936	1	0.16602	1	0.325741	0.439622	0.1931	0.232093	0.120725	0.616864	0.180031	0.465945	0.0335338	0.375285	0.367463	0.486247
12	2	0	1	1	1	3	0.368773	0.0409941	1	0.628921	0.429875	0.644283	0.364976	0.768099	0.774059	1	0.904505	1	0.0850389	0	0.19481	0.854119	36	31	30	35	38	35	19	0.575	0.416667	0.444444	0.5	1.20826e-17	0.862802	0.72654	0.757426	3.51087e-17	0.178372	0.205022	0.225827	4.06675e-18	0.241832	0.816829	0.111286	0.0384904	0.00185305	0.351295	0.358823
12	3	1	0	0	0	8	1	0.514758	0.426951	0.00667546	0.0679537	0.0463289	0.269198	1	0	0	0.117749	0.222436	0.792224	0.0798626	0.49815	0.0231185	36	31	30	35	38	35	19	0.225	0.333333	0.194444	0.555556	1	0.177226	0.400345	0.324453	0.780985	0.610416	0.0306687	0.00923056	1	0.259691	0.638704	0.372193	1	1	0.292341	0.23012
12	3	1	0	0	1	4	0.693593	0.521601	1	0.147885	0.180005	0	0.511035	0.841611	0.823467	0.899008	0.984405	0.302093	0.932542	0.174665	1	1	36	31	30	35	38	35	19	0.225	0.333333	0.194444	0.555556	0.900412	0.0130667	0.5964	0.088994	0.708448	1	0.139144	0.131345	0.873918	1	1	1	0.769405	0.988911	0.24125	0.329054
12	3	1	0	1	0	7	0.456725	1	0.457024	0	0	0.237349	0.261343	0.874018	0.03443	0.00910565	0	0	0.670532	0.021404	0.614147	0.0366138	36	31	30	35	38	35	19	0.225	0.333333	0.194444	0.555556	0.406091	0	6.39641e-16	5.11179e-17	0.255113	0.533975	0.1878	0.562175	0.718729	0.918882	0.466878	0.929262	0.849908	0.743441	0.222285	0.446918
12	3	1	0	1	1	8	0.496455	0.729063	0.545064	1	0.791255	0.39559	0	0.744948	0.489445	0.139856	0.651912	0.358621	1	0	0.906019	0.533831	36	31	30	35	38	35	19	0.225	0.333333	0.194444	0.555556	0.550147	1.42011e-16	0.703038	0.0479995	0.163001	0.522558	0.00969544	0.152421	0.630476	0.997497	0.61617	0.942165	0.756653	0.707959	0.0162468	0.193668
12	3	1	1	0	0	3	0	0	0	0.985285	1	0.0344861	0.738018	0.68923	0.468027	0.364806	0.751181	1	0.141485	0.813553	0.223315	0.0201563	36	31	30	35	38	35	19	0.225	0.333333	0.194444	0.555556	0.062754	0.985857	0.708668	0.960794	0.405328	2.56352e-15	0.0338564	0.00891236	0.0438921	0.446721	0.295515	0.303563	0.106682	0.105113	0.110112	0.0231262
12	3	1	1	0	1	6	0.771076	0.746304	0.330006	0.221832	0.169495	0.216483	1	0.687867	0.907308	0.672775	1	0.482507	0.0984671	0.487893	0.389523	3.5958e-22	36	31	30	35	38	35	19	0.225	0.333333	0.194444	0.555556	0.0694265	0.881159	1	0.912194	0.0791924	0.0125345	3.68465e-15	2.43299e-15	0.0509523	0.0997994	0.835744	0.163517	0.111266	0.107526	0.0365966	0.017795
12	3	1	1	1	0	1	0.421353	0.315273	0.454095	0.484242	0.447104	0.248733	0.401411	0	0.970292	1	0.81946	0.318141	0.266174	0.201324	0.188824	0.719243	36	31	30	35	38	35	19	0.225	0.333333	0.194444	0.555556	0.710522	0.888315	0.66099	0.869955	1	0.722027	1	1	0.384143	4.14351e-16	0.119141	9.44644e-17	0.175934	0.459455	1	1
12	3	1	1	1	1	2	0.503242	0.749371	0.438874	0.394761	0.315297	1	0.388226	0.896652	1	0.505966	0.523578	0.423044	0	1	0	0.0746768	36	31	30	35	38	35	19	0.225	0.333333	0.194444	0.555556	1.43008e-17	1	0.408895	1	6.25966e-17	0.00742093	0.00449898	0.00462656	1.4177e-17	0.394457	7.56703e-16	0.299233	1.02415e-17	3.78768e-15	3.34917e-14	1.45076e-14
12	4	1	0	0	0	5	0.282872	1	0.417166	0.385088	0.259994	0.213184	0.461217	0.768901	0	0	0	0.468586	1	0.458892	0.101081	0.452288	36	31	30	35	38	35	19	0.35	0.555556	0.5	0.388889	1	0.219822	6.57424e-16	0.316388	1	1	0.177265	0.650133	1	0.112488	0.199932	0.120878	1	1	1	1
12	4	1	0	0	1	5	0.80926	0.843376	0.85154	0.0169925	0.0365218	0.241693	0.617192	1	0.0422841	0.0479205	0.648465	0	0.926559	0.0222484	0.779051	1	36	31	30	35	38	35	19	0.35	0.555556	0.5	0.388889	0.413335	0.0178347	0.568403	0.0161531	0.113113	0.24478	0.00679789	0.0156856	0.422293	1	0.714434	1	0.779175	0.584987	0.187482	0.238847
12	4	1	0	1	0	3	0.80926	0.843376	0.85154	0.0169925	0.0365218	0.241693	0.617192	1	0.0422841	0.0479205	0.709563	0.242116	0	0	0.000582679	0	36	31	30	35	38	35	19	0.35	0.555556	0.5	0.388889	0	0	0	0	0	0	0	0	0	0	0	0	0	0	0	0
12	4	1	0	1	1	1	0.472355	0.745969	1	0.134277	0.13595	0	0.797498	0.11446	0.426025	0.463036	0.504522	0.258524	0.926139	0.0257472	1	0.742943	36	31	30	35	38	35	19	0.35	0.555556	0.5	0.388889	0.403753	1.40205e-16	0.187947	5.20818e-17	0.229336	0.202275	0.0170239	0.00470694	0.414413	0.984984	1.01129e-15	0.938985	0.757136	0.580368	0.189407	0.241066
12	4	1	1	0	0	7	0.956842	0.337602	0.388932	0.419371	0.320709	0.350898	1	0	0.999241	1	0.731477	0.344277	0.0679755	0.863367	0	0.630802	36	31	30	35	38	35	19	0.35	0.555556	0.5	0.388889	0.0152482	0.994989	0.489158	0.960876	0.0864243	0.0440774	0.0190339	0.0236455	0.0214827	0.550754	0.360518	0.454781	0.0174973	0.0386185	0.0453568	0.0735067
12	4	1	1	0	1	2	0.994304	0.732467	0.815627	0	0	0.00514523	0.646644	0.975062	0.0462015	0.0112151	0.606551	0.0312039	0.0981988	0.774458	0.00171945	0.701823	36	31	30	35	38	35	19	0.35	0.555556	0.5	0.388889	1.33329e-17	1	0.251182	1	0.0584524	1.52671e-15	0.00508715	5.00428e-15	8.28501e-18	0.464236	0.174055	0.423318	9.45929e-18	2.95962e-15	3.43535e-14	1.78848e-14
12	4	1	1	1	0	6	1	0.547442	0.207791	1	1	0.0465112	0.583519	0.841951	0.0520525	0.235948	1	0.475975	0.558462	1	0.544021	0.621513	36	31	30	35	38	35	19	0.35	0.555556	0.5	0.388889	0.142368	0.803921	0.129494	0.762479	0.161362	0.109452	4.87369e-15	0.0427971	0.0852453	3.40216e-16	0.415055	9.4768e-17	0.14484	0.144918	0.0207169	0.134629
12	4	1	1	1	1	8	0	0	0	0.817012	0.528326	1	0	0.892604	1	0.966926	0.731986	1	0.947966	0.58588	0.467078	2.40617e-22	36	31	30	35	38	35	19	0.35	0.555556	0.5	0.388889	0.000437886	0.96894	1	0.892354	3.56813e-17	0.0653794	1	1	0.0280076	0.523499	1	0.287684	0.0625532	0.0557218	0.750741	0.523422
13	1	0	0	0	0	6	0.900812	0	1	0.383696	0.598188	0.0041702	1	0.225634	0	0.460349	1	0.386683	1	0.270591	0.203693	0.557279	33	41	39	28	34	23	13	0.725	0.583333	0.805556	0.527778	0.807134	0.0735565	0.576886	0.0925071	0.43578	0.634341	0.0354517	1.75967e-15	0.804343	3.26258e-16	0.281886	8.7734e-17	0.909913	0.958475	0.27517	0.105469
13	1	0	0	0	1	1	0	0.45083	0.561834	0.427722	0.311729	0.885252	0	0.775968	0.460202	0.446379	0.978088	0.656317	0.314703	0.424473	0	1	33	41	39	28	34	23	13	0.725	0.583333	0.805556	0.527778	0.524894	0.121643	1	0.100876	0.700395	0.635145	0.0926349	0.00880214	0.913698	1	1	1	0.985662	0.900481	0.456099	0.166963
13	1	0	0	1	0	2	0.0909601	0.865124	0	0.125731	0.0353432	0.507819	0.0605357	0.41599	0.267593	0.261806	0.393813	0.436186	0.803931	0.239547	0.236073	0.0433336	33	41	39	28	34	23	13	0.725	0.583333	0.805556	0.527778	0.813915	0.0273791	0.804688	0.0617223	0.669291	0.777303	0.155103	0.630838	1	0.335873	0.775777	0.428273	1	1	0.39629	0.465343
13	1	0	0	1	1	5	1	1	0.24032	0.0391559	0	0	0.228175	0	0.0257706	0	0	0	0.559446	0.0664266	0.651692	0.0298086	33	41	39	28	34	23	13	0.725	0.583333	0.805556	0.527778	1	1.69503e-16	0.801926	6.95017e-17	1.09107e-16	1	0.00686788	0.368567	0.694194	0.824627	0.990396	0.948421	0.771193	0.897615	0.104868	0.207959
13	1	0	1	0	0	5	0.987676	0.153071	0.514943	0	0.00935062	0.509739	0.229188	0.0697486	1	1	0.984924	0.203877	0	1	0.328907	0.109497	33	41	39	28	34	23	13	0.725	0.583333	0.805556	0.527778	0.0181148	0.794979	0.597333	0.679616	0.278921	5.99007e-15	2.61571e-15	0.0470405	1.28371e-17	0.00568455	0.491786	0.0582317	1.07009e-17	4.3374e-15	2.00445e-14	8.08434e-15
13	1	0	1	0	1	3	0.855632	0.753283	0.668992	1	1	0.724461	0.701021	1	0.585721	0.267083	0.890678	0.203039	0.40119	0.601499	0.519671	0.195679	33	41	39	28	34	23	13	0.725	0.583333	0.805556	0.527778	0.374273	1	0.299687	1	0.451178	0.687219	0.197375	0.171599	0.134867	0.462748	0.0530982	0.48779	0.0583574	0.339934	0.249363	0.178282
13	1	0	1	1	0	1	0.987884	0.89773	0.408259	0.345291	0.240919	0.392957	0.138598	0.934011	0.223855	0.106336	0.456228	1	0.0503146	0.233948	0.436416	1.24326e-22	33	41	39	28	34	23	13	0.725	0.583333	0.805556	0.527778	0.399176	0.806627	5.27061e-16	0.800498	1	0.783917	1	1	0.137435	0.0112979	7.36785e-16	0.153285	0.0143027	0.205464	1	1
13	1	0	1	1	1	7	0.412818	0.302024	0.530811	0.166168	0.205627	1	0.534732	0.904475	0.101197	0.113414	0.773361	0.0852167	0.371055	0	1	0.521902	33	41	39	28	34	23	13	0.725	0.583333	0.805556	0.527778	1.54334e-17	0.806489	0.536275	0.733255	0.416914	0.362761	0.146264	0.395314	0.0380789	0.0123535	0.352487	0.0755937	0.0219024	0.053467	0.149401	0.197205
13	2	0	0	0	0	2	0.438139	1	0.327077	0	0	0.400141	0.269479	0.46822	0	0	0.783503	0.206729	0.0934892	0.332685	0.481678	7.82402e-23	33	41	39	28	34	23	13	0.45	0.527778	0.527778	0.388889	1	1.32008e-16	0.400622	4.66733e-17	0.690942	0.13652	1.26253e-15	1.27214e-15	0.750396	0.671368	0.602737	0.750871	0.874665	0.839642	5.65227e-15	4.84589e-15
13	2	0	0	0	1	6	0.293828	0.259628	0.416942	0.539994	0.481151	0.430083	0.492544	1	0.0981376	0.192819	0.189067	0.396002	0.492164	0	0.296194	1	33	41	39	28	34	23	13	0.45	0.527778	0.527778	0.388889	0.976295	0.263643	0.927613	0.398017	0.490552	0.45837	0.0436393	0.00653575	1	3.07463e-16	0.619358	7.77863e-17	0.994113	0.923875	0.0597604	0.0605798
13	2	0	0	1	0	8	0	0.835929	0	0.211434	0.201411	1	0.160873	0.655703	0.232604	0.181966	0	0	0.175626	0.453349	0.0257519	0.309708	33	41	39	28	34	23	13	0.45	0.527778	0.527778	0.388889	0.521199	0.136105	1	0.152936	0.34974	0.626615	0.25999	0.359994	0.75157	0.805139	1	0.841041	1	1	0.135905	0.181347
13	2	0	0	1	1	4	0.456811	0.920079	0.916121	0.444125	0.496744	0.786795	0.33344	0.870758	0.52867	0.384045	0.698097	0.720889	1	0.083169	0.235644	0.734284	33	41	39	28	34	23	13	0.45	0.527778	0.527778	0.388889	0.153303	0.129217	0.860529	0.142898	0.321285	0.82312	0.424892	0.424079	0.486928	1	0.806446	1	0.882907	0.710862	0.210666	0.202886
13	2	0	1	0	0	3	1	0.107713	0.239486	0.764159	0.963092	0	1	0	0.295486	0.502021	0.324508	0.171885	0	1	0.233986	0.343791	33	41	39	28	34	23	13	0.45	0.527778	0.527778	0.388889	0.43099	0.905576	0.174318	0.854439	0.782098	0.539728	0.0980435	0.107516	0.109547	0.2042	0.111514	0.234225	0.0219724	0.236623	0.0456962	0.0633912
13	2	0	1	0	1	6	0.152163	0.816498	1	0.985073	0.885961	0.743263	0.685559	0.969739	1	1	0.691725	0.73474	0.0673304	0.0731705	0	0.601184	33	41	39	28	34	23	13	0.45	0.527778	0.527778	0.388889	0.247187	1	6.07826e-16	1	6.80717e-17	4.67059e-15	0.149691	0.164443	0.0544599	0.498033	0.0900522	0.531091	0.161998	0.2626	0.0897422	0.0668899
13	2	0	1	1	0	7	0.980248	0	0.625956	0.0609984	0.0168662	0.156654	0.578413	0.722286	0.336167	0.491301	0.635855	0.421454	0.626028	0.00574808	1	0.520881	33	41	39	28	34	23	13	0.45	0.527778	0.527778	0.388889	1.34455e-17	0.864123	0.07796	0.788142	0.411057	0.229079	0.0956975	0.282518	1.24078e-17	0.0800532	5.62873e-16	0.0885786	1.13721e-17	4.84979e-15	0.0241939	0.121633
13	2	0	1	1	1	1	0.629047	0.560201	0.666413	1	1	0.30068	0	0.504847	0.788493	0.904147	1	1	0.333071	0.198187	0.17582	0.701576	33	41	39	28	34	23	13	0.45	0.527778	0.527778	0.388889	0.142209	0.855447	0.567358	0.800913	1	1	1	1	0.180809	0.0412573	0.497474	0.106201	0.172978	0.313132	1	1
13	3	1	0	0	0	8	1	0.83811	0	0.219543	0.0803979	0.289712	0.325232	0.617965	0	0	0.0491633	0.485613	0.586848	0.187085	0.162526	6.951e-23	33	41	39	28	34	23	13	0.55	0.444444	0.666667	0.416667	0.393164	1.63206e-16	1	5.30918e-17	4.1122e-17	2.92295e-15	2.29092e-16	2.31356e-16	0.355844	1	1	1	0.882586	0.731676	2.14904e-15	1.94218e-15
13	3	1	0	0	1	5	0.822383	0.506383	0.543252	0	0.0201236	0.428528	0.483483	1	0.151545	0.0623217	0.181345	0.331555	0.386649	0.00288623	0.716132	0.378884	33	41	39	28	34	23	13	0.55	0.444444	0.666667	0.416667	0.365402	0.202443	0.428432	0.388715	0.222925	0.853951	0.00446555	0.0944789	0.389701	0.484576	0.334276	0.483158	0.746541	0.563154	0.00658551	0.108583
13	3	1	0	1	0	4	0.175619	1	0.637844	1	0.896518	0.842757	0.70623	0	0.394372	0.622393	0	0.312625	0.482987	1	0.321057	0.197415	33	41	39	28	34	23	13	0.55	0.444444	0.666667	0.416667	1	0.253135	0.891644	0.554616	1	0.988819	1	1	1	0.0895084	0.747932	6.89475e-17	1	1	1	1
13	3	1	0	1	1	2	0.206099	0	1	0.533149	0.50077	0	0.155025	0.494489	0.0137379	0.0520824	1	0.359607	1	0.114665	0.674475	1	33	41	39	28	34	23	13	0.55	0.444444	0.666667	0.416667	0.100026	0.432255	0.711223	0.622826	0.523987	0.0197724	0.126458	0.0773265	0.226653	0.181589	0.451406	0.161534	0.554134	0.416816	0.438573	0.111858
13	3	1	1	0	0	7	0.943815	0.616763	0.150943	0.119238	0	0.214331	0.633834	0.127125	0.0466508	0.00354838	0.186608	0.166134	0.141137	0.470317	0	0.167508	33	41	39	28	34	23	13	0.55	0.444444	0.666667	0.416667	0.0122344	0.833016	0.0969009	0.824113	0.326612	0.28434	0.0179104	0.0206368	0.0422101	2.26532e-16	0.121585	0.0118332	0.0504981	0.130571	0.00762649	0.0252375
13	3	1	1	0	1	1	0	0.45223	0.619413	0.592114	0.477058	1	0.821696	0.72507	1	1	0.563007	0.644153	0.325864	0	0.398747	0.643557	33	41	39	28	34	23	13	0.55	0.444444	0.666667	0.416667	0.810258	0.919489	4.28878e-16	0.920798	0.558615	1	0.0244901	0.104574	0.401115	0.132053	0.010546	0.135966	0.19948	0.621795	0.0400724	0.192756
13	3	1	1	1	0	3	0.450922	0.747611	0.459172	0.928913	1	0.658353	1	0.422399	0.586408	0.810991	0.194496	1	0.905526	0.040156	1	0.420311	33	41	39	28	34	23	13	0.55	0.444444	0.666667	0.416667	0.557801	0.915718	0.0191001	0.899803	0.293533	0.796854	0.174963	0.166759	0.293746	0.109785	3.96873e-16	0.0871591	0.332474	0.632213	0.457455	0.350515
13	3	1	1	1	1	5	0.648564	0.689912	0.570161	0.180681	0.246297	0.098459	0	0.9081	0.000216935	0.0929397	0.696543	0	0	0.722988	0.0489775	0.339401	33	41	39	28	34	23	13	0.55	0.444444	0.666667	0.416667	7.9113e-18	1	0.342751	1	0.125379	0.111704	0.19911	0.181361	6.68491e-18	0.282639	0.254439	0.276507	1.05065e-17	3.33298e-15	0.382014	0.347287
13	4	1	0	0	0	8	0.774413	1	0.0181148	0	0	0	0	1	0	0	0	0	0	0.100203	0.00596743	0	33	41	39	28	34	23	13	0.425	0.722222	0.694444	0.527778	0.541992	0.740399	0.33508	0.737943	0.770961	0.262742	1	0.594604	0.194503	0.216986	0.450319	0.26444	0.173167	0.323299	1	1
13	4	1	0	0	1	2	0.449913	0.670418	0.457365	0.65091	0.616217	0.592261	1	0.437925	0.944517	0.890729	1	0.698434	0.62591	0.106954	0	0.504075	33	41	39	28	34	23	13	0.425	0.722222	0.694444	0.527778	0.139192	0.770489	0.445365	0.757382	8.31584e-17	0.0724256	0.766108	0.265388	0.0612765	0.249628	0.541917	0.295476	0.159409	0.129237	0.839105	0.265842
13	4	1	0	1	0	4	0.0712952	0.734543	0.52365	0.74743	1	1	0.622203	0.0622907	0.49056	0.468944	0.491043	0.55774	0.532026	0.852404	0.296392	0.115011	33	41	39	28	34	23	13	0.425	0.722222	0.694444	0.527778	0.876755	0.746264	0.74671	0.743548	1	1	0.74819	1	0.565428	0.22186	0.772502	0.266644	0.2913	0.817175	0.684204	0.751851
13	4	1	0	1	1	6	0.625487	0.668108	0.989781	0.37343	0.443059	0.541478	0.833427	0.403648	0.99074	0.942131	0.690578	1	1	0.286089	0.769136	0.347277	33	41	39	28	34	23	13	0.425	0.722222	0.694444	0.527778	0.0517571	0.825016	4.17756e-16	0.794502	0.671275	2.82506e-15	0.143157	0.0601827	0.00474579	0.337141	4.4239e-16	0.334489	0.0488149	0.00535142	0.0551265	0.0120492
13	4	1	1	0	0	2	1	0.641435	0	0.808827	0.963287	0.0941774	0.466636	0	0.365426	0.49447	0.827859	0.798961	0.437327	1	0.76709	9.52097e-23	33	41	39	28	34	23	13	0.425	0.722222	0.694444	0.527778	8.18377e-18	1	0.426109	1	0.529232	0.239092	0.170873	0.0827417	8.05028e-18	0.564941	0.39536	0.52313	1.01302e-17	3.99425e-15	0.118233	0.0709013
13	4	1	1	0	1	7	0.282792	0	1	0.541072	0.498568	0.886629	0.109052	0.691984	1	1	0.690156	0.522421	0.514337	0	1	1	33	41	39	28	34	23	13	0.425	0.722222	0.694444	0.527778	0.773971	1.46331e-16	0.891133	5.58398e-17	0.903857	0.450069	2.10898e-15	0.00503342	0.475339	0.82784	0.931861	0.866629	0.568667	0.620096	1.49241e-14	6.75155e-15
13	4	1	1	1	0	6	0.609433	0.76414	0.784102	0.662534	0.530259	0.22324	0.222228	0.427147	0.234235	0.399254	0.709038	0.863634	0.599529	0.84104	0.560455	0.151848	33	41	39	28	34	23	13	0.425	0.722222	0.694444	0.527778	0.309504	0.0256847	1	0.026629	0.915796	0.236947	0.0244412	8.5866e-16	0.343811	1	1	1	0.717789	0.555665	0.153507	0.0392821
13	4	1	1	1	1	4	0	0.730387	0.886431	1	0.964902	0.685208	0.0872926	0.567443	0.522372	0.589845	0.720314	0.696281	0.955986	0.0907255	0.718306	0.36108	33	41	39	28	34	23	13	0.425	0.722222	0.694444	0.527778	1	0.0188589	0.869435	0.137054	0.355786	0.515917	0.0318229	0.312477	1	1.69153e-16	0.771125	4.57265e-17	1	1	0.242045	0.370186
14	1	0	0	0	0	1	0.460646	0.631721	0.103525	1	1	0.382904	0.978415	0.235165	0.708689	1	0.036687	0.362404	0.710244	0.597499	0.142149	0.0905742	27	34	30	25	36	29	24	0.5	0.25	0.416667	0.305556	0.931459	0.21918	0.889923	0.286109	0.67845	0.752557	1	0.00889788	0.998374	6.57378e-16	0.479192	0.116854	1	0.996987	1	0.551965
14	1	0	0	0	1	3	0.325216	0	1	0.781084	0.658421	1	1	0.786884	1	0.714409	1	0.751116	0.953477	0.246639	0.12193	1	27	34	30	25	36	29	24	0.5	0.25	0.416667	0.305556	1	0.19241	1	0.264799	1	1	0.873995	2.63147e-15	1	0.305871	0.544379	0.344758	0.965442	1	0.983088	0.541853
14	1	0	0	1	0	5	0	0.705131	0.322413	0.307563	0.301078	0.209338	0.125025	0.253303	0	0.149738	0.375852	0	1	0	0.638954	0.00925308	27	34	30	25	36	29	24	0.5	0.25	0.416667	0.305556	0.423417	0	1.14079e-15	4.25313e-17	1.03055e-16	0.570068	2.92771e-14	1	0.439796	0.989079	1	1	0.601729	0.61686	0.0823091	1
14	1	0	0	1	1	8	0.950452	1	0.424336	0	0	0	0	0	0.175772	0	0	0.53632	0.854228	0.04283	0.720654	0.303859	27	34	30	25	36	29	24	0.5	0.25	0.416667	0.305556	0.329808	1.18065e-16	0.34393	0.0147727	0.305652	0.536318	0.106538	0.993638	0.439599	0.999588	0.931043	0.985617	0.617436	0.615303	0.201037	0.968136
14	1	0	1	0	0	2	1	0.54089	0	0.122314	0.117641	0.170681	0.698172	0.13226	0.362512	0.850083	0.0697729	1	0.074951	0.534443	0.272981	7.23611e-23	27	34	30	25	36	29	24	0.5	0.25	0.416667	0.305556	0.252594	0.885093	0.343524	0.806109	0.447052	0.291756	0.474791	0.016574	0.0950658	0.380965	5.62135e-16	0.233122	0.127463	0.244395	0.22413	2.37669e-14
14	1	0	1	0	1	4	0.584552	0.530738	0.565124	0.106689	0.00852888	0.490825	0.828258	1	0.568542	0.822968	0.578478	0.781994	0.0883015	1	1	0.256435	27	34	30	25	36	29	24	0.5	0.25	0.416667	0.305556	0.135465	0.852785	0.711996	0.771712	0.948921	0.276789	0.487188	0.0194242	0.0845078	0.023905	0.0864609	1.26555e-16	0.0863828	0.15613	0.280297	0.0333032
14	1	0	1	1	0	6	0.695448	0.25695	0.595441	0.500102	0.367277	0.359734	0.316701	0.0172976	0.395026	0.524006	0.851048	0.0418631	0	0.811974	0	0.0949344	27	34	30	25	36	29	24	0.5	0.25	0.416667	0.305556	0.018814	1	0.177009	1	0.413516	4.35697e-15	0.0694907	0.932834	1.00836e-17	1	0.24796	0.788519	8.33252e-18	3.39261e-15	3.88764e-14	0.600921
14	1	0	1	1	1	2	0.818686	0.839402	0.43487	0.238746	0.0559135	0.0982969	0.843518	0.514648	0.225132	0.579122	0.341388	0.569623	0.0273011	0.703711	0.351226	0.162912	27	34	30	25	36	29	24	0.5	0.25	0.416667	0.305556	1.28612e-17	0.852966	0.650637	0.784528	0.388494	0.030251	0.36293	0.354315	0.0287858	0.291798	0.125914	0.194385	0.0756594	0.0876585	0.149347	0.114686
14	3	0	0	0	0	7	0.209201	0.209464	0.37955	0.287657	0.283825	0.788903	0.498621	0.575869	0.866292	0.918736	0.633639	0.0433695	0.933898	0.0669607	0.0542685	0.432713	27	34	30	25	36	29	24	0.5	0.305556	0.5	0.388889	0.0255034	0.77838	0.817733	0.749554	0.210772	0.0480501	0.685746	0.0407375	0.0527735	0.127815	0.32037	0.0714736	0.100768	0.124231	0.02887	0.0328204
14	3	0	0	0	1	6	0.181575	0.503189	1	0.1322	0.269166	1	0.504209	0.657542	1	0.811989	0.772745	0	0.474095	0.755755	0.203322	0.96242	27	34	30	25	36	29	24	0.5	0.305556	0.5	0.388889	1.01469e-17	0.92622	0.612369	0.884199	0.80519	2.31477e-15	1	0.260003	8.559e-18	0.554439	2.09842e-15	0.386495	0.00102078	3.48099e-15	5.19273e-14	0.0115244
14	3	0	0	1	0	4	0	0.97802	0	0.173162	0.180058	0.448419	0	0	0	0.346505	0	1	0.422456	0.0397902	0.305447	2.50472e-22	27	34	30	25	36	29	24	0.5	0.305556	0.5	0.388889	0.272798	0	1.17926e-15	4.66047e-17	7.55988e-17	0.161965	0.0312998	0.955318	0.418718	0.979175	0.991092	1	0.748374	0.636828	0.123455	0.90286
14	3	0	0	1	1	8	0.655682	0.301595	0.788961	0.0927229	0.0826493	0.267145	0.397166	0.738521	0.247807	0	0.841635	0.656322	0.762152	0.0951138	0.674217	1	27	34	30	25	36	29	24	0.5	0.305556	0.5	0.388889	0.274724	1.25826e-16	0.627462	0.0458331	0.0840183	0.224583	2.75712e-14	1	0.426607	1	0.698821	0.979565	0.701324	0.621887	0.169426	1
14	3	0	1	0	0	3	0.446801	0.39817	0.40537	1	1	0.76815	0.991518	0.455832	0.771651	1	1	0.548452	0	1	0	0.283503	27	34	30	25	36	29	24	0.5	0.305556	0.5	0.388889	1	0.204133	0.709922	0.336747	0.474109	1	0.569729	0.011113	1	3.34507e-16	0.975271	9.13697e-17	1	1	1	0.476091
14	3	0	1	0	1	1	1	0	0.607502	0	0	0	1	1	0.654098	0.58327	0.361797	0.490937	0.270829	0.526437	0.661724	0.382897	27	34	30	25	36	29	24	0.5	0.305556	0.5	0.388889	0.744239	0.0981582	1	0.192002	0.4014	0.378977	0.638685	2.33738e-15	0.74935	0.849756	1	0.843389	0.982853	0.886866	0.824376	0.328595
14	3	0	1	1	0	5	0.743647	0.0954325	0.187948	0.209267	0.332138	0.00680972	0.39907	0.384146	0.570897	0.787402	0.511408	0.0626465	0.153986	0.56364	0.525101	0.155883	27	34	30	25	36	29	24	0.5	0.305556	0.5	0.388889	0.206086	1	0.777324	1	0.931859	0.216845	0.646744	0.0377565	0.102285	0.755119	0.0129145	0.630428	0.0930476	0.203927	0.374189	0.126217
14	3	0	1	1	1	8	0.236489	1	0.326253	0.0979619	0.222031	0.369134	0.52541	0.694992	0.50938	0.727797	0.689	0.517517	1	0	1	0.854571	27	34	30	25	36	29	24	0.5	0.305556	0.5	0.388889	0.0862465	0.841017	0.996289	0.81122	1	0.126496	0.46554	0.0518128	0.0433426	0.271392	0.174842	0.170641	9.45427e-18	0.0485271	0.277467	1.83283e-14
14	2	1	0	0	0	3	0	0	0.475985	0	0	1	0.393213	0.491197	1	0.734331	0.690169	0	0.758501	0.614379	0.188473	0.349028	27	34	30	25	36	29	24	0.525	0.333333	0.444444	0.333333	0.0793231	0.830992	0.500799	0.759383	0.559628	0.0722808	0.00281956	0.0083431	0.0195054	4.33516e-16	0.226945	1.01913e-16	0.0309784	0.075178	0.0559541	1.47273e-14
14	2	1	0	0	1	1	0.349332	0.540518	0.82174	0.236746	0.206864	0.968197	0.562512	0.170712	0.81495	0.459656	0.583776	0.19491	0.800757	0.562796	0.21337	1	27	34	30	25	36	29	24	0.525	0.333333	0.444444	0.333333	0.229689	0.962743	0.618174	0.901826	0.611885	0.0646845	0.00566255	0.0309028	0.03906	0.480372	0.199306	0.328087	0.0238594	0.0919409	0.0385038	0.00594853
14	2	1	0	1	0	5	0.883381	0.644975	0	0.632264	0.710595	0	0.538874	0.228333	0	0	0.0204194	1	0.478935	0	1	0.173894	27	34	30	25	36	29	24	0.525	0.333333	0.444444	0.333333	1.16503e-17	0.0436991	1.06824e-15	0.00835299	8.4673e-17	0.132035	1	0.992977	0.27288	0.779868	1	0.869098	0.592172	0.457735	1	0.952057
14	2	1	0	1	1	6	0.0167146	0.700803	0.92868	0.496602	0.559054	0.852748	0	0	0.55492	0.756831	0.457015	0.600874	1	0.190203	0.697772	0.939894	27	34	30	25	36	29	24	0.525	0.333333	0.444444	0.333333	0.30552	1.34469e-16	0.350881	5.28032e-17	0.491754	0.54508	0.0399075	0.846768	0.465877	1	0.796049	1	0.664508	0.610075	0.105405	0.775995
14	2	1	1	0	0	2	0.442499	1	0.318032	1	1	0.765927	0.459759	0.195037	0.521358	0.414458	0.243959	0.472564	0.188262	0.537228	0.0153771	0.387242	27	34	30	25	36	29	24	0.525	0.333333	0.444444	0.333333	0.0748887	1	0.314686	1	0.348066	0.0207474	0.0817957	1	1.05115e-17	0.674483	9.0628e-16	0.57556	1.03074e-17	0.0298476	0.0176126	1
14	2	1	1	0	1	4	1	0.787972	0.413741	0.246695	0.175021	0.63965	0.200522	0.025204	0.419628	0.52179	0.117753	0.429105	0.271323	0.340878	0.112385	0.506868	27	34	30	25	36	29	24	0.525	0.333333	0.444444	0.333333	0.00488837	0.915829	0.36749	0.90369	0.20636	2.68262e-15	2.26201e-15	0.754787	0.000512952	0.368855	0.0875513	0.351818	0.000829067	3.37893e-15	1.99354e-14	0.554806
14	2	1	1	1	0	7	0.766088	0.929893	0.205407	0.792022	0.858256	0.392371	0.330504	0.53758	0.157484	0.147512	0	0.91556	0	0.505751	0	1.2828e-22	27	34	30	25	36	29	24	0.525	0.333333	0.444444	0.333333	1	0.0808944	0.528064	0.126277	1	1	0.00619909	2.16053e-15	1	0.677475	0.715703	0.698503	0.942938	1	0.360886	0.323208
14	2	1	1	1	1	8	0.786396	0.102955	1	0.00183054	0.0897527	0.0907379	1	1	0.400906	1	1	0.161067	0.211402	1	0.00745851	0.638539	27	34	30	25	36	29	24	0.525	0.333333	0.444444	0.333333	0.586969	0.12538	1	0.174243	0.732334	0.569281	0.0715662	0.0545979	0.786756	0.471724	0.533519	0.430992	1	0.872684	0.394831	0.250765
14	4	1	0	0	0	4	0.326404	0.530418	0.461706	0.220572	0.289541	0.601872	0.285996	0.324756	0.416682	0.277623	0.630547	0.849707	0.755679	0.343568	0.248937	0.166606	27	34	30	25	36	29	24	0.625	0.305556	0.5	0.416667	1	0.232162	0.896499	0.326767	1	1	1	0.512957	1	0.0723184	0.53748	0.0788495	0.993708	1	1	0.943691
14	4	1	0	0	1	6	0	0	1	0.0142319	0.0379947	1	1	0.734068	1	1	0.842584	0.234286	0.763212	0.538281	0.478301	1	27	34	30	25	36	29	24	0.625	0.305556	0.5	0.416667	0.757197	0.215018	1	0.347212	0.645008	0.877553	0.488313	0.0235967	0.934823	4.6231e-16	0.714912	1.07429e-16	1	0.924104	0.773717	0.438202
14	4	1	0	1	0	2	0.844168	0.988178	0.360214	1	1	0	0	1	0	0	1	1	1	0.0215594	1	1.38463e-22	27	34	30	25	36	29	24	0.625	0.305556	0.5	0.416667	0.257376	0	9.36394e-16	4.40611e-17	7.80117e-17	2.49398e-15	1.52345e-14	0.872849	0.334829	0.977982	0.850641	0.992157	0.61269	0.441219	3.27751e-14	0.725199
14	4	1	0	1	1	3	1	1	0.436498	0	0	0.197873	0.0912878	0.391339	0.148435	0.103234	0	0	0.432983	0	0.731371	0.469915	27	34	30	25	36	29	24	0.625	0.305556	0.5	0.416667	0.00337574	1.19336e-16	0.613177	0.0260279	0.148142	0.0696841	0.0732901	0.723258	0.377661	1	1	1	0.71079	0.489333	0.192122	0.628601
14	4	1	1	0	0	7	0.823712	0.809321	0.52326	0.587633	0.790213	0.0161407	0.363974	0.467636	0.0764685	0.11299	0.264684	0.88799	0.239286	0.768844	0	0.371202	27	34	30	25	36	29	24	0.625	0.305556	0.5	0.416667	0.0546295	1	0.250449	1	0.584365	0.118573	0.470239	0.00336898	0.0393901	0.865964	8.89894e-16	0.714409	0.074358	0.0902972	0.32805	0.0274798
14	4	1	1	0	1	1	0.784595	0.619627	0.53892	0.106621	0.159561	0.589103	0.344839	0.158547	0.736601	0.739455	0.186357	0.0511486	0.326512	1	0.098024	0.23435	27	34	30	25	36	29	24	0.625	0.305556	0.5	0.416667	0.0731951	0.970152	0.500835	0.93653	0.68483	0.0698189	0.699713	0.0435287	0.0221411	0.729323	0.205812	0.538307	0.0647891	0.104294	0.291576	1.86251e-14
14	4	1	1	1	0	5	0.955143	0.677023	0	0.258942	0.407698	0.0784097	0.33525	0.97631	0.113064	0.212411	0.293064	0.318053	0	0.958634	0.0497742	0.0380276	27	34	30	25	36	29	24	0.625	0.305556	0.5	0.416667	0.0102746	0.983166	0.504296	0.989151	0.410087	0.0591203	0.269115	2.21613e-15	9.63725e-18	0.891622	0.212002	0.74254	1.00157e-17	0.00214367	0.172987	0.00651016
14	4	1	1	1	1	4	0.728573	0.914677	0.289612	0.248834	0.40258	0.453361	0.134073	0	0.417722	0.286307	0.470631	0.594487	0.131641	0.0171303	0.0138736	0.225598	27	34	30	25	36	29	24	0.625	0.305556	0.5	0.416667	1.16024e-17	0.859367	0.779361	0.815521	0.586687	0.0416564	0.261902	1	0.00229879	0.217339	0.496456	0.15722	0.0264622	3.64167e-15	0.159021	1
15	1	0	0	0	0	4	0	0	0.172657	1	1	1	0.337509	0	1	0.802586	0.723946	0.803426	1	0.13019	0.234226	0.298096	31	43	39	39	36	19	18	0.525	0.0555556	0.25	0.111111	1	4.33853e-05	0.572112	0.513599	0.862268	1	0.548864	0.818271	1	0.189472	0.566516	0.159776	0.947897	1	0.940433	1
15	1	0	0	0	1	7	0.744547	0.457666	0.96237	0.429542	0.358842	0.0196722	1	0.763101	0.589483	0.880446	0.441729	0.668626	0.609003	0.127309	0.631268	0.797216	31	43	39	39	36	19	18	0.525	0.0555556	0.25	0.111111	0.453705	0	9.67303e-16	6.13694e-17	0.726465	0.64132	0.382876	0.713293	0.737311	1	0.908698	0.986946	0.86361	0.767909	0.68855	0.636614
15	1	0	0	1	0	8	0.872975	0.783176	0.35455	0.116724	0.228527	0	0.3687	0.274342	0.194565	0.363856	0.275782	0.72042	0.871913	0.221899	0.289112	0.38055	31	43	39	39	36	19	18	0.525	0.0555556	0.25	0.111111	0.312779	2.18115e-16	1	0.523273	0.906489	0.286908	0.585763	0.425948	0.802111	0.163389	0.78049	0.0966972	1	0.793114	1	0.709564
15	1	0	0	1	1	4	0.479704	1	1	0	0	0.170812	0.22269	1	0	0	0.850626	0.154907	0.99582	0.234999	0.235137	0.793581	31	43	39	39	36	19	18	0.525	0.0555556	0.25	0.111111	0.0568374	0	0.136762	0.00868111	1	0.170868	0.420238	7.02111e-14	0.675133	1	1	1	0.92759	0.726608	0.745863	0.553847
15	1	0	1	0	0	6	1	0.586296	0.0901259	0.473061	0.487672	0.142907	0.598873	0.65273	0.286614	0.522713	0.778731	1	0.094302	0.615954	0.231916	1.59476e-22	31	43	39	39	36	19	18	0.525	0.0555556	0.25	0.111111	0.263624	1	0.443379	1	0.578126	0.201102	0.0602753	0.871415	0.110202	0.0751316	0.255445	0.0743839	0.100488	0.158361	0.0225173	0.217686
15	1	0	1	0	1	2	0.371843	0.0900453	0.675163	0.0977272	0.168319	0.302093	0.146592	0.779954	0.241423	0.104196	1	0	0	1	1	1	31	43	39	39	36	19	18	0.525	0.0555556	0.25	0.111111	0.175393	0.96696	0.25735	0.946934	0.769769	0.110973	0.279208	1	0.042992	0.0207112	0.0803854	0.00163403	1.07673e-17	0.0386431	0.303825	0.200537
15	1	0	1	1	0	3	0.126282	0.723036	0	0.184844	0.204111	0.632167	0	0.482144	0.732452	1	0.776825	0.50461	0.0991574	0.696834	0.285143	0.328057	31	43	39	39	36	19	18	0.525	0.0555556	0.25	0.111111	2.1859e-17	0.968744	0.12783	0.963976	4.81902e-17	2.08745e-15	1	0.869751	1.23595e-17	0.0829782	6.88097e-16	0.0511559	0.0325384	4.18234e-15	8.06451e-14	3.42718e-14
15	1	0	1	1	1	7	0.752811	0.812428	0.392017	0.663527	0.649227	0.0230957	0.223243	0.964066	0.692753	0.957602	0	0.931789	0.0664743	0	0	0.688709	31	43	39	39	36	19	18	0.525	0.0555556	0.25	0.111111	0.210548	0.9376	0.429328	0.94233	0.36519	0.167678	4.70945e-14	0.983012	0.0989372	3.64728e-16	0.267767	8.33478e-17	0.0935743	0.0986095	0.00244726	0.23535
15	3	0	0	0	0	1	0.520247	0.954693	0.359443	0.237451	0.152808	0.417078	0.508448	0	0.132568	0.230478	0.24212	0	1	0.272759	0.278654	0.105964	31	43	39	39	36	19	18	0.4	0.166667	0.138889	0.611111	0.235885	1	0.332778	1	0.200328	0.120895	0.00123581	0.00659603	0.0747894	0.328941	0.081271	0.319448	0.0550716	0.0727781	0.00524958	0.0389601
15	3	0	0	0	1	5	0.480836	0.910696	1	0.404746	0.576049	0.347665	0.454686	0.514411	0.24815	0.318632	0.30803	0.154483	0.998181	0.242747	0.357696	0.356841	31	43	39	39	36	19	18	0.4	0.166667	0.138889	0.611111	0.873894	0	9.66379e-16	5.49635e-17	0.691714	1	1	1	0.872156	0.904952	0.459941	0.919681	0.825218	0.94395	1	1
15	3	0	0	1	0	4	0	0.980438	0.399225	0.896335	1	0.486951	1	0.374904	0.0382252	0.0817883	0.719825	0.858621	0	0.0168445	0	3.72205e-22	31	43	39	39	36	19	18	0.4	0.166667	0.138889	0.611111	0.268665	0.94546	0.289875	0.934917	5.24422e-17	0.106821	2.24606e-15	0.00256113	0.0680891	0.22538	1.36637e-15	0.22734	0.117562	0.168583	1.5686e-14	0.029617
15	3	0	0	1	1	6	0.455279	0.908861	0.769964	0.724685	0.643056	0.107242	0.365535	0.506497	0.280801	0.283797	0.543582	0.538796	0.748395	0.459768	0.0549548	0.613429	31	43	39	39	36	19	18	0.4	0.166667	0.138889	0.611111	0.603852	0.167986	1	0.423217	0.589865	0.323927	0.0570401	0.0137926	1	0.0778682	1	0.114541	0.994404	0.980265	0.324887	0.33831
15	3	0	1	0	0	8	0.417831	0.916892	0	1	0.851175	0	0.189796	0.726899	0	0	0.248606	0.857157	0.680595	0.717707	0.367164	0.102561	31	43	39	39	36	19	18	0.4	0.166667	0.138889	0.611111	0.856997	1.61119e-16	0.47821	0.147555	1	0.405561	0.0369193	0.014382	0.921738	1	0.47241	1	0.769297	0.579215	0.148787	0.360006
15	3	0	1	0	1	3	0.780951	0.99383	0.41147	0.453342	0.658688	0.3447	0.172963	0.618902	0.151493	0.192699	1	1	0.95059	0	1	1	31	43	39	39	36	19	18	0.4	0.166667	0.138889	0.611111	4.23357e-17	0.931519	0.485507	0.933925	0.287392	3.0473e-15	0.00273554	0.0109546	1.3649e-17	0.197365	0.418942	0.226994	9.49446e-18	4.20133e-15	0.00079651	1.3387e-14
15	3	0	1	1	0	7	1	0	0.15796	0.603827	0.336114	1	0.271104	0.160283	1	1	0	0.293557	0.22261	1	0.286414	0.315817	31	43	39	39	36	19	18	0.4	0.166667	0.138889	0.611111	1	0.146958	0.507897	0.396445	0.498918	0.310207	0.049103	2.39779e-15	0.983871	2.90719e-16	0.511102	7.53425e-17	1	1	0.31686	0.320583
15	3	0	1	1	1	2	0.756728	1	0.644561	0	0	0.309659	0	1	0.254481	0.343584	0.432081	0.315576	0.418327	0.528221	0.240525	0.903919	31	43	39	39	36	19	18	0.4	0.166667	0.138889	0.611111	0.166234	0.923905	0.416037	0.887116	0.433691	0.096288	0.0264059	0.0101982	0.0239702	0.183006	0.278116	0.14519	0.000555159	0.0352827	0.0854357	0.0504836
15	2	1	0	0	0	1	0.655371	0.763771	0	1	1	0.184684	0.360097	0	0.205315	0.163914	0	0.433987	0.816765	0.233013	0.0144059	0.520149	31	43	39	39	36	19	18	0.65	0.0277778	0.333333	0.194444	0.0433382	0.992829	0.652746	0.975312	0.460597	0.0365308	1	0.151442	0.0494503	0.536307	0.0546502	0.499086	0.0479536	0.029698	6.1201e-14	0.0776286
15	2	1	0	0	1	5	1	0.816537	0.976123	0	0.266058	0.00527702	0.554008	0.626879	0.0723742	0.0557685	0.703148	0.0384953	0.780384	0.347058	1	1	31	43	39	39	36	19	18	0.65	0.0277778	0.333333	0.194444	0.256649	1.30612e-16	0.304509	0.0138467	1.25463e-16	0.203202	3.92393e-14	0.97669	0.712867	0.96698	0.894113	0.979518	0.815588	0.70905	0.334994	0.746605
15	2	1	0	1	0	5	0.953632	0.791363	0.5479	0.383538	0.651468	1	0.876054	0.0332066	0.469837	0.611034	0.565088	0.300028	0.977259	0	0.446029	1.25641e-22	31	43	39	39	36	19	18	0.65	0.0277778	0.333333	0.194444	0.308931	1	0.607233	0.994908	0.492323	0.0849942	0.264396	0.0387681	0.0517442	0.564171	6.30047e-16	0.524689	0.0423064	0.0990586	0.0905041	0.0717899
15	2	1	0	1	1	7	0.233666	1	0.693281	0.35454	0.456519	0.390216	0.315854	0.983772	0.390197	0.256838	0.680444	0	1	0.165497	0.97929	0.808212	31	43	39	39	36	19	18	0.65	0.0277778	0.333333	0.194444	0.378386	0	1.28611e-15	5.07693e-17	1	0.905294	0.218338	0.0263389	0.805007	0.967317	0.803404	0.971165	0.7756	0.721879	0.418342	0.449898
15	2	1	1	0	0	8	0.890471	0.929789	0.213621	0.040825	0	0.362031	0.57802	0.625022	0.224728	0.270834	0.195566	0.0591256	0.127903	0.702918	0	0.660522	31	43	39	39	36	19	18	0.65	0.0277778	0.333333	0.194444	0.748296	0.0800822	0.921344	0.0311458	0.769076	1	0.362578	1	0.726129	1	1	1	0.819013	0.85819	0.456849	1
15	2	1	1	0	1	4	0	0	1	0.482897	0.849856	0.695361	0	1	0.719805	0.540149	1	0.523894	0.618451	0.0924371	0.0643936	0.978447	31	43	39	39	36	19	18	0.65	0.0277778	0.333333	0.194444	6.13505e-17	0.98267	0.565071	1	0.586163	0.116218	0.324333	0.0735043	0.0686789	0.506358	0.249634	0.52103	0.0173897	4.38798e-15	0.0312917	0.142336
15	2	1	1	1	0	3	0.784593	0.504089	0.322223	0.528468	0.862403	0	0.511849	0.14435	0	0	0.215186	0.212235	0.130636	0.695382	0.233262	0.635425	31	43	39	39	36	19	18	0.65	0.0277778	0.333333	0.194444	0.163975	0.979253	1	0.959497	0.562437	4.57113e-15	0.197581	0.0495938	1.54412e-17	0.48726	0.0710743	0.459296	1.01506e-17	0.0410464	0.0153577	3.00424e-14
15	2	1	1	1	1	1	0.67982	0.73271	0.916189	0.194576	0.4107	0.402874	1	0.514717	1	1	0.353134	1	0	1	0.0484483	0.968974	31	43	39	39	36	19	18	0.65	0.0277778	0.333333	0.194444	1	0.234266	0.923925	0.344718	0.889564	0.563013	0.681881	4.45376e-15	1	2.78425e-16	0.242979	6.27568e-17	1	1	1	0.557091
15	4	1	0	0	0	2	0.785542	0.495029	0.0620207	0.253462	0.217748	0.0142496	0	0.377427	0.107839	0.178882	0.0880224	0.0462458	0.416961	0	0.567155	0.11172	31	43	39	39	36	19	18	0.025	0.222222	0.0277778	0.472222	0.00463297	0	8.89766e-16	4.86242e-17	0.136732	5.25808e-15	3.83372e-14	1.00959e-14	0.669332	0.993984	0.583054	0.959442	0.864973	0.739188	0.322436	0.147844
15	4	1	0	0	1	6	0.63973	0.691515	1	0.0179113	0.0151083	0.40496	1	0.866371	0.608163	0.568135	1	0.781546	0.616377	1	1	1	31	43	39	39	36	19	18	0.025	0.222222	0.0277778	0.472222	0.470846	0	0.488933	0.0267285	0.389511	0.634738	0.211906	0.063215	0.740844	0.993984	1	1	0.841796	0.754302	0.488647	0.365639
15	4	1	0	1	0	6	0.575878	0.719072	0.443724	1	1	0.0041608	0.143717	0	0.0168884	0.0102627	0.936557	0.909559	1	0.0945414	0.0353464	0.208414	31	43	39	39	36	19	18	0.025	0.222222	0.0277778	0.472222	1	0.195177	0.758681	0.318646	0.545135	1	0.384806	0.152053	1	2.73354e-16	0.350653	6.11062e-17	1	1	1	0.793768
15	4	1	0	1	1	3	0.926344	1	0.576899	0	0	0	0.207359	0.851145	0	0	0.771195	0	0.308249	0.777054	0.718867	0.115529	31	43	39	39	36	19	18	0.025	0.222222	0.0277778	0.472222	0.259089	1.33687e-16	0.438556	0.0181956	1	0.86191	0.136838	0.0903738	0.818988	1	0.987445	0.998964	0.847325	0.781213	0.498431	0.586776
15	4	1	1	0	0	2	0.862688	0.716291	0	0.51121	0.559595	0.0202495	0.0357553	0.667385	0.0447771	0.110179	0.591832	0.259974	0.239609	0.811845	0.046015	0.119675	31	43	39	39	36	19	18	0.025	0.222222	0.0277778	0.472222	0.192396	0.907819	0.586329	0.852168	1.29524e-16	0.225815	0.280543	0.119794	0.108236	0.370038	0.219849	0.369803	0.132496	0.240991	0.195578	0.176123
15	4	1	1	0	1	7	1	0.82708	0.266663	0.0977445	0.105146	0.00165034	0.250905	0.73001	0.0456861	0.0856927	0.309303	0.446716	0.0834862	0.869429	0.718731	0.423	31	43	39	39	36	19	18	0.025	0.222222	0.0277778	0.472222	0.0468651	0.97969	1	0.97506	0.751543	0.127785	0.357642	0.157171	0.0322425	0.576655	0.641721	0.590412	0.0150836	0.0556467	0.199617	0.139766
15	4	1	1	1	0	1	0	0.540546	0.352836	0.191204	0.142424	1	0.378626	0.126868	1	1	0.368713	0.883117	0.0653097	0.388315	0.128675	2.70615e-22	31	43	39	39	36	19	18	0.025	0.222222	0.0277778	0.472222	0.332385	0.992242	0.49271	0.93435	0.676963	0.392884	1	1	0.150176	0.559373	6.12228e-16	0.495729	0.145353	0.316935	0.532766	1
15	4	1	1	1	1	5	0.872845	0	0.370004	0.261967	0.269772	0.00624665	0.125533	1	0.0880936	0.187837	0	1	0	0.612777	0	0.466954	31	43	39	39	36	19	18	0.025	0.222222	0.0277778	0.472222	3.98902e-17	1	0.835904	1	0.639367	0.0404017	0.270319	0.177876	1.63996e-17	0.599964	0.535107	0.606349	1.16531e-17	4.81315e-15	9.124e-14	4.8769e-14
16	1	0	0	0	0	4	0.0410651	0.120352	0.602752	0.123903	0.168177	0	0.290625	0.643205	0.11667	0.184098	1	0	1	0.0769467	0.324136	0.257304	28	27	33	40	18	30	15	0.2	0.0833333	0.138889	0.222222	0.657468	0.0234746	0.72743	0.0201988	0.092414	0.508254	0.24813	0.0231405	0.67083	0.0501228	0.741998	0.0754474	0.87243	0.89294	0.631427	0.275484
16	1	0	0	0	1	3	1	0.324054	0.428264	0.348007	0.0428122	0.882387	1	0.231881	0.730226	0.165045	0	0.377542	0.429136	0.292417	0.185512	0.665745	28	27	33	40	18	30	15	0.2	0.0833333	0.138889	0.222222	0.586674	0.100028	1	0.18425	1	0.761531	0.320384	2.53431e-15	0.741371	0.372825	1	0.408126	0.896291	0.861106	0.669381	0.33544
16	1	0	0	1	0	1	0.940886	0.829046	0.340648	0.111355	0.61042	0.825586	0.0995021	0	0.464597	0	0.0927189	0.203033	0.737056	0	0	0.30813	28	27	33	40	18	30	15	0.2	0.0833333	0.138889	0.222222	1	1.44124e-16	0.586982	6.20309e-17	0.125447	0.509077	0.415581	1	1	3.06558e-16	0.702054	8.77814e-17	1	1	0.925593	1
16	1	0	0	1	1	2	0	1	1	0	0	0.819918	0	1	1	1	0.704215	0.402341	0.523776	0.893829	0.393355	1	28	27	33	40	18	30	15	0.2	0.0833333	0.138889	0.222222	0.730217	0.0717891	0.991106	0.0752453	0.188339	1	0.442512	0.110199	0.817956	0.200335	0.929274	0.188708	0.93335	0.985594	1	0.451753
16	1	0	1	0	0	6	0.0597589	0	0	0.581044	0.647537	0.167511	0.403955	0.422027	0	0.0534017	0.754568	0.576697	0.235374	0.266	1	2.37237e-22	28	27	33	40	18	30	15	0.2	0.0833333	0.138889	0.222222	1.35724e-17	0.851	8.00026e-16	0.78769	6.66269e-17	4.1852e-15	1.44843e-14	0.034886	7.45991e-18	0.608309	7.99715e-16	0.592502	8.38102e-18	3.9095e-15	3.61952e-14	1.37404e-14
16	1	0	1	0	1	6	0.707609	0.749363	0.415512	1	1	0.517481	0.5937	0.338578	0.711044	0.763367	0.627934	1	0.269711	1	0.0591911	0.209729	28	27	33	40	18	30	15	0.2	0.0833333	0.138889	0.222222	0.165661	0.890924	0.458973	0.844499	0.492804	0.187598	0.257712	0.0640464	0.0472847	0.703978	0.336333	0.684092	0.0322708	0.114535	0.214127	0.0855839
16	1	0	1	1	0	3	0.707609	0.749363	0.415512	1	1	0.517481	0.5937	0.338578	0.711044	0.763367	0.0563501	0.861938	0	0.603236	0.257723	0	28	27	33	40	18	30	15	0.2	0.0833333	0.138889	0.222222	0.344371	0.845598	0.530858	0.799505	0.343802	0.492118	0.03686	0.272812	0.0942004	0.593902	0.515253	0.627395	0.0291337	0.138165	0.0476931	0.2643
16	1	0	1	1	1	2	0.474719	0.09671	0.396729	0.853313	0.786687	1	0.438352	0.017405	0.957555	0.767835	0.282364	0.204894	0.25885	0.661582	0.762557	0.234928	28	27	33	40	18	30	15	0.2	0.0833333	0.138889	0.222222	0.118624	1	0.397881	1	0.181108	0.363904	1	0.447802	0.0554429	1	0.417162	1	0.0302413	0.112185	0.208047	0.299142
16	2	0	0	0	0	7	0.384195	0.769636	0.4748	0	0	0	0.224588	0.810671	0.0498347	0.0323973	0.739296	0	0.826137	0.764089	0	0.447261	28	27	33	40	18	30	15	0.325	0.0555556	0.138889	0.222222	1	0.0854666	0.394148	0.170677	0.283963	0.805651	0.478216	2.41819e-15	1	0.438445	0.511262	0.472995	0.985597	0.914008	0.839276	0.322184
16	2	0	0	0	1	1	0.812993	0.244016	0.429572	0.503457	0.635521	0.267842	0.417162	1	0.35929	0.247676	0.506105	0.2678	0.751443	0.3653	0.319526	0.447043	28	27	33	40	18	30	15	0.325	0.0555556	0.138889	0.222222	0.97379	0.104399	0.6717	0.227459	1.34229e-16	1	0.468531	0.064284	0.786925	0.765675	0.8589	0.918643	0.912571	1	0.788166	0.293382
16	2	0	0	1	0	5	0.648993	0.456373	0.302043	1	1	1	0	0.75707	0.246321	0.0848057	0.324349	0.746826	0.80668	0.723222	0.0355417	0.291448	28	27	33	40	18	30	15	0.325	0.0555556	0.138889	0.222222	0.919013	1.71677e-16	0.34933	7.76675e-17	0.638553	0.484694	0.659347	0.957672	0.974761	5.21495e-16	0.523166	1.62144e-16	1	0.924343	1	0.869741
16	2	0	0	1	1	8	0.241283	1	0.578028	0.557981	0.732698	0.086282	0.398811	0.36874	0.402505	0.631432	0.253222	0.237733	1	0	0.158587	0.217457	28	27	33	40	18	30	15	0.325	0.0555556	0.138889	0.222222	0.832168	0.124106	1	0.240117	0.392376	0.557703	0.250398	1	0.646743	0.758802	1	0.85755	0.807311	0.747725	0.420542	0.824963
16	2	0	1	0	0	4	0	0.348309	0.231794	0.785168	0.509078	0.173273	0.421677	0	0.66005	0.688656	0.23641	0.403872	0.0732693	0.779845	1	0.00794746	28	27	33	40	18	30	15	0.325	0.0555556	0.138889	0.222222	0.17912	0.837001	0.175813	0.736284	0.793116	0.0826267	2.19968e-14	0.0254196	0.062056	0.483009	7.10388e-16	0.386548	0.0966148	0.219756	4.01007e-14	1.25042e-14
16	2	0	1	0	1	7	1	0.240627	0.412403	0.278404	0.0730937	0.0968452	1	0.178608	1	1	0.438555	0.3516	0	0.66705	0.097642	0.705714	28	27	33	40	18	30	15	0.325	0.0555556	0.138889	0.222222	0.292058	0.952741	0.336151	0.923021	0.970062	3.02877e-15	0.108195	0.0209566	0.0840322	0.830048	0.0980138	0.719653	0.0778785	0.149194	0.150536	0.0617504
16	2	0	1	1	0	1	0.623223	0.152349	0	0.61772	0.554415	0.112378	0.328046	0.734298	0	0	0	0.579854	0.178258	0.0854932	0.466467	2.16175e-22	28	27	33	40	18	30	15	0.325	0.0555556	0.138889	0.222222	1.65513e-17	0.908544	6.40381e-16	0.851835	0.871649	0.000617432	0.483989	0.648451	7.76205e-18	0.715424	0.0595691	0.598323	8.36432e-18	3.43528e-15	0.00560538	0.39118
16	2	0	1	1	1	4	0.270296	0	1	0.167086	0.0928484	0.233649	0.614578	0.247421	0.872436	0.888319	1	1	0.690717	1	0.947247	1	28	27	33	40	18	30	15	0.325	0.0555556	0.138889	0.222222	0.079378	1	0.45553	1	1	0.206122	1	0.996235	0.0940262	1	0.314172	1	0.105416	0.204347	0.315319	1
16	3	1	0	0	0	6	1	1	0.22938	0.437121	0.331791	0.813393	0.328898	0.810306	0.282412	0.741315	0.22903	0.153086	0.363549	0.737105	0.238269	0.233626	28	27	33	40	18	30	15	0.225	0.194444	0.111111	0.277778	0	0	0	0	0	0	0	0	0	0	0	0	0	0	0	0
16	3	1	0	0	1	5	0.911563	0.899183	0.450012	0	0	0.044156	1	0	0.454243	0.521852	0	0	0.242528	0.850562	0.00772558	0.397173	28	27	33	40	18	30	15	0.225	0.194444	0.111111	0.277778	0	0	0	0	0	0	0	0	0	0	0	0	0	0	0	0
16	3	1	0	1	0	3	0.118466	0.923287	0	1	1	0.646964	0.408841	0.692704	0	0	0.0886958	0.0698663	0.100739	0.412453	0.00738234	1.00218e-22	28	27	33	40	18	30	15	0.225	0.194444	0.111111	0.277778	0	0	0	0	0	0	0	0	0	0	0	0	0	0	0	0
16	3	1	0	1	1	2	0.780728	0.936933	0.680112	0.235682	0.214113	0.729305	0.116917	0.90752	0.352823	0.265364	0.988879	0.461723	0.74709	0.391809	0.294228	1	28	27	33	40	18	30	15	0.225	0.194444	0.111111	0.277778	0	0	0	0	0	0	0	0	0	0	0	0	0	0	0	0
16	3	1	1	0	0	8	0.301645	0.124201	1	0.129275	0.0719475	0.6396	0.298719	0.810811	0.395607	0.652157	1	0.387752	1	0.130515	0.526258	0.778213	28	27	33	40	18	30	15	0.225	0.194444	0.111111	0.277778	0	0	0	0	0	0	0	0	0	0	0	0	0	0	0	0
16	3	1	1	0	1	5	0	0	0.465023	0.540882	0.472899	0	0.112018	0.173309	1	1	0.18937	0.976328	0.406341	0.0631488	0.11204	0.910289	28	27	33	40	18	30	15	0.225	0.194444	0.111111	0.277778	0	0	0	0	0	0	0	0	0	0	0	0	0	0	0	0
16	3	1	1	1	0	3	0.712262	0.394178	0.515694	0.354611	0.286983	0.594668	0.503228	0.660313	0.424874	0.504948	0.045086	0.538019	0	1	0	0.315506	28	27	33	40	18	30	15	0.225	0.194444	0.111111	0.277778	0	0	0	0	0	0	0	0	0	0	0	0	0	0	0	0
16	3	1	1	1	1	1	0.345155	0.403952	0.501095	0.552583	0.410009	1	0	1	0.662714	0.863293	0.139565	1	0.121216	0	1	0.663466	28	27	33	40	18	30	15	0.225	0.194444	0.111111	0.277778	0	0	0	0	0	0	0	0	0	0	0	0	0	0	0	0
16	4	1	0	0	0	7	0	0.70743	0.0699669	0.343627	0.532471	0.559458	0.106842	0.288295	0	0.00441538	0.0167178	0.158861	0.566742	0.522961	0.374807	1.71871e-22	28	27	33	40	18	30	15	0.15	0.138889	0.0555556	0.222222	0.108056	0.0422545	1.22579e-15	0.054337	0.947413	3.78073e-15	0.00982539	2.22824e-15	0.733009	0.140389	0.110135	0.117535	0.909123	0.77855	0.15382	0.0531343
16	4	1	0	0	1	6	0.523549	0.723719	0.550705	0	0.0453922	0.316713	0.226704	1	0.0658897	0.00877912	0.681277	0	0.962749	0.104352	0.0752321	0.795899	28	27	33	40	18	30	15	0.15	0.138889	0.0555556	0.222222	0.831646	0.0938726	0.799755	0.18699	5.46518e-17	0.143475	2.41638e-15	0.0103132	0.917984	0.557558	0.99362	0.580228	0.96727	0.857343	0.16717	0.062356
16	4	1	0	1	0	4	0.557666	0.254126	0.808638	0.238139	0.271169	0.411234	0.475784	0.1847	0.198866	0.26531	0.41028	0.0777483	1	0.696175	0.0930803	1	28	27	33	40	18	30	15	0.15	0.138889	0.0555556	0.222222	0.751614	0.0690985	0.291203	0.093703	0.0279199	0.721043	0.0212983	0.71074	1	1	0.0704935	1	1	1	0.252729	0.462946
16	4	1	0	1	1	2	0.185279	0.740019	0	0.991118	0.662597	0	0.302821	0	0.0888059	0.0591535	0	0.704968	0.820355	0.257828	0	0.33691	28	27	33	40	18	30	15	0.15	0.138889	0.0555556	0.222222	0.436798	1.69997e-16	0.488304	7.85718e-17	0.00844621	0.515589	0.0140535	0.671306	0.961848	4.31157e-16	1	1.07877e-16	0.999079	0.97588	0.252481	0.435658
16	4	1	1	0	0	8	0.352528	0.211426	0.889801	0.480432	0.390714	0.666224	0.145359	0.266886	0.183766	0.244053	0.292729	0.555575	0	0.430138	1	0.145461	28	27	33	40	18	30	15	0.15	0.138889	0.0555556	0.222222	0.965446	0.965886	0.892648	0.971788	0.219095	0.646344	0.0496818	0.11032	0.377506	0.743786	0.307629	0.775124	0.25177	0.690032	0.156758	0.17666
16	4	1	1	0	1	1	1	0	0.843147	0.00528176	0	0.939072	0.128282	0.449261	0.0910084	0	1	0.972283	0.349787	0	0.0405581	0.290908	28	27	33	40	18	30	15	0.15	0.138889	0.0555556	0.222222	3.42246e-17	1	0.467256	1	0.577719	0.165774	0.00623291	0.0546025	1.29866e-17	0.920952	2.5549e-15	0.893324	1.0278e-17	0.011724	1.82182e-14	9.52049e-15
16	4	1	1	1	0	3	0.300446	0.0892791	0.739192	1	1	1	0	0.636017	0.162093	0.159066	0.43885	1	0.0650264	0.152758	0.171592	0.26604	28	27	33	40	18	30	15	0.15	0.138889	0.0555556	0.222222	1	0.866913	1	0.797989	0.582306	1	0.247903	0.80245	0.604324	0.491855	0.857558	0.536135	0.293653	0.785035	0.451231	1
16	4	1	1	1	1	8	0.309987	1	1	0.740276	0.604854	0.721319	1	0.824964	1	1	0.239649	0.863603	0.0277834	1	0.00703272	0.685022	28	27	33	40	18	30	15	0.15	0.138889	0.0555556	0.222222	0.21288	0.85777	0.981229	0.79186	1	0.615793	1	1	0.127906	0.450409	0.569478	0.493307	0.000891923	5.4072e-15	1	0.776291
17	1	0	0	0	0	5	0.826444	0.735878	0.0877589	0.636694	0.360965	0.38314	0	0	0.214998	0.164091	0	0	0.37172	0.488383	0.0570564	0.0702276	28	36	37	43	38	38	17	0.775	0.194444	0.583333	0.416667	0.745216	1.78102e-16	0.636872	0.372308	0.276224	0.559003	0.462047	0.0230131	0.757989	0.708314	0.709684	0.645654	1	0.941251	0.855078	0.673997
17	1	0	0	0	1	3	0.378711	0.653904	0.654093	0.279197	0.173959	1	0.943715	0.850802	0.46328	0.681491	0.533613	0.723704	0.506118	0.122896	0.285943	0.575027	28	36	37	43	38	38	17	0.775	0.194444	0.583333	0.416667	1	0.107547	1	0.524503	0.325262	1	0.61462	0.0435881	1	0.0712848	0.840939	0.014779	0.978251	1	1	0.874258
17	1	0	0	1	0	1	1	1	0	0.207965	0.257303	0	0.249133	0.680999	0	0	0.220559	0.327068	0.473162	0.204214	0.616228	6.24495e-23	28	36	37	43	38	38	17	0.775	0.194444	0.583333	0.416667	0.629635	0	4.05796e-16	5.56825e-17	0.330642	0.668288	0.117635	0.910973	0.522023	1	0.645103	1	0.748168	0.8389	0.342002	1
17	1	0	0	1	1	7	0	0.151635	1	0	0	0.782924	0.886663	0.57955	0.635437	0.497833	1	0.914683	1	0	1	1	28	36	37	43	38	38	17	0.775	0.194444	0.583333	0.416667	0.518943	0.072568	0.914535	0.407195	1	0.293209	0.45609	3.99927e-15	0.496011	0.683666	1	0.674976	0.814239	0.666415	0.690521	0.477259
17	1	0	1	0	0	6	0.0572829	0.737272	0.174058	0.90226	0.661127	0.571783	0.232307	1	0.356411	0.318332	0.176911	0.82211	0.453181	0.277618	0.485095	0.291203	28	36	37	43	38	38	17	0.775	0.194444	0.583333	0.416667	0.135722	0.963005	0.195595	0.951381	7.0213e-17	0.015721	1.91018e-14	0.025452	0.00507286	0.104497	0.00670359	0.0240401	0.096426	0.114656	3.69523e-14	2.22437e-14
17	1	0	1	0	1	4	0.999393	0.581859	0.470124	0.104041	0.021999	0.369486	1	0.630935	0.397597	0.203717	0.434915	0.40377	0.308769	0.710817	0.920418	0.378208	28	36	37	43	38	38	17	0.775	0.194444	0.583333	0.416667	0.192618	0.912353	0.253054	0.934978	0.319824	0.0574858	0.174158	0.0419929	0.0215405	3.93296e-16	0.239685	9.44677e-17	0.0454862	0.0570078	0.201433	0.149165
17	1	0	1	1	0	2	0.360467	0	0.265656	0.706796	1	0.324148	0.699953	0.851484	0.453941	0.276362	0.535882	1	0.201577	1	0.420304	0.456562	28	36	37	43	38	38	17	0.775	0.194444	0.583333	0.416667	9.4782e-18	0.99828	0.330089	0.976534	0.1637	2.29032e-15	1	0.815438	6.70212e-18	0.441967	4.78632e-16	0.30047	0.038115	3.41908e-15	0.319437	0.525189
17	1	0	1	1	1	8	0.695958	0.855058	0.471476	1	0.723771	0.888006	0.409458	0.460814	1	1	0.436505	0.554185	0	0.0548873	0	0.37997	28	36	37	43	38	38	17	0.775	0.194444	0.583333	0.416667	0.267554	1	0.280026	1	0.722142	0.149908	0.563526	1	0.0311316	0.210999	0.168884	0.14804	8.80337e-18	0.0645708	0.236754	0.970452
17	2	0	0	0	0	1	0.68912	0.985204	0.37814	0.578572	0.673096	0	0.440841	0.4595	0	0	0.235318	0.599624	0.54801	0.423548	0	1.32216e-22	28	36	37	43	38	38	17	0.825	0.166667	0.722222	0.388889	1	0.103485	0.216287	0.19055	0.563426	0.508606	0.644461	2.40579e-15	0.898618	0.744081	0.529489	0.753467	1	1	0.739367	0.379471
17	2	0	0	0	1	3	0.515881	1	1	0.383045	0.24197	0.709638	0.761928	0.79203	0.834239	0.506834	0.335475	0.589212	0.557061	0.0790572	0.465913	0.914893	28	36	37	43	38	38	17	0.825	0.166667	0.722222	0.388889	0.974125	0.244349	0.884536	0.43589	0.771726	0.631184	1	0.0173195	1	0.180512	0.490829	0.128896	0.968724	0.965617	1	0.421905
17	2	0	0	1	0	8	1	0.604045	0.933383	0	0	0.528749	0.435324	0	0.168879	0.0918784	0	0	0.395626	0.188279	0.668378	0.140614	28	36	37	43	38	38	17	0.825	0.166667	0.722222	0.388889	0.43244	1.32032e-16	0.187163	5.19535e-17	1.39133e-16	0.289936	0.289444	1	0.59264	0.869869	0.628543	0.892104	0.839892	0.759607	0.429226	1
17	2	0	0	1	1	5	0.620752	0.772074	0.809619	0.0907825	0.331088	0.636994	0.727022	0.515865	0.825703	0.535265	1	0.915256	1	0.0227674	1	1	28	36	37	43	38	38	17	0.825	0.166667	0.722222	0.388889	0.874764	0.115924	1	0.0448496	0.444033	1	0.329652	0.716208	0.794553	1	1	1	0.818219	0.903727	0.487354	0.922044
17	2	0	1	0	0	4	0	0.46898	0	0.942976	0.734894	1	0.593569	0.318179	0.881757	0.673328	0.385291	1	0.418483	0	0.788111	0.366644	28	36	37	43	38	38	17	0.825	0.166667	0.722222	0.388889	0.46177	1	0.311242	0.997698	0.376438	0.260788	0.924909	0.0422123	0.181904	0.512774	0.00738328	0.334571	0.20492	0.331908	0.420992	0.199282
17	2	0	1	0	1	7	0.837716	0	0.39361	0.618258	0.638014	0.803515	1	1	1	1	0.951895	0.593296	0.175223	1	0.770231	0.917111	28	36	37	43	38	38	17	0.825	0.166667	0.722222	0.388889	0.0358474	0.831601	0.0895493	0.825772	0.928005	0.0314048	0.0537993	0.00780129	9.49691e-18	3.27667e-16	0.0778233	7.78599e-17	8.65103e-18	3.65202e-15	0.0424309	1.64737e-14
17	2	0	1	1	0	6	0.456187	0.327138	0.369867	1	1	0.690438	0	0.572412	0.341164	0.414434	0.721937	0.810293	0	0.603964	0.292637	0.0820808	28	36	37	43	38	38	17	0.825	0.166667	0.722222	0.388889	1.68017e-17	0.903103	5.31278e-16	0.901358	1	3.4196e-15	0.437208	0.0280214	0.0215001	0.354792	3.70798e-16	0.276709	0.0557945	0.0343307	0.106198	0.0554537
17	2	0	1	1	1	2	0.515563	0.514355	0.61984	0.666539	0.795915	0.396335	0.356109	0.820783	0.647517	0.308503	0.0381046	0.769307	0.601501	0.032397	0.722356	0.463696	28	36	37	43	38	38	17	0.825	0.166667	0.722222	0.388889	0.0482788	0.968901	0.332905	1	0.986328	0.137684	2.97256e-14	0.0199648	0.00555623	0.386656	0.146343	0.287498	0.0064756	0.0147686	4.25404e-14	0.0374546
17	3	1	0	0	0	7	0.595812	0.433158	0.269823	0	0	0.0385267	0	0.0833151	0.0741516	0.279768	0.0984919	0	0.0295762	1	0.11875	0.115569	28	36	37	43	38	38	17	0.7	0.388889	0.694444	0.444444	1	0.230297	1	0.383456	0.848392	0.381027	0.928298	2.40692e-15	1	0.13788	0.568147	0.217658	1	1	1	0.296149
17	3	1	0	0	1	4	0.406698	0.12727	0.984171	1	1	0.535906	1	0.339507	0.371009	0.35805	0.871729	0.556904	0.635332	0	0.378157	0.688569	28	36	37	43	38	38	17	0.7	0.388889	0.694444	0.444444	0.826826	0.0278095	0.565039	0.0299388	1	1	0.73606	0.0301664	0.833494	1	0.851662	1	0.728599	0.880289	0.479904	0.335553
17	3	1	0	1	0	1	1	1	0.165365	0.477005	0.26714	0.171186	0.291816	0	0.0190545	0.223236	0.334815	0.179449	0.166064	0.297257	1	1.3372e-22	28	36	37	43	38	38	17	0.7	0.388889	0.694444	0.444444	0.79388	1.22682e-16	7.52963e-16	4.98697e-17	0.538449	0.717053	6.6227e-14	0.906643	0.780884	0.97315	0.518617	0.955053	0.727273	0.761604	0.134497	1
17	3	1	0	1	1	5	0	0.394988	1	0.58213	0.447489	0.00808981	0.0959355	0.340988	0	0	0.942817	1	0.0799239	0.857322	0.63388	1	28	36	37	43	38	38	17	0.7	0.388889	0.694444	0.444444	0.262159	0.118388	0.927666	0.189575	0.621877	0.191207	0.794636	0.896392	0.740025	0.833288	1	0.878395	0.866275	0.66018	0.828883	0.928883
17	3	1	1	0	0	6	0.449937	0.356229	0	0.813974	0.349459	0.628236	0.025148	0.582875	0.208229	0.269564	1	0.50585	0.134372	0.867062	0	0.146329	28	36	37	43	38	38	17	0.7	0.388889	0.694444	0.444444	0.0329176	1	0.0055741	0.996962	0.464105	0.0535805	0.926468	0.0228466	0.0265231	0.761625	0.0359596	0.462014	0.0141956	0.0251197	0.0219549	0.0247663
17	3	1	1	0	1	3	0.257966	0.242304	0.293394	0.288268	0.246726	0.18454	0.549657	1	0.407761	0.689532	0	0.683683	0.0799906	0.484423	0.380745	0.759676	28	36	37	43	38	38	17	0.7	0.388889	0.694444	0.444444	1.70821e-17	0.961498	0.507004	1	0.234611	3.27356e-15	0.55591	0.0170768	0.00579658	0.615299	0.225959	0.480606	1.10114e-17	0.0233936	6.96501e-14	1.69732e-14
17	3	1	1	1	0	2	0.352469	0.524784	0.27393	0.927911	0.589866	0	0.626486	0.667663	0.120384	0.37649	0.243006	0.308176	0	0.480708	0.510924	0.439938	28	36	37	43	38	38	17	0.7	0.388889	0.694444	0.444444	0.0880278	0.944371	0.272366	0.965102	0.168761	0.04777	1	0.0420935	0.0555003	0.510714	5.21281e-16	0.394943	0.0128703	5.12279e-15	0.0279371	0.118556
17	3	1	1	1	1	8	0.2742	0	0.921491	0.528095	0.360006	1	0.380475	0.521201	1	1	0.200049	0.937826	1	0.00751745	0.506058	0.514277	28	36	37	43	38	38	17	0.7	0.388889	0.694444	0.444444	0.0609692	0.848958	0.761614	0.81356	9.83604e-17	0.036325	0.785684	1	1.14675e-17	5.26893e-16	0.40005	1.02401e-16	0.00627456	0.000513166	0.165602	0.843434
17	4	1	0	0	0	6	0.589466	1	0.26269	0	0	0	0.219623	0.191141	0	0	0	0.304391	0.133529	0.746262	0.270629	0.113595	28	36	37	43	38	38	17	0.7	0.305556	0.583333	0.361111	1	0.118082	0.354019	0.326314	0.354426	0.77802	0.266098	2.14015e-15	1	0.479163	0.744409	0.529482	1	1	0.774044	0.145012
17	4	1	0	0	1	2	0.95549	0.684861	1	0.673264	0.477815	0.497888	0.250392	0.552029	0.744229	0.365369	0.915737	0	0.51149	1	1	0.453292	28	36	37	43	38	38	17	0.7	0.305556	0.583333	0.361111	0.585612	0.0177756	0.55649	0.190387	0.378998	1	0.465259	0.000581968	0.867443	0.767119	0.952982	0.825769	0.990169	0.978024	1	0.170315
17	4	1	0	1	0	5	1	0.586935	0.275001	0.0463682	0.215226	0.083925	0.502635	1	0.402274	0.335444	0.858624	0.291974	0.720888	0.205739	0.420391	9.46558e-23	28	36	37	43	38	38	17	0.7	0.305556	0.583333	0.361111	0.309395	0	6.51839e-16	4.90859e-17	0.256995	0.938257	4.32252e-14	0.865106	0.717422	0.898402	0.895899	0.974881	0.93724	0.916778	0.270585	0.636831
17	4	1	0	1	1	1	0.747621	0.820907	0.925434	0.215969	0.200619	0.50945	0	0.87111	0.747824	0.180393	0.537051	0.309287	0.573156	0	0.491517	0.489979	28	36	37	43	38	38	17	0.7	0.305556	0.583333	0.361111	0.148869	1.38759e-16	1	0.0561879	0.158741	0.0324169	0.215526	0.834001	0.645975	1	1	1	0.93334	0.818155	0.592179	0.594428
17	4	1	1	0	0	4	0.423972	0.92862	0	0.817334	0.880748	0.334887	0.170279	0.4785	1	1	0.629215	0.788363	0.774485	0.644687	0	0.10077	28	36	37	43	38	38	17	0.7	0.305556	0.583333	0.361111	0.138851	1	0.132166	0.995956	0.368791	0.0584062	0.55658	0.0157448	0.0193917	0.583955	4.86744e-16	0.401828	0.120023	0.175421	0.0287057	0.0248733
17	4	1	1	0	1	8	0	0.569026	0.610336	0.446695	0.38316	1	0.396064	0.127087	0.712701	0.434675	0.0421466	0.0169928	0	0.665116	0.647921	0.345462	28	36	37	43	38	38	17	0.7	0.305556	0.583333	0.361111	0.0889119	0.857026	0.780008	0.860494	7.19812e-17	9.49905e-15	0.308247	0.0151137	1.3048e-17	4.29406e-16	0.592456	1.04001e-16	0.108607	0.139263	9.1118e-14	1.17503e-14
17	4	1	1	1	0	3	0.662011	0.415084	0.451697	0.467676	0.325462	0.261923	0.291911	0.262803	0.85615	0.379263	1	0.654658	0.756546	0.882992	0.323983	0.130714	28	36	37	43	38	38	17	0.7	0.305556	0.583333	0.361111	1.56406e-17	0.987622	0.545768	1	0.363098	0.107091	0.729439	0.470105	0.0306992	0.537251	0.30547	0.419352	0.102037	0.0903676	0.159915	0.338097
17	4	1	1	1	1	7	0.193044	0	0.832599	1	1	0.746438	1	0	0.326454	0.0568536	0.308653	1	1	0.10138	0.0874928	1	28	36	37	43	38	38	17	0.7	0.305556	0.583333	0.361111	0.100226	0.905341	0.508332	0.93875	1	0.375261	1	1	0.00679444	0.153613	0.558024	0.17346	1.15132e-17	5.81922e-15	0.373919	1
18	2	0	0	0	0	3	1	0.415127	0.669685	0.221489	0.233513	1	0.511048	1	0.716551	0.776525	0.63595	0.262711	0.72069	0.808509	0.233275	0.0706476	48	44	32	46	46	45	15	0.7	0.277778	0.333333	0.583333	0.289943	0.099726	0.562475	0.186618	0.664482	0.389603	0.728658	0.43488	0.666826	0.767495	0.27749	0.660574	0.893266	0.747565	0.714134	0.759243
18	2	0	0	0	1	2	0.0919704	0.297866	1	0.705147	1	0	0.732037	0.392031	1	1	1	0.266365	0.720089	0.774343	0.584889	1	48	44	32	46	46	45	15	0.7	0.277778	0.333333	0.583333	0.176745	0.137082	0.843236	0.233346	1	0.330855	0.865026	3.4432e-14	0.710971	0.650782	0.625068	0.652524	0.943807	0.72268	0.941639	0.868158
18	2	0	0	1	0	8	0	0.441919	0.387862	0.510003	0.528325	0.321477	0.733017	0.302326	0.183093	0.129908	0.1468	0.262314	0.605011	1	0.480574	0.0317003	48	44	32	46	46	45	15	0.7	0.277778	0.333333	0.583333	0.26157	0.867407	0.768942	0.797763	0.350726	0.302243	0.718685	1	0.0996799	0.49099	0.258776	0.317119	0.116504	0.227651	0.187077	0.344204
18	2	0	0	1	1	6	0.683828	0	0.727911	1	0.985266	0.310152	0.128713	0.35519	0.208278	0.0677478	0.230386	0	1	0.493222	0.99651	0.773549	48	44	32	46	46	45	15	0.7	0.277778	0.333333	0.583333	0.0480349	0.692518	0.661073	0.60878	1.193e-16	0.0340368	0.254152	0.224093	0.0466551	3.40257e-16	0.189265	7.37474e-17	0.0982973	0.100871	0.155886	0.239058
18	2	0	1	0	0	2	0.145547	0.784766	0.0722024	0.837551	0.463136	0.228228	0.406397	0.129843	0	0	0.878003	0.00198297	0.27926	0.481696	0.00551372	8.28596e-23	48	44	32	46	46	45	15	0.7	0.277778	0.333333	0.583333	1	0.169073	0.869352	0.283687	0.831469	1	1	0.445018	1	0.489773	0.379595	0.420417	1	1	1	1
18	2	0	1	0	1	5	0.92383	0.290861	0.568967	0.825378	0.829571	0.504162	0.0453955	0.376288	0.623513	0.612719	0	0.208805	0.151194	0.482099	0	0.332996	48	44	32	46	46	45	15	0.7	0.277778	0.333333	0.583333	0.405702	1.20499e-16	1	4.49085e-17	0.813862	0.817068	0.430265	0.295805	0.635176	1	1	1	0.763432	0.683362	0.425863	0.719538
18	2	0	1	1	0	1	0.900823	1	0	0.937614	0.85295	0.619023	1	0	0.391717	0.478169	0.874031	0.386098	0	0.81463	0.39512	0.107385	48	44	32	46	46	45	15	0.7	0.277778	0.333333	0.583333	1.22037e-17	1	0.0149643	1	0.268987	0.0302448	3.32658e-14	0.141637	9.1625e-18	0.968601	0.022695	0.742123	8.65226e-18	0.0178955	0.00207306	2.94767e-14
18	2	0	1	1	1	4	0.968782	0.102632	0.876968	0	0	0.370984	0	0.629318	0.400265	0.635347	0.971811	1	0.336683	0	1	0.431943	48	44	32	46	46	45	15	0.7	0.277778	0.333333	0.583333	0.0184265	0.994649	9.33519e-16	0.989915	0.266566	3.51489e-15	0.108833	0.161542	0.0121963	0.969223	3.93181e-16	0.733033	0.00249885	3.04943e-15	3.77974e-14	0.00529379
18	3	0	0	0	0	8	0.555462	0	0.891798	0.526537	1	0.644418	0.961093	0.804967	0.331079	0.248831	0	0.502234	0.652624	0.579984	0	9.22184e-23	48	44	32	46	46	45	15	0.65	0.0833333	0.472222	0.333333	0.428067	0.116284	1	0.218753	0.353587	0.376371	0.357749	0.00422294	0.603482	0.654505	1	0.671233	0.80182	0.643065	0.521107	0.325071
18	3	0	0	0	1	3	0.0337567	0.642327	0.622907	0.210538	0.347849	0.654079	0	0.629081	0.0724203	0	0.344373	0.279216	1	0.56511	0.221605	1	48	44	32	46	46	45	15	0.65	0.0833333	0.472222	0.333333	0.0557584	0.928675	0.260837	0.864932	0.485658	0.164285	0.0748807	0.467757	0.071378	0.420917	0.0599891	0.270276	0.034111	0.0870339	0.128408	0.383187
18	3	0	0	1	0	7	0.420329	0.656193	0.187701	0.0408083	0.0941309	1	0.725338	0.663419	0.0421099	0.00103512	0.191725	0.519344	0.698801	1	0.128832	0.148132	48	44	32	46	46	45	15	0.65	0.0833333	0.472222	0.333333	0.780002	0.105361	0.584299	0.149132	0.43499	0.340726	0.718261	0.00399093	0.793456	0.654555	0.735295	0.659926	0.90814	0.783469	0.839113	0.360012
18	3	0	0	1	1	3	0.682945	0.466483	0.297582	0	0.282932	0.0496902	0.0673877	0.892359	0	0.0104165	1	1	0.823479	0	1	0.734693	48	44	32	46	46	45	15	0.65	0.0833333	0.472222	0.333333	0.277088	1.93078e-16	0.569354	9.58975e-17	0.457847	0.185235	0.877597	0.911841	0.719061	4.83193e-16	0.561208	1.22279e-16	1	0.809018	1	0.690647
18	3	0	1	0	0	7	1	1	0.0148545	1	0.776054	0.984187	1	0	0.0832398	0.177753	0.33854	0.73759	0.0176967	0.551184	0.130406	0.194392	48	44	32	46	46	45	15	0.65	0.0833333	0.472222	0.333333	0.130017	0.986068	0.247411	1	0.185382	1.85854e-15	3.42772e-14	3.72657e-15	0.0117843	0.582695	0.231336	0.511108	0.0271102	0.0494402	4.15662e-14	1.48235e-14
18	3	0	1	0	1	1	0.637282	0.364672	0	0.179289	0.372242	0	0.0529311	0.974465	0.116872	0.239236	0.503748	0.451504	0.379085	0.595807	0.668391	0.352778	48	44	32	46	46	45	15	0.65	0.0833333	0.472222	0.333333	1.0145e-17	0.890236	0.422798	0.826963	6.09075e-17	0.00102548	0.140204	0.0230601	7.40869e-18	0.39767	0.352611	0.325277	0.00199303	3.49356e-15	0.0399481	0.0595604
18	3	0	1	1	0	5	0.634683	0.994352	0.380463	0.0616855	0	0.75433	0.338019	0.559176	0.102976	0.175483	0.224767	0	0	0.409107	0.152218	0.166821	48	44	32	46	46	45	15	0.65	0.0833333	0.472222	0.333333	0.42956	1	7.42087e-16	0.940209	0.659925	0.0901824	0.0820204	0.0247188	0.100352	0.583182	6.81077e-16	0.40548	9.20852e-18	0.101067	0.0943104	0.0735078
18	3	0	1	1	1	6	0	0.138413	1	0.324378	0.452457	0.979612	0.239009	1	1	1	0.371574	0.97639	0.340305	0.990976	0.300639	0.270707	48	44	32	46	46	45	15	0.65	0.0833333	0.472222	0.333333	1	0.0829876	0.590834	0.0813009	1	1	1	1	1	1	0.817436	1	0.877956	1	0.997899	1
18	1	1	0	0	0	2	0.969772	1	0.334569	1	1	0.803485	0.895637	0.874595	0	0	0.097471	0.184463	0.840657	0.534852	0.0244858	8.2669e-23	48	44	32	46	46	45	15	0.875	0	0.527778	0.305556	0.596498	0.978643	2.46564e-15	0.904765	0.728214	0.347789	0.0115369	0.0944525	0.150316	0.984398	0.303174	0.8696	0.0159335	0.266695	0.00793627	0.175889
18	1	1	0	0	1	8	0.0156793	0.29757	0.216868	0.820467	0.893987	0.807187	0.772259	0.368671	1	0.701871	0.0596587	1	0.799024	0.874675	0.00289193	1	48	44	32	46	46	45	15	0.875	0	0.527778	0.305556	0.615993	0.149018	1	0.178581	1	1	1	1	0.88968	0.462213	0.519049	0.471317	0.915508	1	1	1
18	1	1	0	1	0	4	0.633712	0.881886	0.455045	0.357314	0.436637	1	0.808756	0.582243	0.213247	0.294948	0.0168822	0.234684	0.759331	0.667968	0.0555737	0.0315004	48	44	32	46	46	45	15	0.875	0	0.527778	0.305556	0.286251	0.970483	0.674449	1	0.474122	3.5452e-15	0.0186878	0.109888	9.69793e-18	0.919543	0.57796	1	1.08594e-17	5.42059e-15	0.0144734	0.154385
18	1	1	0	1	1	6	0.224682	0.581881	0	0.0666465	0.378709	0.637182	0.43799	0.155955	0.417624	0.242076	0.101952	0.371315	1	0.614547	0.0459789	0.32371	48	44	32	46	46	45	15	0.875	0	0.527778	0.305556	0.89585	0.924565	0.536303	0.852998	0.575252	0.447476	0.00856155	0.0134278	0.369801	0.771021	0.131695	0.701317	0.144021	0.709916	0.0127033	0.0353256
18	1	1	1	0	0	2	0.608483	0.583651	1	0	0	0.87607	0.679731	0.66243	0.972686	0.501899	1	0.239283	0	0.569983	0.00807804	0.173006	48	44	32	46	46	45	15	0.875	0	0.527778	0.305556	0.299006	1	0.100802	0.971915	0.448574	0.182597	0.000746124	0.00350034	0.0769366	1	1.41444e-15	0.938304	0.0896464	0.304709	3.88606e-15	0.00365221
18	1	1	1	0	1	8	0	0.38147	0.873642	0.134788	0.3455	0.216139	1	1	0.818204	1	0.0411112	0.266556	0.768071	0.000971767	1	0.22483	48	44	32	46	46	45	15	0.875	0	0.527778	0.305556	1	0.0584523	0.988513	0.117537	5.24357e-17	0.206524	0.00180244	0.00168289	1	0.265952	1	0.341263	1	0.841515	0.0403795	3.31445e-15
18	1	1	1	1	0	4	1	0.690932	0.487792	0.370655	0.548779	0.768773	0.854167	0	0.450807	0.521014	0.0713293	0	0.295732	1	0	0.162616	48	44	32	46	46	45	15	0.875	0	0.527778	0.305556	1.30715e-17	1.57e-16	0.824618	7.1764e-17	0.110113	0.125337	4.13854e-16	0.0751272	0.535493	3.92996e-16	0.70458	1.16029e-16	0.88143	0.439481	0.0356268	0.0654234
18	1	1	1	1	1	1	0.287075	0	0.807742	0.244053	0.371123	0	0	0.79947	0.204211	0.0573537	0	0.506477	0.129769	0	0.14869	0.222995	48	44	32	46	46	45	15	0.875	0	0.527778	0.305556	0.891012	0.0727722	0.929402	0.134944	0.0338459	0.529568	0.0016528	3.42841e-16	0.916205	0.276118	0.615539	0.202242	0.947185	0.879333	0.0434452	0.009434
18	4	1	0	0	0	5	0.0991472	1	0.697231	0.376907	0.262481	0.483909	0.627033	0	0.26713	0.237997	0.513846	0.253371	0.541311	0.465708	0.235381	1.25268e-22	48	44	32	46	46	45	15	0.5	0.166667	0.222222	0.555556	1	0.114685	0.203579	0.202895	0.895125	0.77494	0.0307762	2.67035e-15	1	0.440836	0.368471	0.479116	1	1	0.280195	0.331257
18	4	1	0	0	1	3	0.682548	0	0	1	1	0	0.609425	0.291075	0	0	0.490178	1	1	0.351647	0.335538	0.742743	48	44	32	46	46	45	15	0.5	0.166667	0.222222	0.555556	0.313097	1.51408e-16	1	6.70309e-17	1	0.676266	0.0343566	0.0477342	0.57795	1	1	1	0.851928	0.812408	0.234641	0.296017
18	4	1	0	1	0	7	0	0.551699	0.343473	0	0	0.518809	0.754938	0.940085	0.238279	0.207954	0	0.435391	0.795944	0.406007	0.223116	0.100768	48	44	32	46	46	45	15	0.5	0.166667	0.222222	0.555556	0.214818	0.062924	0.249554	0.116695	0.933581	1	1	1	0.655605	2.99886e-16	0.150193	6.81761e-17	0.931306	0.946234	1	1
18	4	1	0	1	1	1	0.0996574	0.411534	0.801377	0.246492	0.200417	0.229733	0	0.551296	0.262176	0.351545	0.521487	0.24879	0.801132	0.0808513	0.463572	1	48	44	32	46	46	45	15	0.5	0.166667	0.222222	0.555556	0.105399	0.121015	0.493283	0.145511	0.591345	0.890522	0.051095	0.728162	0.486698	0.613886	0.804621	0.683295	0.708002	0.661899	0.144025	0.654775
18	4	1	1	0	0	4	1	0.553467	0.472108	0.612522	0.265844	0.82832	1	0.846376	0.850062	0.905644	0.887539	0	0.280177	0	1	0.157111	48	44	32	46	46	45	15	0.5	0.166667	0.222222	0.555556	0.156652	0.990414	8.1271e-16	0.962853	0.637147	0.467535	0.0388803	0.0267796	0.180831	0.664165	0.0560032	0.493237	0.224166	0.395278	0.135053	0.276971
18	4	1	1	0	1	5	0.465862	0.294018	1	0.452184	0.58036	0.370365	0.535819	0.0207696	0.835335	0.863955	0.761128	0.417208	0.360618	0.634409	0.0635903	0.43435	48	44	32	46	46	45	15	0.5	0.166667	0.222222	0.555556	0.0789239	0.939346	0.0961665	0.988191	0.58991	0.0675113	0.00484767	0.00438536	9.6502e-18	0.547322	0.11118	0.484504	1.05747e-17	4.43019e-15	0.0348659	1.51743e-14
18	4	1	1	1	0	8	0.976396	0.878621	0.924083	0.326028	0.403516	1	0.481197	1	1	1	0.862236	0.144994	0	0.692752	0	0.13706	48	44	32	46	46	45	15	0.5	0.166667	0.222222	0.555556	0.209499	1	0.129002	1	0.580264	0.359788	0.024221	0.0417128	0.118141	0.682816	4.51077e-16	0.531755	0.13599	0.226003	0.0742366	0.202203
18	4	1	1	1	1	2	0.151953	0.0782211	0.537443	0.259738	0.297286	0.389737	0.396784	0.938128	0.6213	0.795178	1	0.695129	0.352545	1	0.471601	0.512716	48	44	32	46	46	45	15	0.5	0.166667	0.222222	0.555556	1.23729e-17	0.83238	0.447742	0.851825	6.35061e-17	3.27892e-15	2.52395e-15	0.012859	0.0243524	0.360443	0.461662	0.395697	0.0917539	0.0199213	1.67987e-14	0.0291118
19	1	0	0	0	0	8	0.43105	0.21584	0.451366	0.539038	0.425232	0.979279	0.881685	0.398948	0.65647	0.509082	0.243802	0.709902	0.693966	0.496826	0	0.221571	25	43	28	24	44	17	22	0.45	0.25	0.277778	0.333333	1	0.229409	1	0.360818	1	0.875674	0.522158	0.0842562	1	6.20125e-16	0.46533	1.26428e-16	1	1	1	1
19	1	0	0	0	1	4	0.572477	0.588963	0.291345	0.400715	0.377785	0.588483	0	0.44028	0.666728	0.765091	0.499283	0.439766	0.793354	0.00199183	0.404508	0.661781	25	43	28	24	44	17	22	0.45	0.25	0.277778	0.333333	0.691497	0.0263596	0.343891	0.00474406	0.804363	0.687137	0.180979	0.0441023	0.752346	1	0.594589	0.884752	0.878768	0.901227	0.534354	0.63158
19	1	0	0	1	0	1	1	1	0	1	1	0.383999	0.298779	0.193032	0.0292949	0	0	1	0.588802	0.140902	0.00549484	2.30001e-22	25	43	28	24	44	17	22	0.45	0.25	0.277778	0.333333	0.483172	1.21099e-16	0.157399	4.48433e-17	0.616945	0.543291	3.19996e-14	0.10802	0.709402	0.978204	1	1	0.859683	0.864699	0.459079	0.652202
19	1	0	0	1	1	5	0	0.373203	0.998495	0	0	0.266772	1	0	1	1	0.610023	0.197264	1	0	0.456093	1	25	43	28	24	44	17	22	0.45	0.25	0.277778	0.333333	0.854155	0	0.327254	0.0120583	0.936536	1	0.427778	0.154261	0.817686	0.969592	0.658347	0.894531	0.895282	0.986436	0.740608	0.834837
19	1	0	1	0	0	3	0.465019	0	0.18127	0.920944	0.770577	0	0.962599	0.68731	0	0.374768	1	0.207909	0.563278	0.420219	1	0.235134	25	43	28	24	44	17	22	0.45	0.25	0.277778	0.333333	3.45363e-17	0.931441	1.0669e-15	0.932204	1.01322e-16	4.88128e-15	0.0703394	1.86041e-14	1.30116e-17	0.976688	4.53232e-16	0.654413	9.97464e-18	4.35611e-15	5.26086e-14	3.49197e-14
19	1	0	1	0	1	7	0.118235	0.596037	0.672415	0.168371	0.191888	0.877368	0.537961	1	0.502989	0.521001	0.679099	0	0.476256	1	0.241416	0.406448	25	43	28	24	44	17	22	0.45	0.25	0.277778	0.333333	0.361005	0.867031	0.599655	0.823137	0.129174	0.270387	0.254396	0.203334	0.0995848	0.167045	0.0560351	0.0838275	0.0980634	0.195614	0.269907	0.32173
19	1	0	1	1	0	1	0.455138	0.698653	0.316466	0.509458	0.362869	0.966959	0.448585	0.547139	0.449605	0.547433	0.646637	0.144495	0.287215	0.128452	0.0882826	0.311791	25	43	28	24	44	17	22	0.45	0.25	0.277778	0.333333	0.353505	1	0.704894	1	0.896036	0.295366	0.261111	0.387506	0.094268	0.680213	0.219934	0.499123	0.0159257	0.100942	0.273992	0.393386
19	1	0	1	1	1	4	0.444989	0.760339	1	0.194982	0.210004	1	0.500707	0.655491	0.648359	0.676012	0.869913	0.143644	0	0.21588	0.717344	0.572975	25	43	28	24	44	17	22	0.45	0.25	0.277778	0.333333	0.505222	0.870395	0.625291	0.813292	0.618032	0.669552	1	1	0.170857	0.233036	0.0527448	0.0933205	0.112853	0.232098	0.458897	0.663187
19	4	0	0	0	0	5	0.651563	0.417773	0.0887157	0.661708	0.747199	0.469188	0.354043	0.43245	0.0296278	0.0121085	0.348838	0.700946	0.943375	0	0.105461	0.00976594	25	43	28	24	44	17	22	0.7	0.361111	0.277778	0.722222	1	0.207078	0.33257	0.44015	0.362784	0.549929	0.40448	5.06584e-15	0.966292	0.360576	0.368284	0.357889	0.926769	0.895531	0.55134	0.369765
19	4	0	0	0	1	8	0.14766	0.893007	0.923751	0	0	0.982829	0.372554	0.815776	0.331834	0.513051	0.590222	0.633284	1	0.132821	0.40129	0.873841	25	43	28	24	44	17	22	0.7	0.361111	0.277778	0.722222	0.670426	0	8.61391e-16	5.59442e-17	0.090801	0.473156	0.510296	0.0133039	0.775375	0.942681	0.741174	0.955612	0.852516	0.89242	0.475731	0.260576
19	4	0	0	1	0	2	0.896287	0.645522	0.395392	0.242229	0.338704	1	0.573023	0.331702	0	0	0.183028	0.328029	0.818758	0.597184	0.213055	1.00578e-22	25	43	28	24	44	17	22	0.7	0.361111	0.277778	0.722222	0.463203	0.211722	0.493908	0.439272	0.427094	0.47156	1	1	1	0.260568	0.3739	0.254701	1	1	1	1
19	4	0	0	1	1	6	0.0910028	0.0516746	1	0.286073	0.347537	0.579333	1	1	0.734599	0.78217	0.715005	0.207106	0.815307	0.530893	0.435176	1	25	43	28	24	44	17	22	0.7	0.361111	0.277778	0.722222	4.55311e-17	0.904002	0.151458	0.877854	9.69947e-17	5.30333e-15	5.29108e-14	0.031525	1.5074e-17	0.153651	0.0219633	0.139833	1.03877e-17	4.73937e-15	5.43047e-14	2.94376e-14
19	4	0	1	0	0	7	0.56341	0.433463	0	1	1	0.621699	0.722623	0.843217	0.148957	0.249507	0.486896	1	0	0.466035	0	0.0139173	25	43	28	24	44	17	22	0.7	0.361111	0.277778	0.722222	0.8143	1.56102e-16	1	0.0624813	0.167767	1	0.45468	0.895906	0.769225	1	1	1	0.784253	0.873249	0.434694	0.768352
19	4	0	1	0	1	3	1	0	0.829478	0.196724	0.376917	0	0.454647	0.631813	0.700338	0.742192	1	0	0.781329	0.617591	1	0.367943	25	43	28	24	44	17	22	0.7	0.361111	0.277778	0.722222	0.212831	0.966686	0.336935	0.943211	0.181065	0.229814	0.376442	0.0604008	0.038639	0.23225	0.0898145	0.194869	0.020844	0.126791	0.115773	0.0237061
19	4	0	1	1	0	8	0.935354	0.387959	0.195624	0.5277	0.542638	0.237909	0.523532	0	0.273443	0.132887	0.636117	0.579717	0.607276	1	0.214815	0.0311658	25	43	28	24	44	17	22	0.7	0.361111	0.277778	0.722222	0.653748	1	0.273524	1	1	0.770444	0.71351	0.350976	0.176445	0.301742	0.0961444	0.282899	0.0144865	0.180295	0.25137	0.462843
19	4	0	1	1	1	2	0	1	0.783728	0.189199	0.284144	0.563299	0	0.293078	1	1	0	0.835847	0.815736	0.0638967	0.439857	0.347125	25	43	28	24	44	17	22	0.7	0.361111	0.277778	0.722222	0.159083	0.841588	0.010841	0.793532	0.228575	0.208248	0.331796	0.0468029	0.0407769	3.08905e-16	5.63312e-16	7.33545e-17	0.0329028	0.101969	0.145153	0.0689931
19	2	1	0	0	0	4	0.722778	0.464254	0.141954	0.208102	0.0999572	0.644445	0.345168	0.23582	0.208813	0.0883492	0	0.843639	0.725907	0	0.204189	0.0159993	25	43	28	24	44	17	22	0.45	0.277778	0.222222	0.638889	0.0506538	0	0.10838	5.09298e-17	0.210521	0.587923	0.597931	0.632157	0.599828	1	1	1	0.852741	0.880758	0.488504	0.358315
19	2	1	0	0	1	7	0	0.792853	0.654859	0.241156	0.326757	1	0.102151	0.0248513	1	0.587744	0.659957	0.306205	0.894223	0.0288218	1	1	25	43	28	24	44	17	22	0.45	0.277778	0.222222	0.638889	0.17454	0.896107	0.0719679	0.915776	1	0.164642	0.0104036	0.0165966	0.0216606	0.401304	0.396916	0.436168	0.00611142	0.0542079	0.0521438	0.0498174
19	2	1	0	1	0	5	0.553761	1	0	1	1	0.697462	1	0.369456	0.400864	0.549282	0.149379	1	0.389331	0.786893	0.110116	0.0597282	25	43	28	24	44	17	22	0.45	0.277778	0.222222	0.638889	0.806157	1.69492e-16	0.159399	0.343429	0.497362	1	0.00139151	0.0422432	0.884787	3.04378e-16	0.339819	6.56622e-17	0.904937	1	0.204674	0.234539
19	2	1	0	1	1	3	0.0156587	0	1	0	0	0.0145727	0.211425	0	0.595718	1	1	0.89183	1	0.430782	0.220798	0.614343	25	43	28	24	44	17	22	0.45	0.277778	0.222222	0.638889	0.137289	1	0.147015	1	0.834109	0.106232	0.443128	0.87073	0.0128051	0.637243	0.307953	0.596649	1.04353e-17	0.0588405	0.564031	1
19	2	1	1	0	0	1	1	0.230458	0.138723	0.711918	0.279994	0	0.25256	1	0	0	0.639058	0	0.0540916	0.800588	0.021651	0.038058	25	43	28	24	44	17	22	0.45	0.277778	0.222222	0.638889	0.309783	0	0.139565	0.00235783	0.607955	0.891475	1	1	0.538908	1	0.724401	0.960279	0.677251	0.813668	1	0.915522
19	2	1	1	0	1	6	0.314805	0.629357	0.514077	0.0626652	0.100092	0.375983	0	0.648032	0.934634	0.86819	0.380336	0.430211	0	0.733067	0	0.400348	25	43	28	24	44	17	22	0.45	0.277778	0.222222	0.638889	1	0.0444051	1	0.393054	0.92543	0.214889	0.0170108	0.978533	1	0.178777	0.796413	0.193343	1	0.956945	0.319083	0.976198
19	2	1	1	1	0	4	0.709518	0.597588	0.135884	0.836595	0.522698	0.377663	0.187913	0.244472	0.185338	0.394086	0.417639	0.384588	0.294132	0.630236	0.323173	1.48223e-22	25	43	28	24	44	17	22	0.45	0.277778	0.222222	0.638889	0.139538	0.982059	6.803e-16	0.964585	0.737082	0.0441244	2.50567e-15	2.64018e-15	0.0177166	0.58444	5.42879e-16	0.524513	0.00297965	5.06388e-15	0.0211448	0.0238389
19	2	1	1	1	1	5	0.764271	0.201599	0.770596	0.330849	0.0278244	0.320024	0.165146	0.197438	0.717555	0.894475	0.802415	0.433596	0.164452	1	0.0748605	0.435104	25	43	28	24	44	17	22	0.45	0.277778	0.222222	0.638889	3.20239e-17	0.98182	0.0437645	0.99476	9.77856e-17	3.50205e-15	0.0551364	0.0517139	1.36247e-17	0.53933	0.253068	0.527899	0.117953	0.102222	2.18714e-14	1.66967e-14
19	3	1	0	0	0	8	0.201916	0.542078	0.0934192	1	1	0.544561	0.327113	0.249382	0.0264679	0	0	0.492232	0.589938	0.458786	0.402703	1.50999e-22	25	43	28	24	44	17	22	0.275	0.472222	0.333333	0.388889	1	1.1704e-16	0.29934	4.48016e-17	0.816843	1	1	1	0.76629	0.980553	0.935446	0.995173	0.804415	1	1	1
19	3	1	0	0	1	1	0.72092	1	0.705401	0.156232	0.181987	1	0	0.685671	1	1	0.83054	0.854214	1	0.196594	0.493454	0.569014	25	43	28	24	44	17	22	0.275	0.472222	0.333333	0.388889	0.697984	0.201876	0.47253	0.30515	0.379904	0.20223	0.00434515	1.43339e-15	1	2.98632e-16	0.297437	7.29722e-17	1	0.981503	0.171304	0.0941462
19	3	1	0	1	0	3	1	0.51032	0	0.488977	0.499601	0.966223	0.606308	0.260821	0	0.0436495	0.223573	0.246134	0.710388	0.171108	0.093825	0.00868746	25	43	28	24	44	17	22	0.275	0.472222	0.333333	0.388889	0.617496	1	0.753847	1	0.0394042	0.223234	0.0236705	0.0366308	0.108701	0.933182	0.142945	0.777613	0.126943	0.241069	0.0558098	0.0483186
19	3	1	0	1	1	7	0.588774	0.446077	0.894493	0.174077	0.214452	0.162437	0.924844	0.261771	0.0947422	0.101174	0.95859	0.77578	0.694173	0.0396978	1	1	25	43	28	24	44	17	22	0.275	0.472222	0.333333	0.388889	0.297106	0.840828	0.544339	0.829972	1	0.255171	0.164929	0.562858	0.014395	0.446125	0.224593	0.394618	1.07116e-17	0.00521339	0.0778676	0.416369
19	3	1	1	0	0	6	0.481223	0.190434	0.312448	0.474189	0.488983	0.446501	0.781633	0	0.223596	0.423201	0.310877	0.63804	0.130363	0.950887	0.0153922	0.140754	25	43	28	24	44	17	22	0.275	0.472222	0.333333	0.388889	6.27967e-17	0.0242176	0.723259	0.0118284	0.263638	0.464217	0.160807	0.117651	0.538264	0.991418	0.807275	0.973685	0.708343	0.755161	0.0631831	0.043314
19	3	1	1	0	1	2	0	0.665992	1	0.045064	0.0197138	0.926169	0.317198	1	0.739763	0.854737	1	1	0	1	0	0.470865	25	43	28	24	44	17	22	0.275	0.472222	0.333333	0.388889	0.530581	0.0375666	1	0.0214232	1.23327e-16	0.177779	2.19569e-15	0.00515893	0.753312	1	1	1	0.889827	0.903942	0.112872	0.0465371
19	3	1	1	1	0	8	0.372099	0.105975	0.371946	0.864772	0.759577	0.502514	1	0.557572	0.269768	0.740303	0.132033	0	0.0132278	0.375279	0.0460053	0.0964326	25	43	28	24	44	17	22	0.275	0.472222	0.333333	0.388889	0.410313	0.864956	0.179071	0.839234	0.889669	0.235152	0.0263264	0.551248	0.0828119	0.523458	0.00138411	0.441351	0.0177158	0.0562631	0.0554474	0.472841
19	3	1	1	1	1	4	0.23256	0	0.764065	0	0	0	0.743021	0.464205	0.163769	0.185566	0.568822	0.529613	0.53603	0	0.0240298	0.804785	25	43	28	24	44	17	22	0.275	0.472222	0.333333	0.388889	0.191322	0.869222	1.2872e-15	0.848767	0.431157	5.22269e-15	0.00371717	0.0442888	1.48972e-17	0.530057	6.05839e-16	0.462852	0.0104504	5.75105e-15	1.65065e-14	7.19575e-15
20	2	0	0	0	0	6	0.920454	0.745289	0.0881121	0	0	0.0303811	0.528645	0.77205	0.551079	0.51134	0.0090286	0.429797	0.198957	0.382673	0.0871576	3.46433e-22	31	36	35	35	40	37	20	0.5	0.444444	0.5	0.555556	0	0	0	0	0	0	0	0	0	0	0	0	0	0	0	0
20	2	0	0	0	1	4	0.039553	0	0.714131	0.384065	0.415612	0.984201	0	0	1	0.659065	0.372948	0.6061	0.821881	0	1	0.41694	31	36	35	35	40	37	20	0.5	0.444444	0.5	0.555556	0	0	0	0	0	0	0	0	0	0	0	0	0	0	0	0
20	2	0	0	1	0	5	0.60378	1	0	0.571448	0.460609	0.104436	0.00258369	0.289734	0	0	0	1	1	0.132164	0.359402	0.0347662	31	36	35	35	40	37	20	0.5	0.444444	0.5	0.555556	0	0	0	0	0	0	0	0	0	0	0	0	0	0	0	0
20	2	0	0	1	1	8	0.657178	0.528551	0.573917	0.55474	0.596645	0.01925	0.330481	0.979275	0.0895706	0.100465	0.472929	0.312789	0.76458	0.154252	0.266744	0.240274	31	36	35	35	40	37	20	0.5	0.444444	0.5	0.555556	0	0	0	0	0	0	0	0	0	0	0	0	0	0	0	0
20	2	0	1	0	0	1	1	0.345542	0.264532	1	1	0.603673	1	0.561899	0.662006	0.848569	1	0.824542	0.0908116	1	0.507174	0.479215	31	36	35	35	40	37	20	0.5	0.444444	0.5	0.555556	0	0	0	0	0	0	0	0	0	0	0	0	0	0	0	0
20	2	0	1	0	1	3	0.821125	0.196902	0.735805	0.582984	0.356006	0.819453	0.433557	1	0.783911	0.916771	0.959761	0.458706	0	0.290626	0	0.78926	31	36	35	35	40	37	20	0.5	0.444444	0.5	0.555556	0	0	0	0	0	0	0	0	0	0	0	0	0	0	0	0
20	2	0	1	1	0	7	0.617195	0.692469	0.465404	0.685536	0.411968	0	0.399182	0.771434	0.103943	0.259726	0.770048	0.295455	0.00999779	0.358543	0.0621	1	31	36	35	35	40	37	20	0.5	0.444444	0.5	0.555556	0	0	0	0	0	0	0	0	0	0	0	0	0	0	0	0
20	2	0	1	1	1	6	0	0.274221	1	0.910603	0.935587	1	0.00579971	0.627833	0.942836	1	0.916246	0	0.637928	0.397218	0.0273662	0.532964	31	36	35	35	40	37	20	0.5	0.444444	0.5	0.555556	0	0	0	0	0	0	0	0	0	0	0	0	0	0	0	0
20	4	0	0	0	0	2	0.697475	0.547893	0.555365	0.455381	0.278118	0.617995	0.323333	0.379569	0	0	0	0.920516	0.995147	0	0.482225	0.127029	31	36	35	35	40	37	20	0.525	0.555556	0.388889	0.805556	0.318549	0.89371	8.65873e-16	0.883995	0.179069	4.14108e-15	0.105873	0.0677362	1.51581e-17	0.601481	0.0106363	0.56088	0.00621365	5.54735e-15	0.0498091	0.00629092
20	4	0	0	0	1	8	0.271723	0.753322	1	0	0	0.669235	0.494648	0.436892	0.299396	0.0936126	0.598737	0	0.818832	0.224294	1	0.688441	31	36	35	35	40	37	20	0.525	0.555556	0.388889	0.805556	0.915926	0.245087	0.272336	0.351442	8.4693e-17	1	0.0247521	0.363171	1	0.285651	0.270325	0.306649	1	1	0.0782755	0.190424
20	4	0	0	1	0	4	0.735809	1	0.0227779	0.206325	0.0242487	0.16702	0	0.345093	0.0498656	0.127742	0.614892	0.0742118	1	0.236299	0.380734	0.0516682	31	36	35	35	40	37	20	0.525	0.555556	0.388889	0.805556	0.592326	1	0.601619	1	0.597513	0.412619	1	1	0.0907205	0.861539	1	0.755381	0.00464585	0.0670251	1	1
20	4	0	0	1	1	6	0	0.865594	0.865595	0.201912	0.0709951	0	0.743388	0.753997	0.567197	0.253684	0.617602	0.000471528	0.778439	0.223681	0.985753	0.734728	31	36	35	35	40	37	20	0.525	0.555556	0.388889	0.805556	0.697073	0.0693424	0.634992	0.0836576	1	0.389188	0.0600672	0.0660994	0.494357	1	0.567565	0.959665	0.759183	0.618126	0.0456248	5.05727e-15
20	4	0	1	0	0	2	1	0.648097	0.501481	0.470416	0.225292	0.612685	1	0.758762	0.707145	0.637596	0.208443	0.484422	0.51337	0.181985	0.398397	0.256019	31	36	35	35	40	37	20	0.525	0.555556	0.388889	0.805556	1	0.91998	0.189811	0.943135	0.935693	0.502835	0.0875559	0.0601064	0.267342	0.656323	9.91656e-16	0.638909	0.154169	0.365078	0.0964944	0.0621229
20	4	0	1	0	1	1	0.0480316	0	0.718539	0.441024	0.303073	0.33998	0.424191	0.493919	0.961111	0.572733	0.508307	0.679655	0.241177	1	0	0.363414	31	36	35	35	40	37	20	0.525	0.555556	0.388889	0.805556	0.546254	0.896194	0.00172074	0.889233	0.722564	0.448949	0.342615	0.892149	0.111259	0.658833	0.0508292	0.613441	1.19149e-17	0.0748465	0.307788	0.97481
20	4	0	1	1	0	5	0.238086	0.489468	0	1	1	0.273576	0.809838	0	1	1	0.753418	1	0.179734	0.180937	0.0209588	2.64175e-22	31	36	35	35	40	37	20	0.525	0.555556	0.388889	0.805556	0.771967	1.1727e-16	0.0929323	4.96356e-17	0.230896	0.576788	0.00737364	1.23619e-15	0.802202	0.968293	0.34431	1	0.944127	0.741263	0.0274882	0.00906
20	4	0	1	1	1	3	0.941265	0.655843	0.978387	0.367068	0.157409	1	0.493199	1	0.393944	0.259694	1	0.188225	0	0.104704	0.0113557	1	31	36	35	35	40	37	20	0.525	0.555556	0.388889	0.805556	2.73175e-17	0.158601	1	0.227442	0.160796	0.307631	1.90539e-15	0.403676	0.452505	2.47328e-16	0.958491	6.17982e-17	0.807692	0.600768	1.23468e-14	0.143393
20	1	1	0	0	0	7	0.345091	0.613584	0	0.152693	0.135526	0	0.0445898	0.0996175	0	0	0.476351	0.126013	1	0.18412	0.832208	0.107171	31	36	35	35	40	37	20	0.5	0.527778	0.444444	0.666667	2.901e-17	0.960008	0.460198	0.90829	0.379412	0.201079	0.85542	1	1.37047e-17	0.595925	1	0.434278	1.05176e-17	4.93923e-15	0.764226	1
20	1	1	0	0	1	6	0.840705	0.565738	0.313761	0.203773	0.211427	0.658617	0.339038	0.126657	0.340144	0.314632	0.606206	0.353126	0.503007	0	1	0.721683	31	36	35	35	40	37	20	0.5	0.527778	0.444444	0.666667	0.476814	1.25818e-16	0.767299	0.0193138	0.629277	1	1	0.775164	0.750364	0.998406	0.664349	0.911988	0.696809	0.857005	1	0.683182
20	1	1	0	1	0	2	0	0.53462	1	1	1	1	0	0	0.600187	0.560283	0	1	0.513196	0.259147	0.463978	1.6549e-22	31	36	35	35	40	37	20	0.5	0.527778	0.444444	0.666667	0.944981	0.202828	0.431093	0.294857	0.234211	0.399503	0.0667442	0.552619	1	2.89119e-16	0.401691	7.61118e-17	1	1	0.272618	0.4034
20	1	1	0	1	1	3	0.236381	0.818833	0.53515	0	0	0.328832	0.660276	1	0.324146	0.26895	0.457071	0.465479	0.582495	0.164294	0.534966	0.278616	31	36	35	35	40	37	20	0.5	0.527778	0.444444	0.666667	1	1	0.318497	1	1	0.573276	0.635634	0.932301	0.378894	0.71131	0.206844	0.613565	0.162098	0.484943	0.574993	0.960033
20	1	1	1	0	0	7	0.860395	0.760673	0.224231	0.0853816	0.144446	0.401944	0.751929	0.909714	0.292837	0.611681	1	0.577014	0.328904	0.808253	0	0.588788	31	36	35	35	40	37	20	0.5	0.527778	0.444444	0.666667	0.124895	0.243222	1.58728e-15	0.35382	0.173423	0.196036	0.0187902	1.4566e-15	0.696679	0.271152	0.202347	0.27495	0.89687	0.761896	0.113478	0.0656963
20	1	1	1	0	1	8	0.860395	0.760673	0.224231	0.0853816	0.144446	0.401944	0.751929	0.909714	0.292837	0.611681	0.8975	0.648209	0.298075	0.920495	0.0529239	0.570009	31	36	35	35	40	37	20	0.5	0.527778	0.444444	0.666667	0.232085	0.00471374	0.289242	5.13719e-17	8.69221e-17	2.11066e-15	2.1577e-15	0.000618017	0.384055	1	0.539627	1	0.648967	0.367785	1.43321e-14	6.26242e-15
20	1	1	1	1	0	4	0.763327	1	0.173321	0.276914	0.341831	0.369498	0.540682	0.16872	0.415979	0.869442	0.345339	0.639194	0	1	0.285167	0.13746	31	36	35	35	40	37	20	0.5	0.527778	0.444444	0.666667	0.332342	0.915044	1	0.863609	0.534632	0.226949	0.102171	0.0774723	0.0685582	0.496597	0.804465	0.367572	0.108828	0.205481	0.194793	0.105994
20	1	1	1	1	1	1	1	0	0.691372	0.301126	0.412969	0.483257	1	0.902018	1	1	0.7983	0	0.404664	0.670106	0.130281	1	31	36	35	35	40	37	20	0.5	0.527778	0.444444	0.666667	0.679838	0.962596	0.0510852	0.951196	0.815485	0.371169	0.0927762	0.0454498	0.211678	0.61597	1.25867e-15	0.525365	0.148396	0.380049	0.15373	0.113109
20	3	1	0	0	0	5	1	0	0	1	1	0.209674	0.199087	0.926617	0.234249	0.480375	0.264916	0	1	0.206439	0.183706	3.63625e-22	31	36	35	35	40	37	20	0.625	0.416667	0.472222	0.527778	0.0880278	0.944371	0.272366	0.965102	0.168761	0.04777	1	0.0420935	0.0555003	0.510714	5.21281e-16	0.394943	0.0128703	5.12279e-15	0.0279371	0.118556
20	3	1	0	0	1	2	0	0.0988697	0.766949	0.567504	0.711803	0.335554	0	0.769864	0.150987	0	0.30837	1	0.729227	0	0.726232	0.689363	31	36	35	35	40	37	20	0.625	0.416667	0.472222	0.527778	0.79388	1.22682e-16	7.52963e-16	4.98697e-17	0.538449	0.717053	6.6227e-14	0.906643	0.780884	0.97315	0.518617	0.955053	0.727273	0.761604	0.134497	1
20	3	1	0	1	0	5	0.164174	0.466222	0.600342	0	0	0.0495718	0.361438	0.591333	0	0.177257	0	0.104912	0.983523	0.473637	0.320254	0.252394	31	36	35	35	40	37	20	0.625	0.416667	0.472222	0.527778	0.0609692	0.848958	0.761614	0.81356	9.83604e-17	0.036325	0.785684	1	1.14675e-17	5.26893e-16	0.40005	1.02401e-16	0.00627456	0.000513166	0.165602	0.843434
20	3	1	0	1	1	8	0.408826	0.62203	0.919004	0.203609	0.167372	0.542082	0.357742	0.636953	0.139167	0.0402824	0.157856	0.816804	0.652401	0.572485	0.418163	0.728478	31	36	35	35	40	37	20	0.625	0.416667	0.472222	0.527778	0.262159	0.118388	0.927666	0.189575	0.621877	0.191207	0.794636	0.896392	0.740025	0.833288	1	0.878395	0.866275	0.66018	0.828883	0.928883
20	3	1	1	0	0	3	0.356607	0.510046	0.733636	0.544955	0.668632	0.231315	0.464356	0.446	0.495251	0.744281	0.36548	0.428448	0.203668	0.389861	0.0830826	1	31	36	35	35	40	37	20	0.625	0.416667	0.472222	0.527778	1	0.230297	1	0.383456	0.848392	0.381027	0.928298	2.40692e-15	1	0.13788	0.568147	0.217658	1	1	1	0.296149
20	3	1	1	0	1	4	0.551045	0.629214	1	0.378559	0.534202	1	0.847471	1	0.94091	0.991841	0.455715	0.266207	0	0.384785	0	0	31	36	35	35	40	37	20	0.625	0.416667	0.472222	0.527778	0.0329176	1	0.0055741	0.996962	0.464105	0.0535805	0.926468	0.0228466	0.0265231	0.761625	0.0359596	0.462014	0.0141956	0.0251197	0.0219549	0.0247663
20	3	1	1	1	0	7	0.167893	1	0.498668	0.230174	0.153881	0	0.221417	0	0.00835668	0.129822	0.083373	0.374337	0.482858	0.158025	1	0.604589	31	36	35	35	40	37	20	0.625	0.416667	0.472222	0.527778	0.826826	0.0278095	0.565039	0.0299388	1	1	0.73606	0.0301664	0.833494	1	0.851662	1	0.728599	0.880289	0.479904	0.335553
20	3	1	1	1	1	6	0.520109	0.118051	0.811376	0.224949	0.184734	0.414009	1	0.813388	1	1	1	0.198814	0.336066	1	0.0053766	0.793234	31	36	35	35	40	37	20	0.625	0.416667	0.472222	0.527778	1.70821e-17	0.961498	0.507004	1	0.234611	3.27356e-15	0.55591	0.0170768	0.00579658	0.615299	0.225959	0.480606	1.10114e-17	0.0233936	6.96501e-14	1.69732e-14
21	1	0	0	0	0	8	0	0	0.706083	0	0	0.877259	0.223238	0.378474	0	0	0.532714	0	1	0.219676	1	0.212293	30	41	42	36	38	37	18	0.65	0.0277778	0.333333	0.333333	0	0	0	0	0	0	0	0	0	0	0	0	0	0	0	0
21	1	0	0	0	1	4	0.0613022	0.13381	0.501104	0.452023	0.649311	0.604441	0.634325	1	0.395754	0.733414	0.554522	0.4015	0.480612	0.361889	0.0592893	0.784089	30	41	42	36	38	37	18	0.65	0.0277778	0.333333	0.333333	0	0	0	0	0	0	0	0	0	0	0	0	0	0	0	0
21	1	0	0	1	0	1	1	0.72566	0	0.806667	0.862431	0.317724	0.234402	0	0.254999	0.277755	0	0.0644822	0.464605	0.372926	0.0712049	2.97861e-22	30	41	42	36	38	37	18	0.65	0.0277778	0.333333	0.333333	0	0	0	0	0	0	0	0	0	0	0	0	0	0	0	0
21	1	0	0	1	1	5	0.00490112	0.18761	1	0.226477	0.0730222	0	0.822332	0.918088	0.273893	0.39399	0.740024	0.203237	0.947611	0.0911574	0.551875	0.982654	30	41	42	36	38	37	18	0.65	0.0277778	0.333333	0.333333	0	0	0	0	0	0	0	0	0	0	0	0	0	0	0	0
21	1	0	1	0	0	2	0.0484593	0.238636	0.820537	0.402988	0.344868	0.499419	1	0.273577	0.373136	0.668598	0.97374	0.322675	0.150125	1	0.646677	0.407623	30	41	42	36	38	37	18	0.65	0.0277778	0.333333	0.333333	0	0	0	0	0	0	0	0	0	0	0	0	0	0	0	0
21	1	0	1	0	1	5	0.739432	1	0.28146	1	1	0.589951	0.929251	0.751334	1	0.678036	0.945396	1	0	0.218545	0.0347951	1	30	41	42	36	38	37	18	0.65	0.0277778	0.333333	0.333333	0	0	0	0	0	0	0	0	0	0	0	0	0	0	0	0
21	1	0	1	1	0	8	0.175322	0.52746	0.659339	0.749803	0.842011	0.687006	0.452818	0.198336	0.636527	1	1	0.521249	0.395879	0.771895	0	0.774293	30	41	42	36	38	37	18	0.65	0.0277778	0.333333	0.333333	0	0	0	0	0	0	0	0	0	0	0	0	0	0	0	0
21	1	0	1	1	1	3	0.006087	0.0982265	0.83056	0.261598	0.143428	1	0	0.322259	0.183238	0.311023	0.65279	0.680485	0.201388	0	0.0650266	0.617504	30	41	42	36	38	37	18	0.65	0.0277778	0.333333	0.333333	0	0	0	0	0	0	0	0	0	0	0	0	0	0	0	0
21	2	0	0	0	0	4	0	0.447372	0	0.0560985	0.232953	0.620532	0.839203	0	0.0309155	0.13594	0	0.0759149	0.413423	1	0.216682	2.58158e-22	30	41	42	36	38	37	18	0.45	0.305556	0.527778	0.361111	0.970263	0.0950777	0.311495	0.133136	0.593302	1	0.470925	0.367893	1	2.39481e-16	0.297282	6.31698e-17	1	1	0.434615	0.356509
21	2	0	0	0	1	7	0.434419	1	0.486941	0.444177	0.0975124	1	1	1	0.367059	0.528615	0.855785	0.116029	0.358978	0.324334	0.0341309	0.609449	30	41	42	36	38	37	18	0.45	0.305556	0.527778	0.361111	0.807723	0	8.57826e-16	4.35173e-17	0.212266	0.524003	0.000476332	0.00609993	0.490006	0.986406	0.824316	1	0.650695	0.693758	0.043065	0.0880514
21	2	0	0	1	0	6	1	0.188126	0.0704488	0.102663	0	0	0	0.850896	0.0488642	0.205342	0.338748	0.0708199	0.435221	0.611842	0.250813	0.113114	30	41	42	36	38	37	18	0.45	0.305556	0.527778	0.361111	1	0.152629	0.261338	0.22332	0.339972	0.792057	0.223186	0.63413	0.907683	0.101392	0.49089	0.121733	0.955918	0.897346	0.286505	0.554677
21	2	0	0	1	1	1	0.000447123	0.308426	0.760215	0.20725	0.921079	0.273497	0.752475	0.201643	0	0	0.51918	0	0.348828	0.706226	1	0.810486	30	41	42	36	38	37	18	0.45	0.305556	0.527778	0.361111	0.352542	1.21974e-16	0.715529	0.0373107	6.58499e-17	0.370812	0.00843036	0.430809	0.409191	1	1	0.993217	0.718169	0.564783	0.0656615	0.240449
21	2	0	1	0	0	4	0.283061	0.30191	0.92589	0.11801	0.809634	0.122541	0.501154	0.348741	0.252382	0.29016	1	0.805116	0.114257	0.185321	0.258053	0.674013	30	41	42	36	38	37	18	0.45	0.305556	0.527778	0.361111	0.888275	0.833245	1	0.778737	1	0.619928	0.171325	0.416945	0.322563	0.518163	0.472869	0.451831	0.0853671	0.433594	0.308226	0.35874
21	2	0	1	0	1	7	0.106546	0.25757	0.177947	1	0.597219	0.0952126	0.952874	0.244059	1	1	0.89844	0.368621	0	0	0	0.850806	30	41	42	36	38	37	18	0.45	0.305556	0.527778	0.361111	1.49e-17	1	0.4142	1	0.138587	1.9779e-15	2.15502e-15	1.81899e-15	8.10415e-18	0.887867	0.168627	0.81726	9.79898e-18	3.33247e-15	1.16932e-14	8.17049e-15
21	2	0	1	1	0	8	0.251668	0	0.315056	0.818642	1	0.237693	0.083033	0.791738	0.647339	0.672013	0.876958	0.68787	1	0.060539	0.0467841	1	30	41	42	36	38	37	18	0.45	0.305556	0.527778	0.361111	0.567099	0.866811	0.97006	0.812098	0.703277	0.572398	1	1	0.245762	0.589446	0.479409	0.512944	0.118985	0.393427	1	1
21	2	0	1	1	1	3	0.0170401	0.326041	1	0	0.299969	0.740142	0.731662	0.391512	0.343177	0.677009	0.815493	1	0.631775	0.958272	0.582768	0.983343	30	41	42	36	38	37	18	0.45	0.305556	0.527778	0.361111	0.215428	0.986162	0.499157	0.963593	0.304706	0.19682	0.49013	0.948018	0.0907483	0.846936	8.59539e-16	0.747338	0.0633086	0.179077	0.378891	0.851799
21	3	1	0	0	0	6	0.46457	0.296654	0.145776	0.538601	0.770222	0	0.509124	0	0.3656	0.37175	0.0852078	0.61952	6.0197e-05	1.10491e-05	0.0229511	0.0949319	30	41	42	36	38	37	18	0.4	0.527778	0.583333	0.361111	1	0.127174	0.271171	0.141187	0.442175	1	0.549861	0.357807	1	0.0212962	0.183423	0.0191249	0.998285	1	0.65257	0.384479
21	3	1	0	0	1	1	0.205713	1	0.788863	0.235865	0.149083	0.371651	0.195208	0.810141	0.10566	0.108267	0.222027	0	0.000138742	1.84428e-06	0.0883298	1	30	41	42	36	38	37	18	0.4	0.527778	0.583333	0.361111	0.182471	0.0556391	0.344205	0.0378001	0.0317488	0.421866	0.327748	0.293656	0.264994	1	1	1	0.61144	0.541391	0.136748	0.171092
21	3	1	0	1	0	2	0.930381	0.572307	0.0831349	0.540343	0.422656	1	0	0.574808	0.20102	0.306563	0	0.728979	8.1883e-05	9.14359e-06	0.325121	4.21868e-22	30	41	42	36	38	37	18	0.4	0.527778	0.583333	0.361111	0.665385	0.112141	1	0.139383	0.7071	0.502023	0.836908	0.827748	0.75124	2.34626e-16	0.563163	6.0288e-17	1	0.904026	1	0.768067
21	3	1	0	1	1	5	0.883107	0.762587	0.637088	0	0	0.154746	0.926787	0.762661	0	0	0.09577	0.181026	8.61077e-05	9.51785e-07	1	0.915637	30	41	42	36	38	37	18	0.4	0.527778	0.583333	0.361111	0.0480164	1.19385e-16	8.70459e-16	4.48813e-17	7.95288e-17	0.196348	1	0.878763	0.261395	0.972466	0.299543	0.922678	0.577535	0.309048	0.69885	0.67409
21	3	1	1	0	0	5	0.542717	0.23608	0.813835	0.408805	0.536912	0.83558	0.102099	0.629997	1	1	0.40092	0.235298	2.19044e-05	1.38408e-05	0.340889	0.758745	30	41	42	36	38	37	18	0.4	0.527778	0.583333	0.361111	0.545617	0.904186	0.508746	0.886965	0.995153	0.692279	0.00665998	1.82431e-15	0.316427	0.655481	0.0274256	0.572478	0.138545	0.46812	0.20192	0.250828
21	3	1	1	0	1	1	0.557928	0.964704	0	1	1	0.752032	1	0.64416	0.309322	0.339138	0.261639	0.486236	0	5.26276e-06	0.0351431	0.286536	30	41	42	36	38	37	18	0.4	0.527778	0.583333	0.361111	1.1477e-17	0.922803	0.67736	0.904269	0.44532	1.96097e-15	3.00514e-15	0.00303665	6.38687e-18	0.712153	0.0996481	0.611663	0.00948223	3.41465e-15	1.90709e-14	8.64317e-15
21	3	1	1	1	0	7	0	0	1	0.18129	0.341741	0.466775	0.0856851	0.745915	0.980822	0.780557	0.181756	0.879074	0.000158526	0	0.451669	0.699887	30	41	42	36	38	37	18	0.4	0.527778	0.583333	0.361111	0.201042	0.916442	0.769966	0.863727	1	0.204818	0.261137	0.807867	0.109102	0.681493	0.0748608	0.538186	0.114158	0.220396	0.388084	0.807645
21	3	1	1	1	1	3	1	0.413782	0.407043	0.0662291	0.0289734	0.383285	0.135246	1	0.559698	0.608514	1	1	1	1	0	0.511379	30	41	42	36	38	37	18	0.4	0.527778	0.583333	0.361111	0.0978591	1	0.48983	1	0.252119	0.193121	0.913824	1	0.0397505	0.865393	7.31991e-16	0.741313	9.29218e-18	0.0555337	0.70023	1
21	4	1	0	0	0	8	0.327029	0.824763	0.117476	1	0.840621	0.760627	0.406355	0.771215	0.286793	0.376202	0.158033	0.316738	0.812332	0.356412	0.129183	0.0995417	30	41	42	36	38	37	18	0.525	0.25	0.333333	0.472222	1	0.100987	0.138823	0.131375	0.328257	1	0.0356919	0.0756447	1	2.39513e-16	0.580029	6.36128e-17	1	1	0.142785	0.117236
21	4	1	0	0	1	4	0	1	0.473621	0.0562678	0.148019	0	0.747786	0.843922	0	0	0.698813	0	0.983542	0.0884588	0.367627	0.498971	30	41	42	36	38	37	18	0.525	0.25	0.333333	0.472222	0.137962	1.39336e-16	0.410227	5.21461e-17	0.0921444	0.492012	1.35769e-15	6.65336e-16	0.531322	1	1	1	0.814114	0.584207	0.0474244	0.0520681
21	4	1	0	1	0	2	1	0.78535	0	0.903799	1	0.534674	0.871961	0	0.442436	0.429626	0	0.187423	0.870817	0.0162359	0.426003	2.08866e-22	30	41	42	36	38	37	18	0.525	0.25	0.333333	0.472222	0.265713	0.205038	0.0797502	0.274492	5.67992e-17	0.328972	0.02211	0.259762	0.531816	0.695028	0.369686	0.635796	0.865497	0.618815	0.0615261	0.17298
21	4	1	0	1	1	6	0.566216	0.584965	1	0.73906	0.73279	0.794214	0.362095	0.756184	0.628228	0.848734	0.310817	0.546266	1	0	0.461836	1	30	41	42	36	38	37	18	0.525	0.25	0.333333	0.472222	0.31397	0.276003	1	0.291416	0.767087	0.575552	1	1	0.489988	0.883407	0.893773	0.901493	0.723722	0.702557	0.709385	0.64952
21	4	1	1	0	0	1	0.258562	0.43618	0.327756	0.552757	0.778497	1	1	0.117423	0.742315	0.848839	0.675942	0.864229	0.394873	0.440334	0.321946	0.329973	30	41	42	36	38	37	18	0.525	0.25	0.333333	0.472222	0.542567	0.993614	1.51223e-15	0.945079	0.603681	0.553555	0.0991994	0.159103	0.28353	0.633273	6.91556e-16	0.532262	0.13764	0.52772	0.106025	0.152738
21	4	1	1	0	1	7	0.914219	0.783327	0.314174	0.460454	0.270679	0.63594	0.653598	0.691184	0.401429	0.405259	0.67121	0.403014	0	1	0.014695	0.249296	30	41	42	36	38	37	18	0.525	0.25	0.333333	0.472222	1.25658e-17	0.962594	0.599168	0.934575	0.500855	1.99864e-15	0.0426279	0.0280099	7.45909e-18	0.540676	0.631592	0.491211	9.71818e-18	3.42209e-15	6.74269e-15	3.1861e-15
21	4	1	1	1	0	6	0.283664	0	0.682284	0.376101	0.355768	0.143877	0.884937	0.656718	1	1	0.927502	0.693271	0.223206	0.00993892	1	0.477242	30	41	42	36	38	37	18	0.525	0.25	0.333333	0.472222	0.737373	0.99534	0.435194	0.945486	1	0.780779	0.9432	0.634419	0.507689	0.593896	0.238417	0.485543	0.215201	0.624026	1	1
21	4	1	1	1	1	4	0.403311	0.974221	0.572983	0	0	0.881853	0	1	0.335781	0.359779	1	1	0.46056	0.249661	0	0.404008	30	41	42	36	38	37	18	0.525	0.25	0.333333	0.472222	0.080569	1	0.752683	1	0.544471	0.26758	0.0986558	0.392559	0.100714	0.659635	0.676445	0.626146	0.0362852	0.110529	0.0796891	0.40169
[truncated: 8 more columns]
